# Supplementary material for: Catalyst-free synthesis of substituted pyridin-2-yl, quinolin-2-yl, and isoquinolin-1-yl carbamates from the corresponding hetaryl ureas and alcohols
Source: Royal Society of Chemistry journal article supplement (doi:10.1039/d1ob00783a), 2021-01-01
Supplement: d1ob00783a1.pdf [file d1ob00783a1.pdf]

**Supporting information**

**for**

**Catalyst-free Synthesis of Substituted Pyridin-2-yl, Quinolin-2-yl, and  
Isoquinolin-1-yl Carbamates from the Corresponding Hetaryl Ureas and  
Alcohols**

Svetlana O. Kasatkina, Kirill K. Geyl, Sergey V. Baykov\*, Irina A. Boyarskaya, and Vadim P.  
Boyarskiy\*

Address:

*Institute of Chemistry, Saint Petersburg State University, Universitetskaya Nab., 7/9, 199034  
Saint Petersburg, Russian Federation*

\*Corresponding authors: e-mail: [s.baykov@spbu.ru](mailto:s.baykov@spbu.ru), [v.boyarskii@spbu.ru](mailto:v.boyarskii@spbu.ru).

## Content

|                                                                                                                           |    |
|---------------------------------------------------------------------------------------------------------------------------|----|
| 1. General remarks.....                                                                                                   | 3  |
| 2. Preparation and characterization of ureas <b>1</b> .....                                                               | 4  |
| 3. Synthesis of carbamates <b>2</b> and <b>3</b> .....                                                                    | 12 |
| 4. <sup>1</sup> H, <sup>13</sup> C, and <sup>19</sup> F NMR spectra of compounds <b>1</b> , <b>2</b> , and <b>3</b> ..... | 25 |
| 5. X-ray diffraction data.....                                                                                            | 81 |
| 6. DFT calculations.....                                                                                                  | 87 |
| 7. The reaction mechanism experimental study .....                                                                        | 94 |
| 8. References .....                                                                                                       | 95 |

## 1. General remarks

Starting *N*-oxides were synthesized according to literature procedures: pyridine-*N*-oxides, quinoline-*N*-oxide and benzo[h]quinoline-*N*-oxide,<sup>1</sup> isoquinoline-*N*-oxide,<sup>2</sup> 4-nitroquinoline-*N*-oxide,<sup>3</sup> 4-methoxyquinoline-*N*-oxide.<sup>4</sup> All other reagents and solvents were purchased and were used as is. Reactions were monitored by analytical thin layer chromatography (TLC) Macherey–Nagel, TLC plates Silufol UV–254 using UV light for detection. Column chromatography was carried out with silica gel grade 60 (0.040–0.063 mm) 230–400 mesh with a hexane ethyl acetate mixture as eluent. NMR spectra were recorded on Bruker Avance DPX 400 (400 MHz and 101 MHz for <sup>1</sup>H and <sup>13</sup>C{<sup>1</sup>H} respectively) or on Bruker Avance III 500 MHz (500 MHz for <sup>1</sup>H, 126 MHz for <sup>13</sup>C) in DMSO-*d*<sub>6</sub> or in CDCl<sub>3</sub>. Chemical shifts are reported as parts per million ( $\delta$ , ppm); the solvent peaks were used as internal standards: 2.50 ppm for residual <sup>1</sup>H, 39.50 ppm for <sup>13</sup>C in DMSO-*d*<sub>6</sub>; 7.26 ppm for residual <sup>1</sup>H, 77.16 ppm for <sup>13</sup>C in CDCl<sub>3</sub>. Multiplicities are abbreviated as follows: s = singlet, d = doublet, t = triplet, q = quartet, m = multiplet, br = broad; coupling constants, *J*, are reported in Hertz (Hz). Melting points were determined in open capillary tubes on Electrothermal IA 9300 series Digital Melting Point Apparatus. High-resolution mass spectra (HRMS) were measured on Bruker Maxis HRMS–ESI–qTOF (ESI Ionization).

## 2. Preparation and characterization of ureas 1

**General procedure 1 (GP1).**<sup>1</sup> A mixture of substituted azine *N*-oxide (1.00 mmol) and dialkyl cyanamide (1.50 mmol) was stirred at r.t. for 2 min and methanesulfonic acid (96.0 mg, 1.00 mmol) was then added dropwise within 3 min. The reaction mixture was then stirred at 60 °C for 2 h, cooled down, diluted with saturated aq. Na<sub>2</sub>CO<sub>3</sub> (5.0 mL) and aq. NaCl (20 mL), and extracted with EtOAc (4 × 15 mL). Combined organic fractions were dried over anhydrous Na<sub>2</sub>SO<sub>4</sub>, filtered, and concentrated on a rotary evaporator. The crude product was subjected to column chromatography on silica gel (EtOAc/hexane, gradient from 50% to pure EtOAc) to give target urea **1** in good to excellent yields.

**General procedure 2 (GP2).**<sup>5</sup> A mixture of substituted azine-*N*-oxide (1 mmol), diamethyl cyanamide (2.0 mmol) and acetonitrile (2 mL, 20.0 mmol) was stirred at room temperature for 2 min, and then MsOH (144 mg, 1.5 mmol) was added dropwise within 3 min. The reaction mixture was stirred at 60 °C for 3 h, cooled, diluted with saturated aq. Na<sub>2</sub>CO<sub>3</sub> (2 mL) and aq. NaCl (5 mL), and extracted with EtOAc (4 × 10 mL). Combined organic fractions were dried with anhydrous Na<sub>2</sub>SO<sub>4</sub>, filtered, and concentrated on a rotary evaporator. The crude product was purified by column chromatography on silica gel (EtOAc/hexane (2:1) for 1,2,4-oxadiazole and acetone/DCM (1:19) for 1,3,4-oxadiazole) to give target urea **1**.

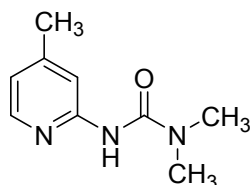

### 1,1-Dimethyl-3-(4-methylpyridin-2-yl)urea **1a**<sup>1</sup>

**GP1.** Beige powder; 81% yield (145 mg); mp 103–104 °C. <sup>1</sup>H NMR (400 MHz, CDCl<sub>3</sub>): δ 8.06 (d, *J* = 5.2 Hz, 1H), 7.93 (s, 1H), 7.11 (s, 1H), 6.79 (d, *J* = 5.2 Hz, 1H), 3.07 (s, 6H), 2.35 (s, 3H). <sup>13</sup>C NMR (101 MHz, CDCl<sub>3</sub>): δ 154.94, 152.82, 149.47, 147.03, 119.57, 113.51, 36.38, 21.37. HRMS (ESI), *m/z*: [M+H]<sup>+</sup> calcd. for C<sub>9</sub>H<sub>13</sub>N<sub>3</sub>O 180.1131; found 180.1145.



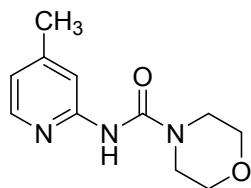

***N*-(4-Methylpyridin-2-yl)morpholine-4-carboxamide 1b**

**GP1.** Beige powder; 79% yield (175 mg); mp 56–58 °C. <sup>1</sup>H NMR (400 MHz, CDCl<sub>3</sub>): δ 8.03 (d, *J* = 5.2 Hz, 1H), 7.89 (s, 1H), 6.79 (dd, *J* = 5.2, 1.5 Hz, 1H), 3.72 (d, *J* = 5.2 Hz, 4H), 3.53 (d, *J* = 5.2 Hz, 4H), 2.35 (s, 3H). <sup>13</sup>C NMR (101 MHz, CDCl<sub>3</sub>): δ 154.32, 152.60, 150.09, 146.35, 119.76, 114.07, 66.48, 44.27, 21.45. HRMS (ESI), *m/z*: [M+H]<sup>+</sup> calcd. for C<sub>11</sub>H<sub>15</sub>N<sub>3</sub>O<sub>2</sub> 222.1237; found 222.1248.

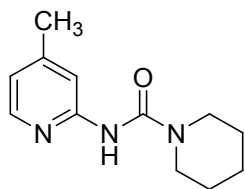

***N*-(4-Methylpyridin-2-yl)piperidine-1-carboxamide 1c**

**GP1.** Beige powder; 71% yield (156 mg); mp 108–109 °C. <sup>1</sup>H NMR (400 MHz, CDCl<sub>3</sub>): δ 8.06 (d, *J* = 5.2 Hz, 1H), 7.90 (s, 1H), 7.15 (s, 1H), 6.77 (d, *J* = 5.2 Hz, 1H), 3.54 – 3.46 (m, 4H), 2.35 (s, 3H), 1.71 – 1.60 (m, 6H). <sup>13</sup>C NMR (101 MHz, CDCl<sub>3</sub>): δ 154.00, 153.01, 149.40, 147.05, 119.45, 113.66, 45.20, 25.70, 24.38, 21.37. HRMS (ESI), *m/z*: [M+Na]<sup>+</sup> calcd. for C<sub>12</sub>H<sub>17</sub>N<sub>3</sub>O 242.1264; found 242.1280.

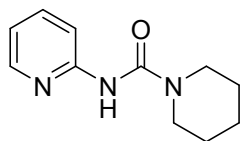

***N*-(Pyridin-2-yl)piperidine-1-carboxamide 1d<sup>1</sup>**

**GP1.** Brown powder; 44% yield (90 mg); mp 87–88 °C. <sup>1</sup>H NMR (400 MHz, CDCl<sub>3</sub>): δ 8.23 – 8.16 (m, 1H), 8.03 (d, *J* = 8.4 Hz, 1H), 7.64 (s, 1H), 7.28 (s, 1H), 6.93 (d, *J* = 2.4 Hz, 1H), 3.57 – 3.41 (m, 4H), 1.71 – 1.57 (m, 6H). <sup>13</sup>C NMR (101 MHz, CDCl<sub>3</sub>): δ 153.92, 153.02, 147.44, 138.01, 118.14, 113.26, 45.20, 25.71, 24.37.

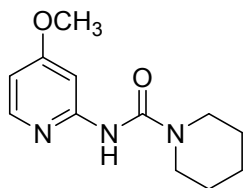

***N*-(4-Methoxypyridin-2-yl)piperidine-1-carboxamide **1e****

**GP1.** White powder; 58% yield (136 mg); mp 74–75 °C. <sup>1</sup>H NMR (400 MHz, CDCl<sub>3</sub>): δ 7.99 (d, *J* = 6.0 Hz, 1H), 7.72 (d, *J* = 2.4 Hz, 1H), 7.25 (s, 1H), 6.51 (dd, *J* = 6.0, 2.4 Hz, 1H), 3.88 (s, 3H), 3.55 – 3.44 (m, 4H), 1.74 – 1.58 (m, 6H). <sup>13</sup>C NMR (101 MHz, CDCl<sub>3</sub>): δ 167.56, 154.72, 153.92, 147.37, 106.92, 97.16, 55.32, 45.23, 25.71, 24.36. HRMS (ESI), *m/z*: [M+Na]<sup>+</sup> calcd. for C<sub>12</sub>H<sub>17</sub>N<sub>3</sub>O<sub>2</sub> 258.1213; found 258.1214.

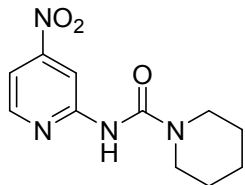

***N*-(4-Nitropyridin-2-yl)piperidine-1-carboxamide **1f****

**GP1.** Orange powder; 66% yield (165 mg); mp 119–121 °C. <sup>1</sup>H NMR (400 MHz, CDCl<sub>3</sub>): δ 8.83 (d, *J* = 2.0 Hz, 1H), 8.42 (d, *J* = 5.6 Hz, 1H), 7.78 – 7.51 (m, 2H), 3.58 – 3.48 (m, 4H), 1.75 – 1.60 (m, 6H). <sup>13</sup>C NMR (101 MHz, CDCl<sub>3</sub>): δ 155.42, 155.22, 153.07, 149.13, 110.65, 106.65, 45.31, 25.69, 24.24. HRMS (ESI), *m/z*: [M+Na]<sup>+</sup> calcd. for C<sub>15</sub>H<sub>17</sub>N<sub>3</sub>O 273.0958; found 273.0963.

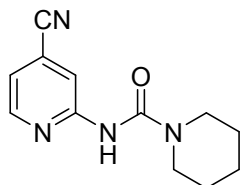

***N*-(4-Cyanopyridin-2-yl)piperidine-1-carboxamide **1g****

**GP1.** Beige powder; 75% yield (173 mg); mp 114–115 °C. <sup>1</sup>H NMR (400 MHz, CDCl<sub>3</sub>): δ 8.44 – 8.37 (m, 1H), 8.34 (dd, *J* = 5.2, 0.8 Hz, 1H), 7.34 (s, 1H), 7.14 (dd, *J* = 5.2, 1.2 Hz, 1H), 3.57 – 3.47 (m, 4H), 1.74 – 1.62 (m, 6H). <sup>13</sup>C NMR (101 MHz, CDCl<sub>3</sub>): δ 153.79, 153.17, 148.63, 121.97, 121.95, 119.27, 119.25, 116.77, 115.38, 45.28, 25.67, 24.24. HRMS (ESI), *m/z*: [M+Na]<sup>+</sup> calcd. for C<sub>12</sub>H<sub>14</sub>N<sub>4</sub>O 253.1060; found 253.1072.

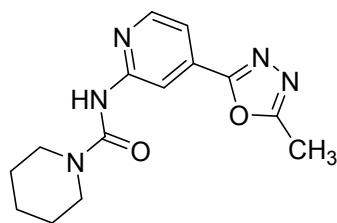

***N*-(4-(5-Methyl-1,3,4-oxadiazol-2-yl)pyridin-2-yl)piperidine-1-carboxamide 1h<sup>5</sup>**

**GP2.** Beige powder; 57% yield (164 mg); m.p. 162–164 °C. <sup>1</sup>H NMR (400 MHz, CDCl<sub>3</sub>): δ 8.68 (s, 1H), 8.33 (dd, *J* = 5.2, 0.9 Hz, 1H), 7.93 – 7.77 (br s, 1H), 7.68 (dd, *J* = 5.2, 1.5 Hz, 1H), 3.54 – 3.57 (m, 4H), 2.65 (s, 3H), 1.74 – 1.64 (m, 6H). <sup>13</sup>C NMR (101 MHz, DMSO-*d*<sub>6</sub>): δ 165.46, 163.12, 155.05, 154.48, 148.31, 132.85, 114.14, 110.26, 45.32, 25.95, 24.44, 11.17. HRMS (ESI), *m/z*: [M+H]<sup>+</sup> calcd. for C<sub>14</sub>H<sub>17</sub>N<sub>5</sub>O<sub>2</sub> 288.1455; found 288.1457.

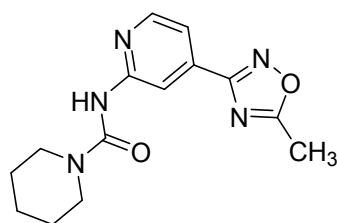

***N*-(4-(5-Methyl-1,2,4-oxadiazol-3-yl)pyridin-2-yl)piperidine-1-carboxamide 1i<sup>5</sup>**

**GP2.** Beige powder; 52% yield (149 mg); m.p. 127–129 °C. <sup>1</sup>H NMR (400 MHz, CDCl<sub>3</sub>): δ 8.75 (m, 1H), 8.30 (d, *J* = 5.2 Hz, 1H), 7.79 – 7.60 (br s, 1H), 7.58 (dd, *J* = 5.2, 1.0 Hz, 1H), 3.60 – 3.44 (m, 4H), 2.67 (s, 3H), 1.72 – 1.60 (m, 6H). <sup>13</sup>C NMR (101 MHz, CDCl<sub>3</sub>): δ 177.09, 167.18, 153.90, 153.54, 147.83, 147.79, 136.50, 136.47, 115.61, 111.56, 45.28, 25.72, 24.36, 12.35. HRMS (ESI), *m/z*: [M+H]<sup>+</sup> calcd. for C<sub>14</sub>H<sub>17</sub>N<sub>5</sub>O<sub>2</sub> 288.1455; found 288.1469.

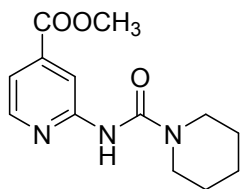

**Methyl 2-(piperidine-1-carboxamido)isonicotinate 1j**

**GP1.** White powder; 68% yield (179 mg); mp 102–104 °C. <sup>1</sup>H NMR (400 MHz, CDCl<sub>3</sub>): δ 8.58 (s, 1H), 8.32 (d, *J* = 5.2 Hz, 1H), 7.52 – 7.47 (m, 1H), 7.39 (s, 1H), 3.93 (s, 3H), 3.55 – 3.46 (m, 4H), 1.71 – 1.59 (m, 6H). <sup>13</sup>C NMR (101 MHz, CDCl<sub>3</sub>): δ 165.73, 153.92, 153.64, 148.10,

139.43, 117.52, 113.00, 52.53, 45.24, 25.70, 24.33. HRMS (ESI),  $m/z$ :  $[M+H]^+$  calcd. For  $C_{13}H_{17}N_3O_3$  264.1343; found 264.1356.

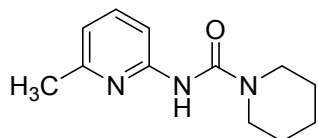

***N*-(6-Methylpyridin-2-yl)piperidine-1-carboxamide 1k**

**GP1.** Beige powder; 49% yield (107 mg); mp 67–68 °C.  $^1H$  NMR (400 MHz,  $CDCl_3$ ):  $\delta$  7.85 (d,  $J = 8.4$  Hz, 1H), 7.54 (t,  $J = 8.0$  Hz, 1H), 7.09 (s, 1H), 6.80 (d,  $J = 7.6$  Hz, 1H), 3.55 – 3.46 (m, 4H), 2.44 (s, 3H), 1.71 – 1.58 (m, 6H).  $^{13}C$  NMR (101 MHz,  $CDCl_3$ ):  $\delta$  156.26, 153.94, 152.32, 138.32, 117.53, 109.96, 45.18, 25.72, 24.38, 23.97. HRMS (ESI),  $m/z$ :  $[M+H]^+$  calcd. for  $C_{12}H_{17}N_3O$  220.1444; found 220.1468.

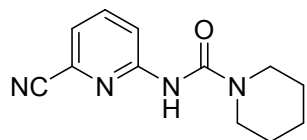

***N*-(6-Cyanopyridin-2-yl)piperidine-1-carboxamide 1l**

**GP1.** Beige powder; 64% yield (147 mg); mp 105–106 °C.  $^1H$  NMR (400 MHz,  $CDCl_3$ ):  $\delta$  8.31 (d,  $J = 8.8$  Hz, 1H), 7.74 (t,  $J = 8.0$  Hz, 1H), 7.54 – 7.30 (m, 2H), 3.54 – 3.47 (m, 4H), 1.73 – 1.60 (m, 6H).  $^{13}C$  NMR (101 MHz,  $CDCl_3$ ):  $\delta$  154.13, 153.23, 138.75, 130.94, 122.79, 117.37, 117.03, 45.29, 25.68, 24.24. HRMS (ESI),  $m/z$ :  $[M+Na]^+$  calcd. for  $C_{12}H_{14}N_4O$  253.1060; found 253.1051.

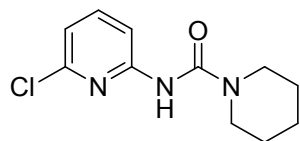

***N*-(6-Chloropyridin-2-yl)piperidine-1-carboxamide 1m**

**GP1.** Beige powder; 52% yield (125 mg); mp 108–109 °C.  $^1H$  NMR (400 MHz,  $CDCl_3$ ):  $\delta$  8.02 (d,  $J = 8.4$  Hz, 1H), 7.70 – 7.34 (m, 2H), 6.96 (d,  $J = 7.6$  Hz, 1H), 3.56 – 3.44 (m, 4H), 1.71 – 1.58 (m, 6H).  $^{13}C$  NMR (101 MHz,  $CDCl_3$ ):  $\delta$  153.26, 153.00, 140.84, 117.76, 111.38, 45.29,

25.69, 24.29. HRMS (ESI), m/z:  $[M+Na]^+$  calcd. for  $C_{11}H_{14}ClN_3O$  262.0718.1060; found 262.0719.

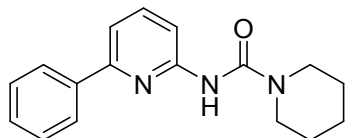

***N*-(6-Phenylpyridin-2-yl)piperidine-1-carboxamide 1n**

**GP2.** White powder; 46% yield (129 mg); mp 111–112 °C.  $^1H$  NMR (400 MHz,  $CDCl_3$ ):  $\delta$  8.15 – 7.91 (m, 3H), 7.74 (t,  $J = 8.0$  Hz, 1H), 7.62 – 7.28 (m, 5H), 3.63 – 3.42 (m, 4H), 1.76 – 1.53 (m, 6H).  $^{13}C$  NMR (101 MHz,  $CDCl_3$ ):  $\delta$  155.27, 153.99, 152.81, 139.00, 128.97, 128.72, 126.80, 114.95, 111.76, 45.23, 25.74, 24.38. HRMS (ESI), m/z:  $[M+H]^+$  calcd. for  $C_{15}H_{17}N_3O$  282.1601; found 282.1619.

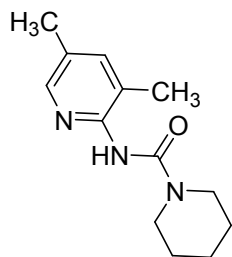

***N*-(3,5-Dimethylpyridin-2-yl)piperidine-1-carboxamide 1o**

**GP2.** White powder; 22% yield (51 mg); mp 104–105 °C.  $^1H$  NMR (400 MHz,  $CDCl_3$ ):  $\delta$  7.96 (s, 1H), 7.32 (s, 1H), 7.20 (s, 1H), 3.47 (s, 4H), 2.25 (s, 3H), 2.23 (s, 4H), 1.67 – 1.53 (m, 6H).  $^{13}C$  NMR (101 MHz,  $CDCl_3$ ):  $\delta$  155.35, 149.51, 145.16, 140.26, 129.80, 127.60, 45.32, 25.77, 24.47, 18.02, 17.59. HRMS (ESI), m/z:  $[M+H]^+$  calcd. for  $C_{13}H_{19}N_3O$  234.1601; found 234.1613.

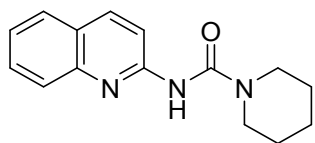

***N*-(Quinolin-2-yl)piperidine-1-carboxamide 1p**

**GP2.** Pale yellow powder; 63% yield (161 mg); mp 85–87 °C.  $^1H$  NMR (400 MHz,  $CDCl_3$ ):  $\delta$  8.29 (d,  $J = 9.2$  Hz, 1H), 8.11 (d,  $J = 9.2$  Hz, 1H), 7.77 (t,  $J = 7.6$  Hz, 2H), 7.69 – 7.48 (m, 2H),

7.41 (t,  $J = 7.6$  Hz, 1H), 3.65 – 3.48 (m, 4H), 1.75 – 1.57 (m, 6H).  $^{13}\text{C}$  NMR (101 MHz,  $\text{CDCl}_3$ ):  $\delta$  154.00, 152.73, 146.70, 138.01, 129.70, 127.57, 126.77, 125.72, 124.37, 114.33, 45.33, 25.77, 24.39. HRMS (ESI),  $m/z$ :  $[\text{M}+\text{H}]^+$  calcd. for  $\text{C}_{15}\text{H}_{17}\text{N}_3\text{O}$  256.1444; found 256.1433.

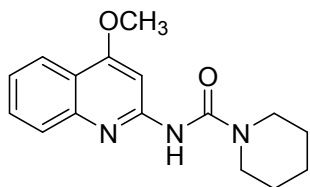

#### ***N*-(4-Methoxyquinolin-2-yl)piperidine-1-carboxamide 1q**

**GP2.** White powder; 69% yield (197 mg); mp 88–89 °C.  $^1\text{H}$  NMR (400 MHz,  $\text{DMSO}-d_6$ ):  $\delta$  9.36 (br s, 1H), 7.98 (d,  $J = 8.0$ , 1.6 Hz, 1H), 7.81 – 7.49 (m, 3H), 7.40 – 7.31 (m, 1H), 4.00 (s, 3H), 3.55 – 3.44 (m, 4H), 1.62 – 1.47 (m, 6H).  $^{13}\text{C}$  NMR (101 MHz,  $\text{DMSO}$ ):  $\delta$  162.45, 155.44, 155.02, 147.59, 130.39, 126.66, 123.65, 121.89, 118.69, 94.18, 56.21, 45.30, 26.02, 24.53. HRMS (ESI),  $m/z$ :  $[\text{M}+\text{Na}]^+$  calcd. for  $\text{C}_{16}\text{H}_{19}\text{N}_3\text{O}_2$  286.1550; found 286.1551.

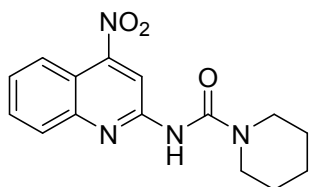

#### ***N*-(4-Nitroquinolin-2-yl)piperidine-1-carboxamide 1r**

**GP2.** Beige powder; 61% yield (183 mg); mp 145–146 °C.  $^1\text{H}$  NMR (400 MHz,  $\text{CDCl}_3$ ):  $\delta$  8.92 – 8.83 (m, 1H), 8.20 (t,  $J = 7.2$  Hz, 1H), 7.84 (t,  $J = 8.0$  Hz, 1H), 7.78 – 7.65 (m, 2H), 7.61 – 7.51 (m, 1H), 3.62 – 3.50 (m, 4H), 1.75 – 1.61 (m, 6H).  $^{13}\text{C}$  NMR (101 MHz,  $\text{CDCl}_3$ ):  $\delta$  154.05, 153.30, 152.22, 148.28, 131.13, 127.53, 126.95, 122.75, 116.34, 109.21, 45.38, 25.72, 24.25. HRMS (ESI),  $m/z$ :  $[\text{M}+\text{H}]^+$  calcd. for  $\text{C}_{15}\text{H}_{16}\text{N}_4\text{O}_3$  301.1295; found 301.1301.

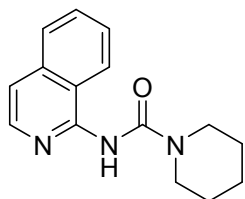

#### ***N*-(Isoquinolin-1-yl)piperidine-1-carboxamide 1s**

**GP2.** Brown powder; 70% yield (179 mg); mp 97–98 °C. <sup>1</sup>H NMR (400 MHz, CDCl<sub>3</sub>): δ 14.45 (br s, 1H), 8.68 (d, *J* = 8.0 Hz, 1H), 7.68 (t, *J* = 7.6 Hz, 1H), 7.59 – 7.48 (m, 2H), 7.17 (d, *J* = 6.8 Hz, 1H), 6.67 (d, *J* = 6.8 Hz, 1H), 4.71 – 3.53 (m, 4H), 1.76 – 1.57 (m, 6H). <sup>13</sup>C NMR (101 MHz, CDCl<sub>3</sub>): δ 164.60, 156.90, 136.66, 132.12, 126.96, 126.70, 126.42, 126.31, 126.09, 118.61, 108.19, 50.21, 24.94, 24.59, 23.05. HRMS (ESI), *m/z*: [M+H]<sup>+</sup> calcd. for C<sub>15</sub>H<sub>17</sub>N<sub>3</sub>O 256.1444; found 256.1459.

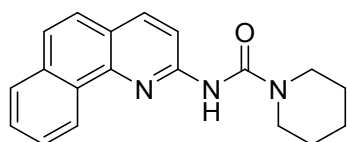

***N*-(Benzo[h]quinolin-2-yl)piperidine-1-carboxamide 1t**

**GP2.** Pale yellow powder; 45% yield (137 mg); mp 167–168 °C. <sup>1</sup>H NMR (400 MHz, CDCl<sub>3</sub>): δ 9.24 – 9.11 (m, 1H), 8.37 (d, *J* = 8.8 Hz, 1H), 8.16 (d, *J* = 8.8 Hz, 1H), 7.94 – 7.87 (m, 1H), 7.75 – 7.60 (m, 5H), 3.61 – 3.48 (m, 4H), 1.78 – 1.57 (m, 6H). <sup>13</sup>C NMR (101 MHz, CDCl<sub>3</sub>): δ 54.04, 151.91, 144.87, 137.99, 133.96, 130.55, 127.86, 127.84, 126.42, 125.22, 125.19, 124.06, 123.50, 123.03, 113.54, 45.26, 25.75, 24.38. HRMS (ESI), *m/z*: [M+H]<sup>+</sup> calcd. for C<sub>19</sub>H<sub>19</sub>N<sub>3</sub>O 306.1601; found 306.1613.

### 3. Synthesis of carbamates **2** and **3**

**General procedure 3 (GP3).** A solution of urea **1** (0.2 mmol) in alcohol (4 mL) was placed into a sealed tube and irradiated with microwave in Biotage Initiator+ at 120 °C for 1 h (for compounds **1a–j,o**) or 3 h (for compounds **1k–n** and **1r–t**) at 1 bar and 80 W. Then the reaction mixture was concentrated at reduced pressure to dryness and the crude product was purified by column chromatography using an *n*-hexane and ethyl acetate mixture as an eluent.

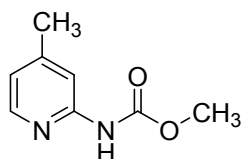

#### **Methyl (4-methylpyridin-2-yl)carbamate **2a****<sup>6</sup>

White powder; 91% yield (30 mg); mp 141–143 °C. <sup>1</sup>H NMR (400 MHz, CDCl<sub>3</sub>): δ 9.89 (s, 1H), 8.20 (d, *J* = 5.2 Hz, 1H), 7.89 (s, 1H), 6.83 (dd, *J* = 5.2, 1.6 Hz, 1H), 3.84 (s, 3H), 2.38 (s, 3H). <sup>13</sup>C NMR (101 MHz, CDCl<sub>3</sub>): δ 154.18, 152.33, 149.95, 147.20, 147.18, 119.79, 119.76, 112.90, 52.23, 21.45. HRMS (ESI), *m/z*: [M+H]<sup>+</sup> calcd. for C<sub>8</sub>H<sub>10</sub>N<sub>2</sub>O<sub>2</sub> 167.0815; found 167.0821.

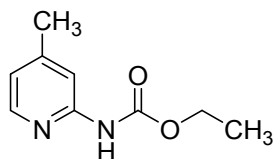

#### **Ethyl (4-methylpyridin-2-yl)carbamate **2b****<sup>7</sup>

White powder; 94% yield (34 mg); mp 128–130 °C. <sup>1</sup>H NMR (400 MHz, CDCl<sub>3</sub>): δ 8.69 (s, 1H), 8.18 (dd, *J* = 5.2, 0.8 Hz, 1H), 7.87 (d, *J* = 1.6 Hz, 1H), 6.83 (ddd, *J* = 5.2, 1.6, 0.8 Hz, 1H), 4.28 (q, *J* = 7.2 Hz, 2H), 2.38 (s, 3H), 1.37 (t, *J* = 7.2 Hz, 3H). <sup>13</sup>C NMR (101 MHz, CDCl<sub>3</sub>): δ 153.78, 152.48, 149.88, 147.19, 119.65, 112.94, 61.15, 21.44, 14.58. HRMS (ESI), *m/z*: [M+H]<sup>+</sup> calcd. for C<sub>9</sub>H<sub>12</sub>N<sub>2</sub>O<sub>2</sub> 181.0972; found 181.0991.

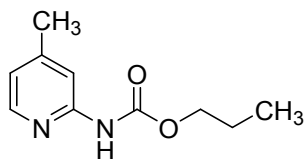

#### **Propyl (4-methylpyridin-2-yl)carbamate **2c****



White powder; 90% yield (35 mg); mp 113–114 °C. <sup>1</sup>H NMR (400 MHz, CDCl<sub>3</sub>): δ 10.14 (s, 1H), 8.22 (d, *J* = 5.2 Hz, 1H), 7.92 (s, 1H), 6.82 (d, *J* = 5.2 Hz, 1H), 4.18 (t, *J* = 6.8 Hz, 2H), 2.37 (s, 3H), 1.76 (hept., *J* = 7.2 Hz, 2H), 1.00 (t, *J* = 7.2 Hz, 3H). <sup>13</sup>C NMR (101 MHz, CDCl<sub>3</sub>): δ 153.92, 152.55, 150.10, 146.89, 119.58, 113.06, 66.82, 22.32, 21.48, 10.36. HRMS (ESI), *m/z*: [M+H]<sup>+</sup> calcd. for C<sub>10</sub>H<sub>14</sub>N<sub>2</sub>O<sub>2</sub> 195.1128; found: 195.1130.

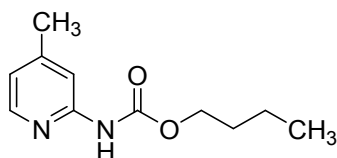

#### Butyl (4-methylpyridin-2-yl)carbamate 2d

White powder; 93% yield (39 mg); mp 87–88 °C. <sup>1</sup>H NMR (400 MHz, CDCl<sub>3</sub>): δ 9.10 (s, 1H), 8.21 (d, *J* = 5.2 Hz, 1H), 7.92 (s, 1H), 6.82 (d, *J* = 5.2 Hz, 1H), 4.22 (t, *J* = 6.8 Hz, 2H), 2.38 (s, 3H), 1.78 – 1.65 (m, 2H), 1.45 (p, *J* = 6.8 Hz, 2H), 0.98 (t, *J* = 7.2 Hz, 3H). <sup>13</sup>C NMR (101 MHz, CDCl<sub>3</sub>): δ 153.82, 152.36, 149.92, 147.14, 119.68, 112.95, 65.10, 31.00, 21.45, 19.09, 13.72. HRMS (ESI), *m/z*: [M+H]<sup>+</sup> calcd. for C<sub>11</sub>H<sub>16</sub>N<sub>2</sub>O<sub>2</sub> 209.1285; found 209.1295.

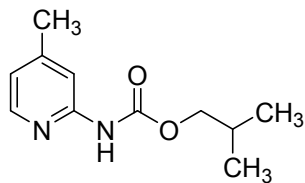

#### Isobutyl (4-methylpyridin-2-yl)carbamate 2e

White powder; 83% yield (35 mg); mp 113–114 °C. <sup>1</sup>H NMR (400 MHz, CDCl<sub>3</sub>): δ 8.59 (s, 1H), 8.17 (s, 1H), 7.87 (s, 1H), 6.83 (d, *J* = 5.2 Hz, 1H), 4.00 (d, *J* = 6.8 Hz, 2H), 2.38 (s, 3H), 2.12 – 1.97 (m, 1H), 1.00 (d, *J* = 6.8 Hz, 6H). <sup>13</sup>C NMR (101 MHz, CDCl<sub>3</sub>): δ 153.75, 152.20, 149.86, 147.19, 119.80, 112.97, 71.39, 28.01, 21.44, 19.07. HRMS (ESI), *m/z*: [M+H]<sup>+</sup> calcd. for C<sub>11</sub>H<sub>16</sub>N<sub>2</sub>O<sub>2</sub> 209.1285; found 209.1301.

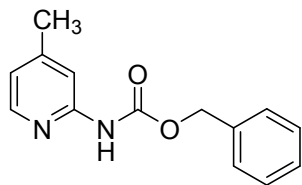

### Benzyl (4-methylpyridin-2-yl)carbamate 2f

White powder; 88% yield (43 mg); mp 145–146 °C. <sup>1</sup>H NMR (400 MHz, CDCl<sub>3</sub>): δ 8.98 (s, 1H), 8.22 – 8.08 (m, 1H), 7.95 (s, 1H), 6.86 (d, *J* = 4.8 Hz, 1H), 4.84 – 4.74 (m, 1H), 2.41 (s, 3H), 2.02 – 1.92 (m, 2H), 1.84 – 1.74 (m, 2H), 1.63 – 1.27 (m, 6H). <sup>13</sup>C NMR (101 MHz, CDCl<sub>3</sub>): δ 152.92, 151.74, 151.25, 145.57, 119.71, 113.30, 74.25, 31.88, 25.34, 23.81, 21.67. HRMS (ESI), *m/z*: [M+H]<sup>+</sup> calcd. for C<sub>14</sub>H<sub>14</sub>N<sub>2</sub>O<sub>2</sub> 243.1128; found: 243.1127.

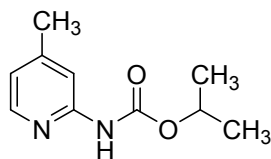

### Isopropyl (4-methylpyridin-2-yl)carbamate 2g

White powder; 87% yield (34 mg); mp 136–137 °C. <sup>1</sup>H NMR (400 MHz, CDCl<sub>3</sub>): δ 8.54 (s, 1H), 8.17 (d, *J* = 5.2 Hz, 1H), 7.87 (s, 1H), 6.82 (dd, *J* = 5.2, 1.6 Hz, 1H), 5.06 (hept, *J* = 6.4 Hz, 1H), 2.38 (s, 3H), 1.35 (d, *J* = 6.4 Hz, 6H). <sup>13</sup>C NMR (101 MHz, CDCl<sub>3</sub>): δ 153.41, 152.62, 149.81, 147.18, 119.51, 112.95, 68.70, 22.14, 22.12, 21.43. HRMS (ESI), *m/z*: [M+H]<sup>+</sup> calcd. for C<sub>10</sub>H<sub>14</sub>N<sub>2</sub>O<sub>2</sub> 195.1128; found 195.1130.

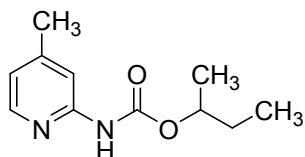

### sec-Butyl (4-methylpyridin-2-yl)carbamate 2h

White powder; 92% yield (38 mg); mp 93–94 °C. <sup>1</sup>H NMR (400 MHz, CDCl<sub>3</sub>): δ 9.45 (s, 1H), 8.19 (d, *J* = 5.2 Hz, 1H), 7.93 (s, 1H), 6.83 (dd, *J* = 5.2, 1.5 Hz, 1H), 4.89 (hept, *J* = 6.4 Hz, 1H), 2.39 (s, 3H), 1.77 – 1.58 (m, 2H), 1.32 (d, *J* = 6.4 Hz, 3H), 0.97 (t, *J* = 7.6 Hz, 3H). <sup>13</sup>C NMR (101 MHz, CDCl<sub>3</sub>): δ 153.45, 152.29, 150.34, 146.56, 119.59, 113.08, 73.51, 29.05, 21.51, 19.73, 9.72. HRMS (ESI), *m/z*: [M+H]<sup>+</sup> calcd. for C<sub>11</sub>H<sub>16</sub>N<sub>2</sub>O<sub>2</sub> 209.1285; found: 209.1284.

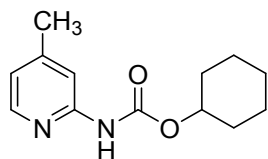

### Cyclohexyl (4-methylpyridin-2-yl)carbamate 2i

White powder; 74% yield (35 mg); mp 171–173 °C. <sup>1</sup>H NMR (400 MHz, CDCl<sub>3</sub>): δ 8.98 (s, 1H), 8.22 – 8.08 (m, 1H), 7.95 (s, 1H), 6.86 (d, *J* = 4.8 Hz, 1H), 4.84 – 4.74 (m, 1H), 2.41 (s, 3H), 2.02 – 1.92 (m, 2H), 1.84 – 1.74 (m, 2H), 1.63 – 1.27 (m, 6H). <sup>13</sup>C NMR (101 MHz, CDCl<sub>3</sub>): δ 152.92, 151.74, 151.25, 145.57, 119.71, 113.30, 74.25, 31.88, 25.34, 23.81, 21.67. HRMS (ESI), *m/z*: [M+H]<sup>+</sup> calcd. for C<sub>13</sub>H<sub>18</sub>N<sub>2</sub>O<sub>2</sub> 235.1441; found: 235.1438.

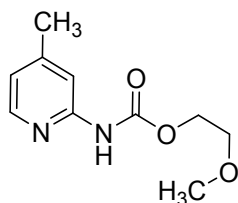

### 2-Methoxyethyl (4-methylpyridin-2-yl)carbamate 2j

Pale yellow powder; 63% yield (26 mg); mp 128–129 °C. <sup>1</sup>H NMR (400 MHz, CDCl<sub>3</sub>): δ 9.94 (s, 1H), 8.27 (d, *J* = 5.2 Hz, 1H), 7.90 (s, 1H), 6.83 (d, *J* = 4.8 Hz, 1H), 4.40 – 4.34 (m, 2H), 3.71 – 3.66 (m, 2H), 3.45 (s, 3H), 2.38 (s, 3H). <sup>13</sup>C NMR (101 MHz, CDCl<sub>3</sub>): δ 153.51, 152.16, 150.21, 147.04, 119.79, 112.96, 70.69, 64.14, 58.95, 21.50. HRMS (ESI), *m/z*: [M+H]<sup>+</sup> calcd. for C<sub>10</sub>H<sub>14</sub>N<sub>2</sub>O<sub>3</sub> 211.1077; found: 211.1079.

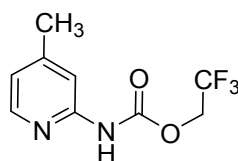

### 2,2,2-Trifluoroethyl (4-methylpyridin-2-yl)carbamate 2k

White powder; 53% yield (25 mg); mp 186–187 °C. <sup>1</sup>H NMR (400 MHz, CDCl<sub>3</sub>): δ 10.52 (br s, 1H), 8.24 (d, *J* = 5.2 Hz, 1H), 7.88 (s, 1H), 6.91 (dd, *J* = 5.2, 1.5 Hz, 1H), 4.63 (q, *J* = 8.4 Hz, 2H), 2.41 (s, 3H). <sup>13</sup>C NMR (101 MHz, CDCl<sub>3</sub>): δ 151.71, 151.60, 150.85, 146.70, 127.21 (q, *J* = 277 Hz), 120.45, 113.39, 61.50, 61.14, 60.77, 60.41, 21.53. <sup>19</sup>F NMR (376 MHz, CDCl<sub>3</sub>): δ –73.90. HRMS (ESI), *m/z*: [M+H]<sup>+</sup> calcd. for C<sub>9</sub>H<sub>9</sub>F<sub>3</sub>N<sub>2</sub>O<sub>2</sub> 235.0689; found 235.0688.

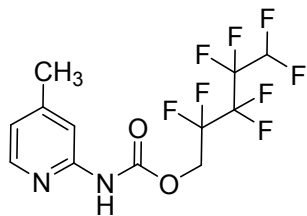

**2,2,3,3,4,4,5,5-Octafluoropentyl (4-methylpyridin-2-yl)carbamate 2l**

White powder; 64% yield (42 mg); mp 110–111 °C. <sup>1</sup>H NMR (400 MHz, CDCl<sub>3</sub>): δ 8.25 (d, *J* = 5.2 Hz, 1H), 7.90 (s, 1H), 6.91 (d, *J* = 5.2 Hz, 1H), 6.08 (tt, *J* = 51.8, 5.2 Hz, 1H), 4.77 (t, *J* = 14.0 Hz, 2H), 2.41 (s, 3H). <sup>13</sup>C NMR (101 MHz, CDCl<sub>3</sub>): δ 151.81, 151.59, 150.79, 146.79, 120.45, 114.70 (t, *J* = 31.7 Hz), 113.43, 110.11 (t, *J* = 31.1 Hz), 107.58 (t, *J* = 30.4 Hz), 105.05 (t, *J* = 32.9 Hz), 59.96 (t, *J* = 25.6 Hz), 21.49. <sup>19</sup>F NMR (376 MHz, CDCl<sub>3</sub>): δ -119.84 (m), -125.31 (m), -129.88 (m), -137.17 (m). HRMS (ESI), *m/z*: [M+H]<sup>+</sup> calcd. for C<sub>12</sub>H<sub>10</sub>F<sub>8</sub>N<sub>2</sub>O<sub>2</sub> 367.0687; found: 367.0689.

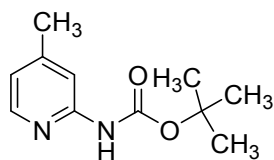

**tert-Butyl (4-methylpyridin-2-yl)carbamate 2m<sup>8</sup>**

White powder; 44% yield (18 mg); mp 114–116 °C. <sup>1</sup>H NMR (400 MHz, CDCl<sub>3</sub>): δ 8.95 (s, 1H), 8.17 (d, *J* = 5.2 Hz, 1H), 7.87 (s, 1H), 6.81 (dd, *J* = 5.2, 1.5 Hz, 1H), 2.37 (s, 3H), 1.56 (s, 9H). <sup>13</sup>C NMR (101 MHz, CDCl<sub>3</sub>): δ 152.75, 152.32, 150.19, 146.69, 119.43, 112.99, 80.88, 28.35, 21.48. HRMS (ESI), *m/z*: [M+H]<sup>+</sup> calcd. for C<sub>11</sub>H<sub>16</sub>N<sub>2</sub>O<sub>2</sub> 209.1285; found 209.1280.

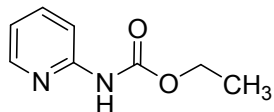

**Ethyl pyridin-2-ylcarbamate 2n<sup>9</sup>**

White powder; 90% yield (30 mg); mp 101–103 °C. <sup>1</sup>H NMR (400 MHz, CDCl<sub>3</sub>): δ 9.15 (s, 1H), 8.33 (ddd, *J* = 5.2, 2.0, 0.8 Hz, 1H), 8.08 (d, *J* = 8.4 Hz, 1H), 7.78 – 7.71 (m, 1H), 7.02 (ddd, *J* = 7.2, 5.2, 0.8 Hz, 1H), 4.29 (q, *J* = 7.2 Hz, 2H), 1.37 (t, *J* = 7.2 Hz, 3H). <sup>13</sup>C NMR (101 MHz, CDCl<sub>3</sub>): δ 153.40, 151.99, 146.84, 138.95, 118.51, 112.69, 61.46, 14.53. HRMS (ESI), *m/z*: [M+H]<sup>+</sup> calcd. for C<sub>8</sub>H<sub>10</sub>N<sub>2</sub>O<sub>2</sub> 167.0815; found 167.0813.

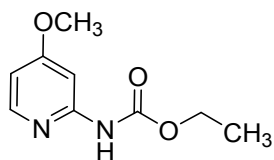

### Ethyl (4-methoxypyridin-2-yl)carbamate 2o

White powder; 89% yield (35 mg); mp 116–118 °C. <sup>1</sup>H NMR (400 MHz, CDCl<sub>3</sub>): δ 9.38 (br s, 1H), 8.14 – 8.01 (m, 1H), 7.78 – 7.68 (m, 1H), 6.65 – 6.56 (m, 1H), 4.29 (q, *J* = 7.2 Hz, 2H), 3.97 – 3.89 (m, 3H), 1.37 (td, *J* = 7.6, 0.8 Hz, 3H). <sup>13</sup>C NMR (101 MHz, CDCl<sub>3</sub>): δ 168.09, 153.80, 153.55, 147.19, 106.88, 96.84, 61.42, 55.45, 14.53. HRMS (ESI), *m/z*: [M+H]<sup>+</sup> calcd. for C<sub>9</sub>H<sub>12</sub>N<sub>2</sub>O<sub>3</sub> 197.0921; found 197.0939.

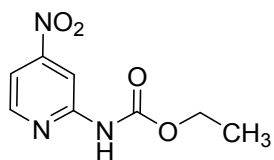

### Ethyl (4-nitropyridin-2-yl)carbamate 2p

Pale orange powder; 66% yield (28 mg); mp 118–120 °C. <sup>1</sup>H NMR (400 MHz, DMSO-*d*<sub>6</sub>): δ 10.83 (s, 1H), 8.62 (d, *J* = 5.4 Hz, 1H), 8.55 (d, *J* = 2.0 Hz, 1H), 7.76 (dd, *J* = 5.6, 2.1 Hz, 1H), 4.21 (q, *J* = 7.2 Hz, 2H), 1.27 (t, *J* = 7.2 Hz, 3H). <sup>13</sup>C NMR (101 MHz, DMSO-*d*<sub>6</sub>): δ 155.48, 154.83, 154.12, 151.05, 111.42, 105.13, 61.50, 14.82. HRMS (ESI), *m/z*: [M+H]<sup>+</sup> calcd. for C<sub>8</sub>H<sub>9</sub>N<sub>3</sub>O<sub>4</sub> 212.0666 found: 212.0671.

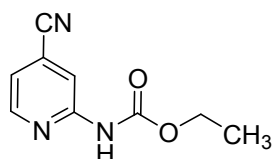

### Ethyl (4-cyanopyridin-2-yl)carbamate 2q

White powder; 64% yield (24 mg); mp 196–197 °C. <sup>1</sup>H NMR (400 MHz, CDCl<sub>3</sub>): δ 9.04 (s, 1H), 8.48 (d, *J* = 5.2 Hz, 1H), 8.36 (s, 1H), 7.22 (d, *J* = 5.2 Hz, 1H), 4.33 (q, *J* = 7.2 Hz, 2H), 1.39 (t, *J* = 7.2 Hz, 3H). <sup>13</sup>C NMR (101 MHz, CDCl<sub>3</sub>): δ 153.04, 152.91, 148.81, 122.63, 119.89, 116.53, 114.64, 62.06, 14.49. HRMS (ESI), *m/z*: [M+H]<sup>+</sup> calcd. for C<sub>9</sub>H<sub>9</sub>N<sub>3</sub>O<sub>2</sub> 192.0768; found 192.0769.

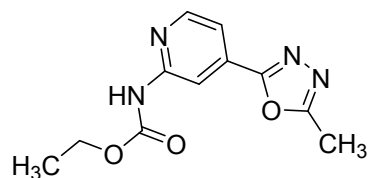

**Ethyl (4-(5-methyl-1,3,4-oxadiazol-2-yl)pyridin-2-yl)carbamate 2r**

White powder; 65% yield (32 mg); mp 216–217 °C. <sup>1</sup>H NMR (400 MHz, DMSO-*d*<sub>6</sub>): δ 10.23 (s, 1H), 8.48 (d, *J* = 5.2 Hz, 1H), 8.40 (s, 1H), 7.55 (dd, *J* = 5.2, 1.6 Hz, 1H), 4.21 (q, *J* = 7.2 Hz, 2H), 2.63 (s, 3H), 1.29 (t, *J* = 7.2 Hz, 3H). <sup>13</sup>C NMR (101 MHz, DMSO-*d*<sub>6</sub>): δ 165.44, 163.13, 154.14, 153.84, 149.94, 132.80, 115.20, 108.70, 61.22, 14.89, 11.17. HRMS (ESI), *m/z*: [M+H]<sup>+</sup> calcd. for C<sub>11</sub>H<sub>12</sub>N<sub>4</sub>O<sub>3</sub> 249.0982; found 249.0989.

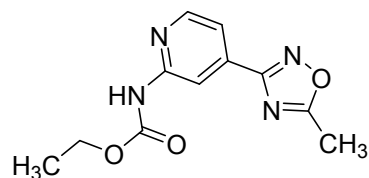

**Ethyl (4-(5-methyl-1,2,4-oxadiazol-3-yl)pyridin-2-yl)carbamate 2s**

White powder; 59% yield (29 mg); mp 205–207 °C. <sup>1</sup>H NMR (400 MHz, DMSO-*d*<sub>6</sub>): δ 10.24 (s, 1H), 8.52 – 8.41 (m, 2H), 7.57 (dd, *J* = 5.2, 1.5 Hz, 1H), 4.20 (q, *J* = 7.2 Hz, 2H), 2.70 (s, 3H), 1.28 (t, *J* = 7.2 Hz, 3H). <sup>13</sup>C NMR (101 MHz, DMSO-*d*<sub>6</sub>): δ 178.73, 166.98, 154.11, 153.82, 149.74, 135.86, 116.00, 109.84, 61.15, 14.90, 12.54. HRMS (ESI), *m/z*: [M+H]<sup>+</sup> calcd. for C<sub>11</sub>H<sub>12</sub>N<sub>4</sub>O<sub>3</sub> 249.0982; found 249.0985.

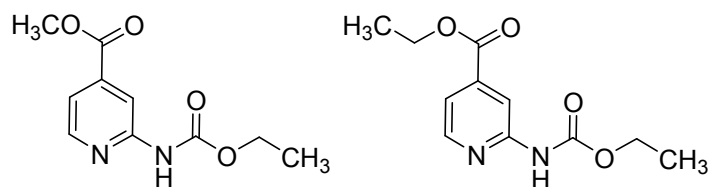

**Methyl 2-((ethoxycarbonyl)amino)isonicotinate 2t (69%) and ethyl 2-((ethoxycarbonyl)amino)isonicotinate 2t' (9%)**

The title compounds were obtained and characterized as a mixture.

**2t.** <sup>1</sup>H NMR (400 MHz, CDCl<sub>3</sub>): δ 9.62 (s, 1H), 8.62 (s, 1H), 8.48 (d, *J* = 5.2 Hz, 1H), 7.58 (dd, *J* = 5.2, 1.6 Hz, 1H), 4.32 (q, *J* = 7.2 Hz, 2H), 3.97 (s, 3H), 1.39 (t, *J* = 7.2 Hz, 3H). <sup>13</sup>C NMR (101

MHz, CDCl<sub>3</sub>):  $\delta$  165.44, 153.40, 153.16, 148.04, 140.0, 117.89, 112.31, 61.64, 52.73, 14.53. HRMS (ESI), m/z: [M+H]<sup>+</sup> calcd. for C<sub>10</sub>H<sub>12</sub>N<sub>2</sub>O<sub>4</sub> 225.0870; found 225.0874.

**2t**. <sup>1</sup>H NMR (400 MHz, CDCl<sub>3</sub>):  $\delta$  9.62 (s, 1H), 8.62 (s, 1H), 8.48 (d, *J* = 5.2 Hz, 1H), 7.58 (dd, *J* = 5.2, 1.6 Hz, 1H), 4.43 (q, *J* = 7.2 Hz, 2H), 4.32 (q, *J* = 7.2 Hz, 2H), 1.43 (t, *J* = 7.2 Hz, 3H), 1.39 (t, *J* = 7.2 Hz, 3H). <sup>13</sup>C NMR (101 MHz, CDCl<sub>3</sub>):  $\delta$  164.94, 153.10, 147.90, 140.51, 61.88, 61.64, 14.53, 14.21. HRMS (ESI), m/z: [M+H]<sup>+</sup> calcd. for C<sub>11</sub>H<sub>14</sub>N<sub>2</sub>O<sub>4</sub> 239.1026; found 239.1023.

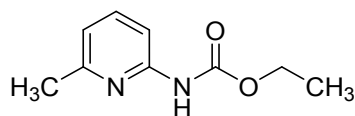

**Ethyl (6-methylpyridin-2-yl)carbamate 2u**<sup>10</sup>

White powder; 73% yield (26 mg); mp 58–59 °C. <sup>1</sup>H NMR (400 MHz, CDCl<sub>3</sub>):  $\delta$  7.77 (d, *J* = 8.3 Hz, 1H), 7.66 (s, 1H), 7.58 (t, *J* = 8.0 Hz, 1H), 6.85 (d, *J* = 7.6 Hz, 1H), 4.24 (q, *J* = 7.2 Hz, 2H), 2.46 (s, 3H), 1.32 (t, *J* = 7.2 Hz, 3H). <sup>13</sup>C NMR (101 MHz, CDCl<sub>3</sub>):  $\delta$  156.86, 153.33, 151.00, 138.53, 118.19, 109.11, 61.27, 23.93, 14.46. HRMS (ESI), m/z: [M+H]<sup>+</sup> calcd. for C<sub>9</sub>H<sub>12</sub>N<sub>2</sub>O<sub>2</sub> 203.0791; found 203.0801.

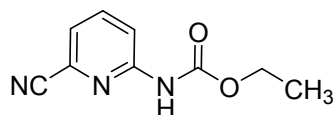

**Ethyl (6-cyanopyridin-2-yl)carbamate 2v**

Pale yellow powder; 78% yield (30 mg); mp 126–127 °C. <sup>1</sup>H NMR (400 MHz, CDCl<sub>3</sub>):  $\delta$  8.28 (d, *J* = 8.8 Hz, 1H), 7.82 (t, *J* = 8.0 Hz, 1H), 7.63 (br s, 1H), 7.40 (d, *J* = 7.6 Hz, 1H), 4.29 (q, *J* = 7.2 Hz, 2H), 1.36 (t, *J* = 7.2 Hz, 3H). <sup>13</sup>C NMR (101 MHz, CDCl<sub>3</sub>):  $\delta$  152.88, 152.67, 139.19, 131.50, 123.46, 116.81, 116.18, 62.03, 14.38. HRMS (ESI), m/z: [M+Na]<sup>+</sup> calcd. for C<sub>9</sub>H<sub>9</sub>N<sub>3</sub>O<sub>2</sub> 214.0587; found 214.0589.

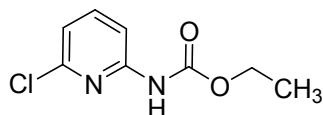

**Ethyl (6-chloropyridin-2-yl)carbamate 2w**

White powder; 71% yield (28 mg); mp 68–69 °C. <sup>1</sup>H NMR (400 MHz, CDCl<sub>3</sub>): δ 7.91 (d, *J* = 8.2 Hz, 1H), 7.65 (t, *J* = 7.8 Hz, 1H), 7.34 (br s, 1H), 7.03 (d, *J* = 7.6 Hz, 1H), 4.27 (q, *J* = 7.2 Hz, 2H), 1.34 (t, *J* = 7.2 Hz, 3H). <sup>13</sup>C NMR (101 MHz, CDCl<sub>3</sub>): δ 152.84, 151.43, 148.92, 140.86, 118.69, 110.31, 61.81, 14.43. HRMS (ESI), *m/z*: [M+H]<sup>+</sup> calcd. for C<sub>8</sub>H<sub>9</sub>ClN<sub>2</sub>O<sub>2</sub> 201.0425; found: 201.0439.

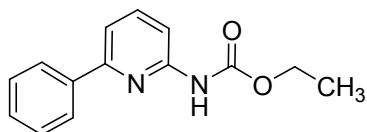

### Ethyl (6-phenylpyridin-2-yl)carbamate 2x

White powder; 62% yield (30 mg); mp 73–74 °C. <sup>1</sup>H NMR (400 MHz, CDCl<sub>3</sub>): δ 8.02 – 7.91 (m, 3H), 7.77 (t, *J* = 7.8 Hz, 1H), 7.66 (br s, 1H), 7.52 – 7.38 (m, 4H), 4.27 (q, *J* = 7.2 Hz, 2H), 1.34 (t, *J* = 7.2 Hz, 3H). <sup>13</sup>C NMR (101 MHz, CDCl<sub>3</sub>): δ 155.66, 153.29, 151.32, 139.16, 138.59, 129.10, 128.71, 126.79, 115.43, 110.59, 61.43, 14.49. HRMS (ESI), *m/z*: [M+H]<sup>+</sup> calcd. for C<sub>14</sub>H<sub>14</sub>N<sub>2</sub>O<sub>2</sub> 243.1128; found 243.1115.

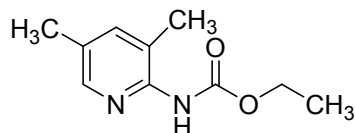

### Ethyl (3,5-dimethylpyridin-2-yl)carbamate 2y

White powder; 36% yield (14 mg); mp 73–74 °C. <sup>1</sup>H NMR (400 MHz, CDCl<sub>3</sub>): δ 8.09 (s, 1H), 7.37 (d, *J* = 2.0 Hz, 1H), 7.07 (s, 1H), 4.23 (q, *J* = 7.2 Hz, 2H), 2.29 (d, *J* = 6.4 Hz, 6H), 1.32 (t, *J* = 7.2 Hz, 3H). <sup>13</sup>C NMR (101 MHz, CDCl<sub>3</sub>): δ 154.05, 147.01, 145.92, 140.50, 130.79, 126.88, 61.43, 17.77, 17.66, 14.54. HRMS (ESI), *m/z*: [M+H]<sup>+</sup> calcd. for C<sub>10</sub>H<sub>14</sub>N<sub>2</sub>O<sub>2</sub> 195.1128; found 195.1127.

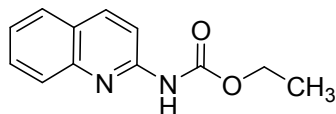

### Ethyl quinolin-2-ylcarbamate 3a<sup>11</sup>

Pale yellow powder; 54% yield (23 mg); mp 98–99 °C. <sup>1</sup>H NMR (400 MHz, CDCl<sub>3</sub>): δ 8.27 (d, *J* = 9.2 Hz, 1H), 8.19 (d, *J* = 9.2 Hz, 1H), 7.96 (br s, 1H), 7.85 (d, *J* = 8.4 Hz, 1H), 7.79 (d, *J* = 8.0



Hz, 1H), 7.72 – 7.65 (m, 1H), 7.46 (t,  $J = 7.6$  Hz, 1H), 4.30 (q,  $J = 7.2$  Hz, 2H), 1.36 (t,  $J = 7.2$  Hz, 3H).  $^{13}\text{C}$  NMR (101 MHz,  $\text{CDCl}_3$ ):  $\delta$  153.52, 151.19, 146.09, 138.94, 130.07, 127.54, 126.93, 125.72, 124.96, 112.97, 61.65, 14.40. HRMS (ESI),  $m/z$ :  $[\text{M}+\text{H}]^+$  calcd. for  $\text{C}_{12}\text{H}_{12}\text{N}_2\text{O}_2$  217.0972; found 217.0988.

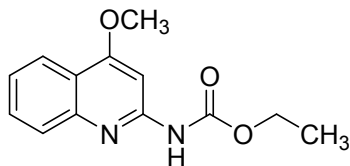

### Ethyl (4-methoxyquinolin-2-yl)carbamate **3b**

White powder; 72% yield (35 mg); mp 156–158 °C.  $^1\text{H}$  NMR (400 MHz,  $\text{CDCl}_3$ ):  $\delta$  8.11 (d,  $J = 8.0$  Hz, 1H), 7.97 (s, 1H), 7.80 – 7.71 (m, 2H), 7.67 – 7.61 (m, 1H), 7.39 (t,  $J = 8.4$  Hz, 1H), 4.28 (q,  $J = 7.2$  Hz, 2H), 4.11 (s, 3H), 1.34 (t,  $J = 7.2$  Hz, 3H).  $^{13}\text{C}$  NMR (101 MHz,  $\text{CDCl}_3$ ):  $\delta$  163.98, 153.92, 152.84, 147.29, 130.03, 126.91, 123.83, 121.80, 119.32, 91.89, 61.35, 55.88, 14.35. HRMS (ESI),  $m/z$ :  $[\text{M}+\text{H}]^+$  calcd. for  $\text{C}_{13}\text{H}_{14}\text{N}_2\text{O}_3$  247.1077; found 247.1078.

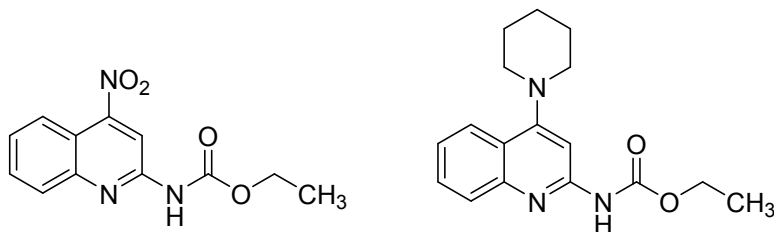

### Ethyl (4-nitroquinolin-2-yl)carbamate **3c** (57%) and ethyl (4-(piperidin-1-yl)quinolin-2-yl)carbamate **3c'** (25%)

The title compounds were obtained and characterized as a mixture.

**3c**.  $^1\text{H}$  NMR (400 MHz,  $\text{CDCl}_3$ ):  $\delta$  8.83 (s, 1H), 8.25 (d,  $J = 8.5$  Hz, 2H + br s, 1H), 7.95 (d,  $J = 8.5$  Hz, 1H), 7.79 (ddd,  $J = 8.4, 6.9, 1.4$  Hz, 1H), 7.63 (ddd,  $J = 8.4, 6.8, 1.2$  Hz, 1H), 4.32 (q,  $J = 7.2$  Hz, 2H), 1.35 (t,  $J = 7.2$  Hz, 3H).  $^{13}\text{C}$  NMR (101 MHz,  $\text{CDCl}_3$ ):  $\delta$  154.54, 153.15, 150.66, 148.39, 131.38, 128.01, 127.52, 122.72, 116.52, 107.75, 62.22, 14.37. HRMS (ESI),  $m/z$ :  $[\text{M}+\text{H}]^+$  calcd. for  $\text{C}_{12}\text{H}_{11}\text{N}_3\text{O}_4$  262.0822; found 262.0829.

**3c'**.  $^1\text{H}$  NMR (400 MHz,  $\text{CDCl}_3$ ):  $\delta$  8.30 – 8.12 (br s, 1H), 7.95 (m, 1H), 7.77 (m, 2H), 7.63 (m, 1H), 7.39 – 7.34 (m, 1H), 4.25 (q,  $J = 7.2$  Hz, 2H), 3.26 (t,  $J = 5.2$  Hz, 4H), 1.87 (m, 4H), 1.73 (m, 2H), 1.30 (t,  $J = 7.2$  Hz, 3H).  $^{13}\text{C}$  NMR (101 MHz,  $\text{CDCl}_3$ ):  $\delta$  160.31, 132.48, 129.51,

129.34, 124.62, 123.96, 123.40, 123.16, 121.45, 104.21, 61.39, 53.66, 26.09, 24.52, 14.45. HRMS (ESI),  $m/z$ :  $[M+H]^+$  calcd. for  $C_{17}H_{21}N_3O_2$  300.1707; found 300.1711.

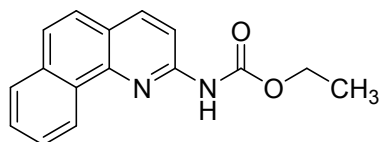

### Ethyl benzo[*h*]quinolin-2-ylcarbamate **3e**

Yellow powder; 68% yield (36 mg); mp 104–105 °C.  $^1H$  NMR (400 MHz, Acetone- $d_6$ ):  $\delta$  9.25 (s, 1H), 9.18 – 9.10 (m, 1H), 8.37 – 8.32 (m, 2H), 8.01 – 7.94 (m, 1H), 7.82 – 7.77 (m, 2H), 7.73 – 7.66 (m, 2H), 4.29 (q,  $J = 7.2$  Hz, 2H), 1.34 (t,  $J = 7.2$  Hz, 3H).  $^{13}C$  NMR (101 MHz, Acetone- $d_6$ ):  $\delta$  153.65, 151.12, 144.87, 138.14, 134.09, 130.65, 128.03, 127.78, 126.32, 125.40, 125.16, 124.21, 123.04, 112.35, 60.87, 13.96. HRMS (ESI),  $m/z$ :  $[M+H]^+$  calcd. for  $C_{16}H_{14}N_2O_2$  267.1128; found 267.1127.

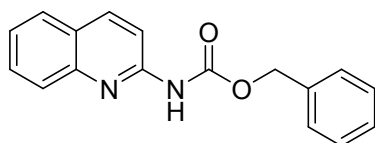

### Benzyl quinolin-2-ylcarbamate **3f**<sup>12</sup>

Yellow powder; 73% yield (41 mg); mp 103–104 °C.  $^1H$  NMR (400 MHz,  $CDCl_3$ ):  $\delta$  8.26 (d,  $J = 8.8$  Hz, 1H), 8.22 – 8.11 (m, 2H), 7.84 (d,  $J = 8.4$  Hz, 1H), 7.78 (dd,  $J = 8.0, 1.6$  Hz, 1H), 7.68 – 7.61 (m, 1H), 7.48 – 7.33 (m, 6H), 5.27 (s, 2H).  $^{13}C$  NMR (101 MHz, Acetone- $d_6$ ):  $\delta$  153.67, 151.69, 146.94, 138.21, 136.68, 129.71, 128.42, 127.99, 127.92, 127.60, 127.38, 125.81, 124.68, 112.96, 66.42. HRMS (ESI),  $m/z$ :  $[M+H]^+$  calcd. for  $C_{17}H_{14}N_2O_2$  279.1128; found 279.1127.

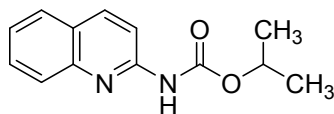

### Isopropyl quinolin-2-ylcarbamate **3g**<sup>12</sup>

Pale yellow powder; 80% yield (37 mg); mp 100–101 °C.  $^1H$  NMR (400 MHz,  $CDCl_3$ ):  $\delta$  8.46 (br s, 1H), 8.28 (d,  $J = 8.8$  Hz, 1H), 8.18 (d,  $J = 8.8$  Hz, 1H), 7.88 (dd,  $J = 8.4, 2.8$  Hz, 1H), 7.78 (d,  $J = 8.0$  Hz, 1H), 7.67 (t,  $J = 7.6$  Hz, 1H), 7.45 (t,  $J = 7.6$  Hz, 1H), 5.11 – 5.02 (m, 1H), 1.33 – 1.26 (m, 6H).  $^{13}C$  NMR (101 MHz,  $CDCl_3$ ):  $\delta$  153.15, 151.26, 146.23, 138.81, 130.01, 127.52,

127.50, 127.01, 125.71, 124.88, 113.01, 69.35, 21.95. HRMS (ESI),  $m/z$ :  $[M+H]^+$  calcd. for  $C_{13}H_{14}N_2O_2$  231.1128; found 231.1129.

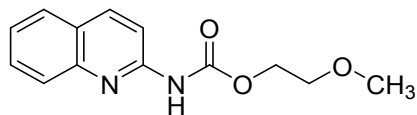

### 2-Methoxyethyl quinolin-2-ylcarbamate 3h

Pale yellow powder; 71% yield (35 mg); mp 60–62 °C.  $^1H$  NMR (400 MHz,  $CDCl_3$ ):  $\delta$  8.25 (d,  $J$  = 8.8 Hz, 1H), 8.17 (d,  $J$  = 8.8 Hz, 1H), 7.87 (d,  $J$  = 8.4 Hz, 1H), 7.77 (d,  $J$  = 8.0 Hz, 1H), 7.71 – 7.62 (m, 1H), 7.44 (t,  $J$  = 7.2 Hz, 1H), 4.45 – 4.32 (m, 2H), 3.67 – 3.58 (m, 2H), 3.38 (s, 3H).  $^{13}C$  NMR (101 MHz,  $CDCl_3$ ):  $\delta$  153.42, 151.03, 146.54, 138.64, 129.90, 127.48, 127.33, 125.85, 124.90, 112.97, 70.49, 64.50, 58.98. HRMS (ESI),  $m/z$ :  $[M+H]^+$  calcd. for  $C_{13}H_{14}N_2O_3$  247.1077; found 247.1078.

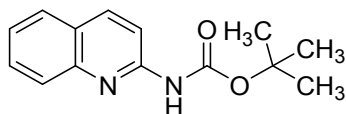

### tert-Butyl quinolin-2-ylcarbamate 3j<sup>13</sup>

Yellow oil; 39% yield (19 mg).  $^1H$  NMR (400 MHz,  $CDCl_3$ ):  $\delta$  8.22 (d,  $J$  = 8.8 Hz, 1H), 8.15 (d,  $J$  = 8.8 Hz, 1H), 7.79 – 7.71 (m, 2H), 7.69 – 7.63 (m, 1H), 7.46 – 7.41 (m, 1H), 1.56 (s, 9H).  $^{13}C$  NMR (101 MHz,  $CDCl_3$ ):  $\delta$  152.53, 151.34, 146.78, 138.33, 129.81, 127.52, 127.49, 127.26, 125.78, 124.65, 112.94, 81.23, 28.25. HRMS (ESI),  $m/z$ :  $[M+H]^+$  calcd. for  $C_{14}H_{16}N_2O_3$  245.1285; found 245.1279.

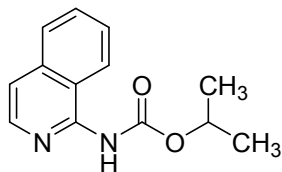

### Isopropyl isoquinolin-1-ylcarbamate 3k

White powder; 27% yield (12 mg); mp 166–168 °C.  $^1H$  NMR (400 MHz,  $CDCl_3$ ):  $\delta$  8.64 (d,  $J$  = 8.0 Hz, 1H), 7.79 – 7.57 (m, 4H), 7.15 (d,  $J$  = 6.4 Hz, 1H), 5.15 – 5.04 (m, 1H), 1.39 (d,  $J$  = 6.0 Hz, 6H).  $^{13}C$  NMR (101 MHz,  $CDCl_3$ ):  $\delta$  137.25, 132.45, 130.94, 127.64, 126.72, 126.54,

124.00, 114.10, 69.20, 22.09. HRMS (ESI), m/z:  $[M+Na]^+$  calcd. for  $C_{13}H_{14}N_2O_2$  253.0947; found 253.0957.

#### 4. $^1\text{H}$ , $^{13}\text{C}$ , and $^{19}\text{F}$ NMR spectra of compounds 1, 2, and 3

$^1\text{H}$  and  $^{13}\text{C}$  spectra of 1,1-dimethyl-3-(4-methylpyridin-2-yl)urea **1a**.

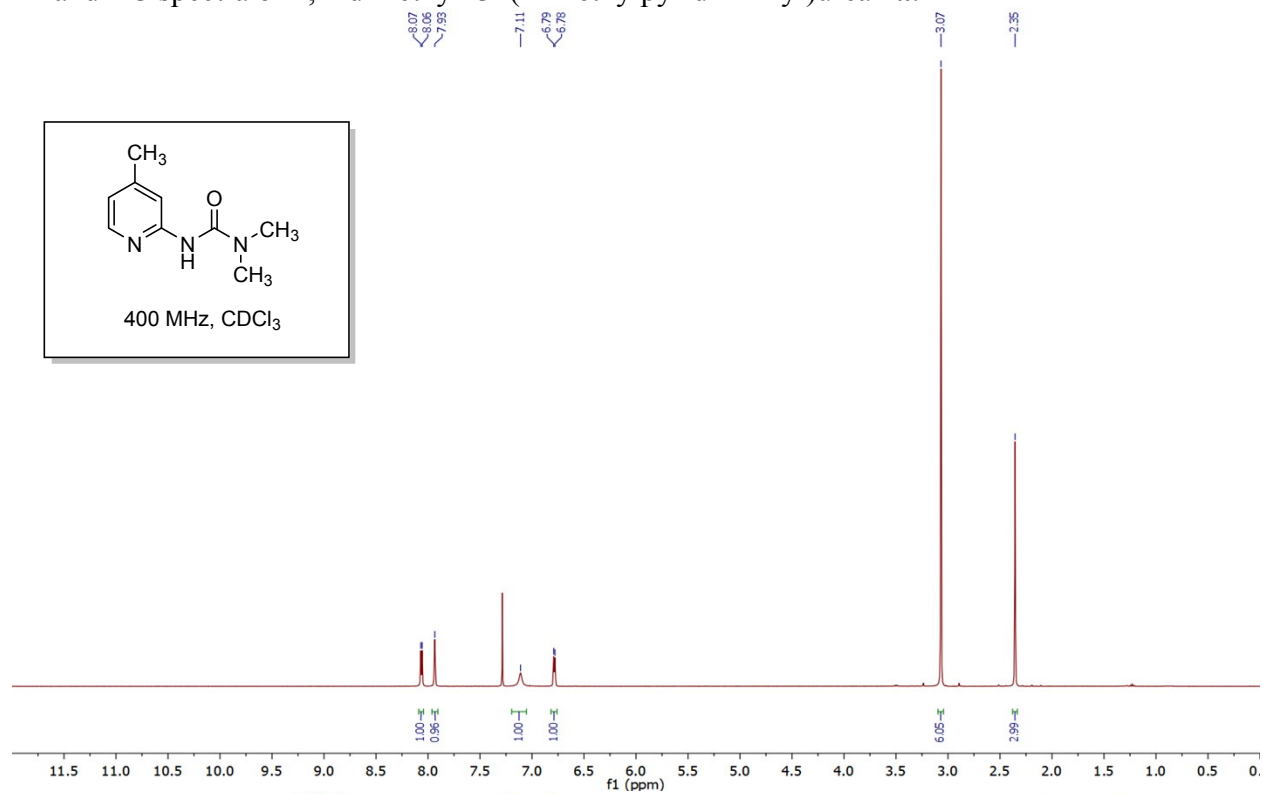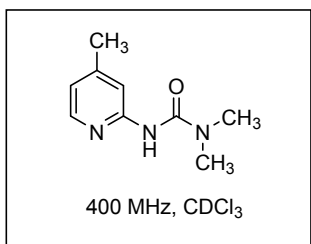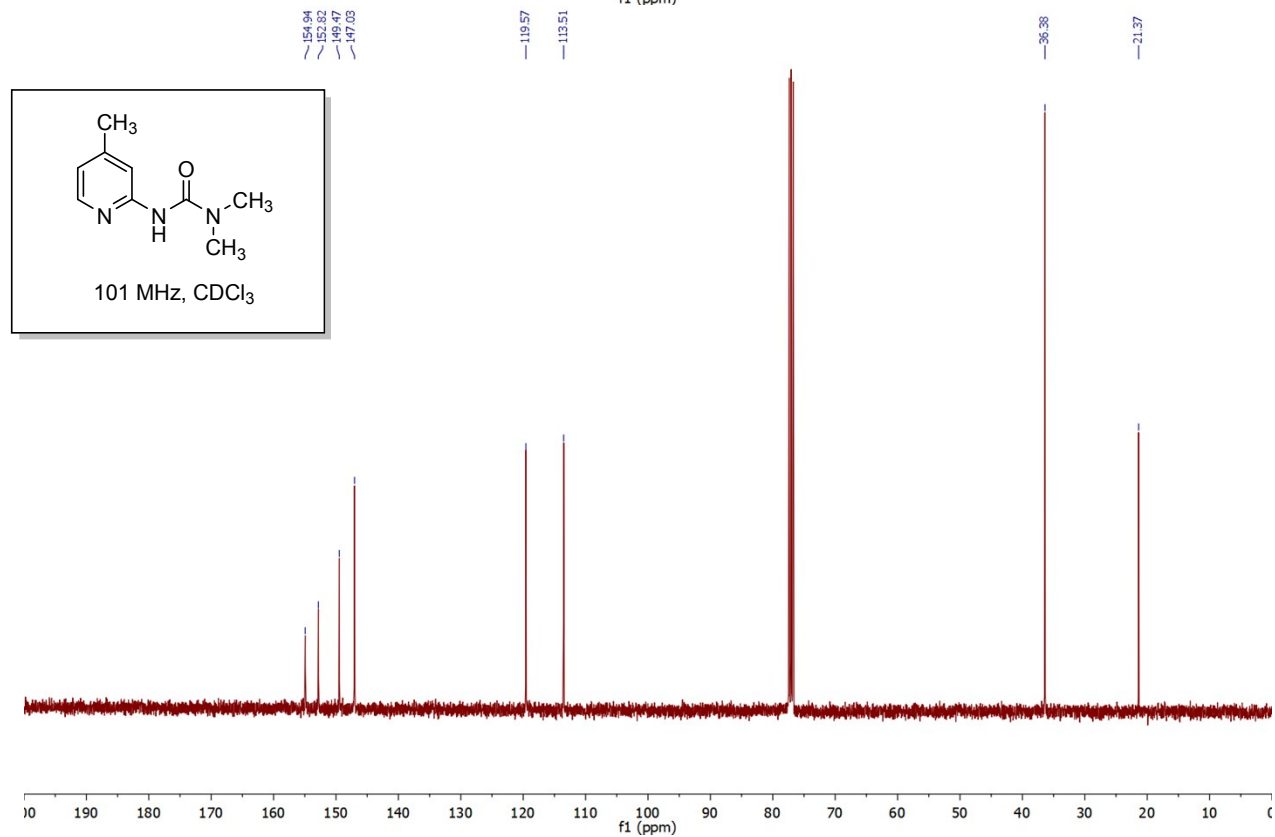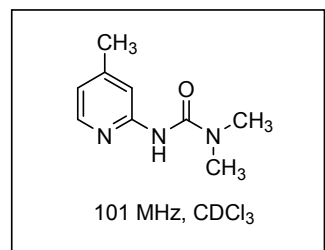

$^1\text{H}$  and  $^{13}\text{C}$  spectra of *N*-(4-methylpyridin-2-yl)morpholine-4-carboxamide **1b**.

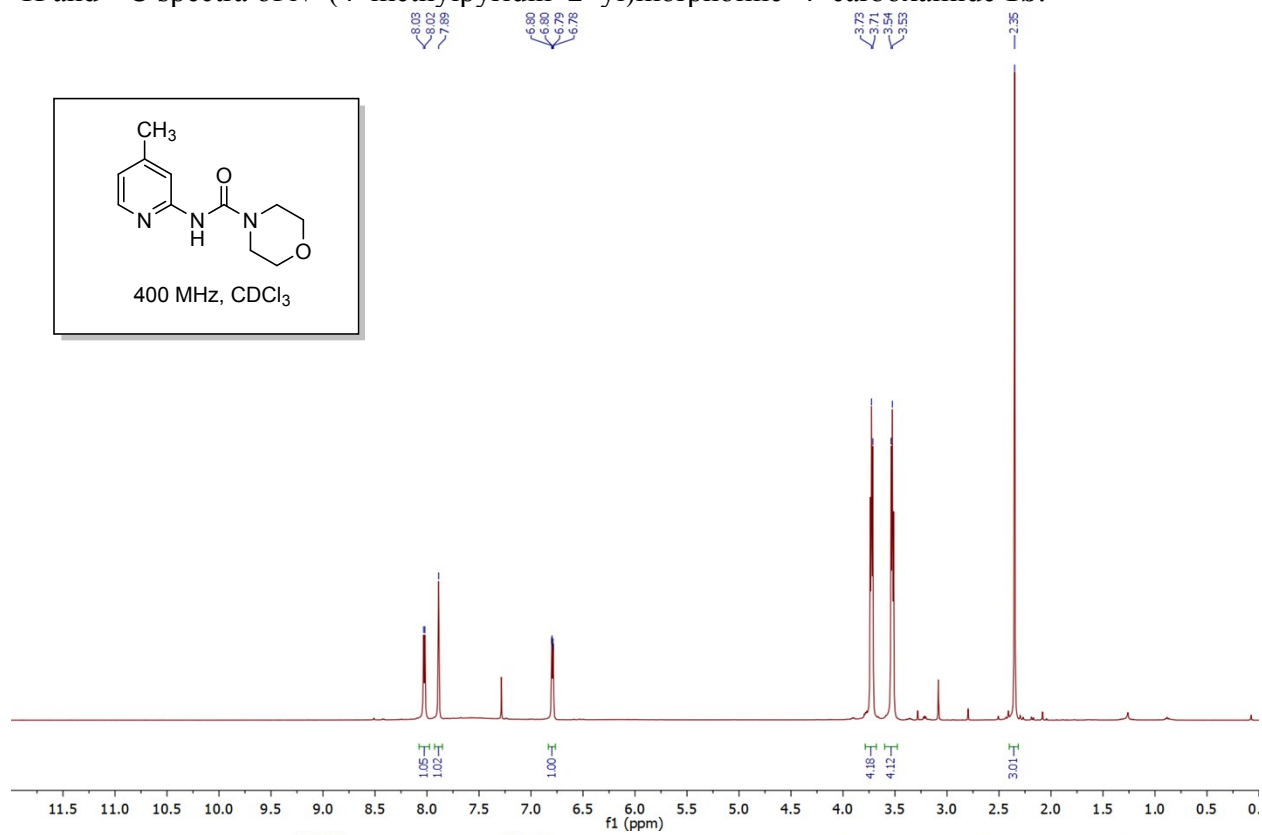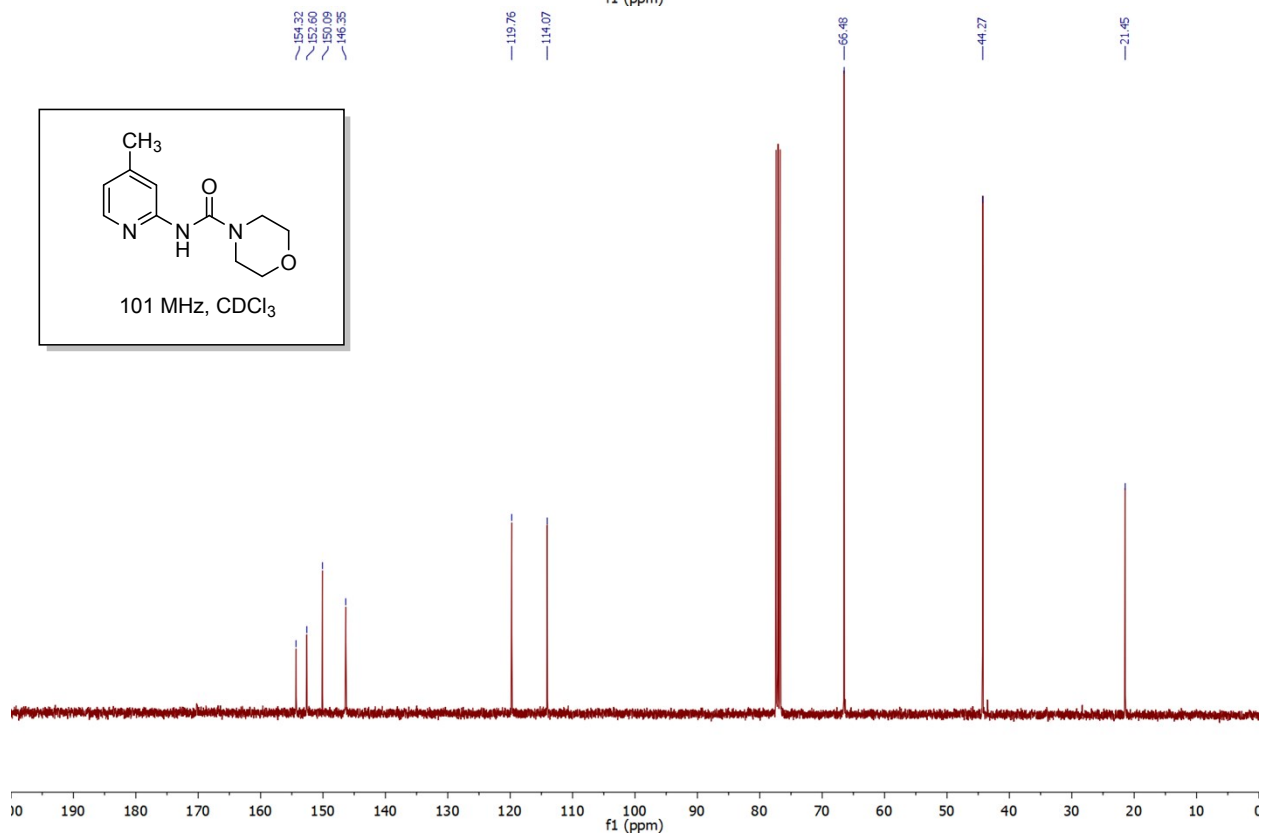

$^1\text{H}$  and  $^{13}\text{C}$  spectra of *N*-(4-methylpyridin-2-yl)piperidine-1-carboxamide **1c**.

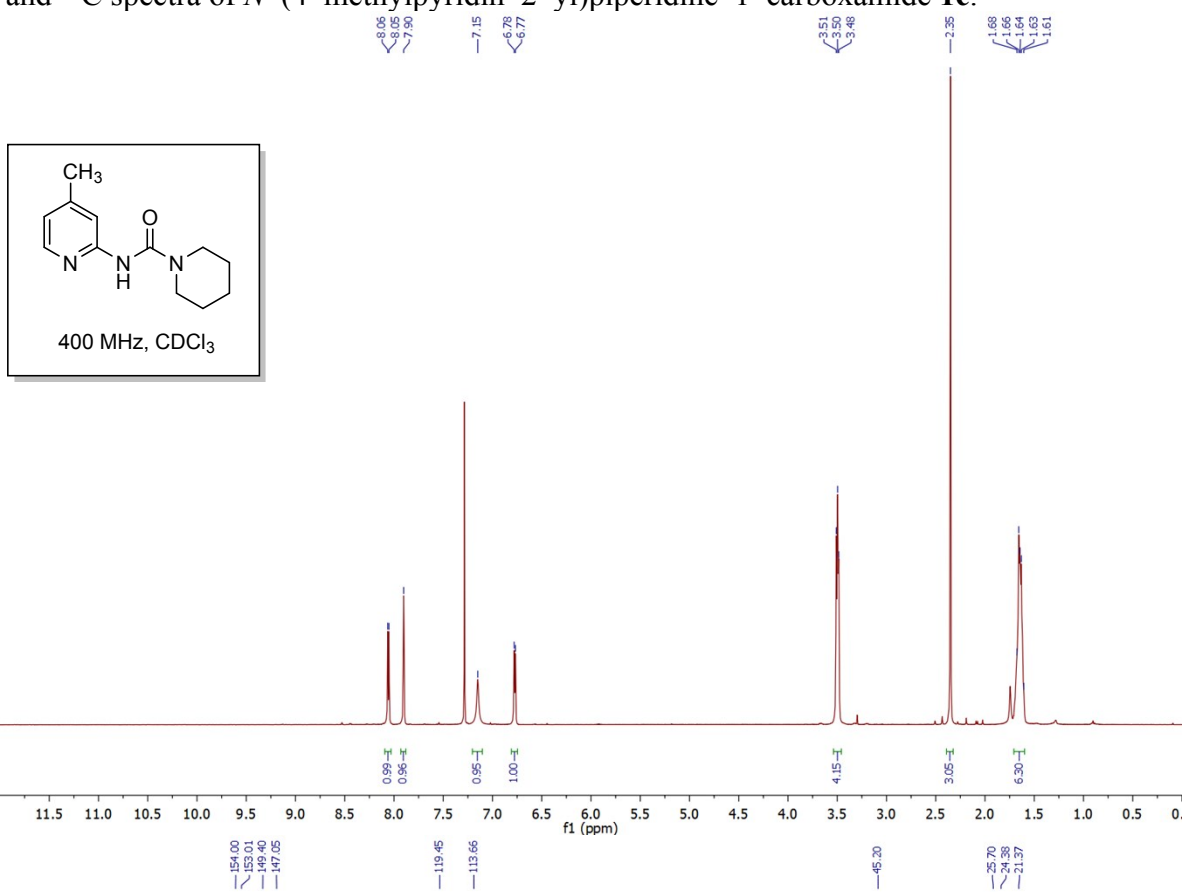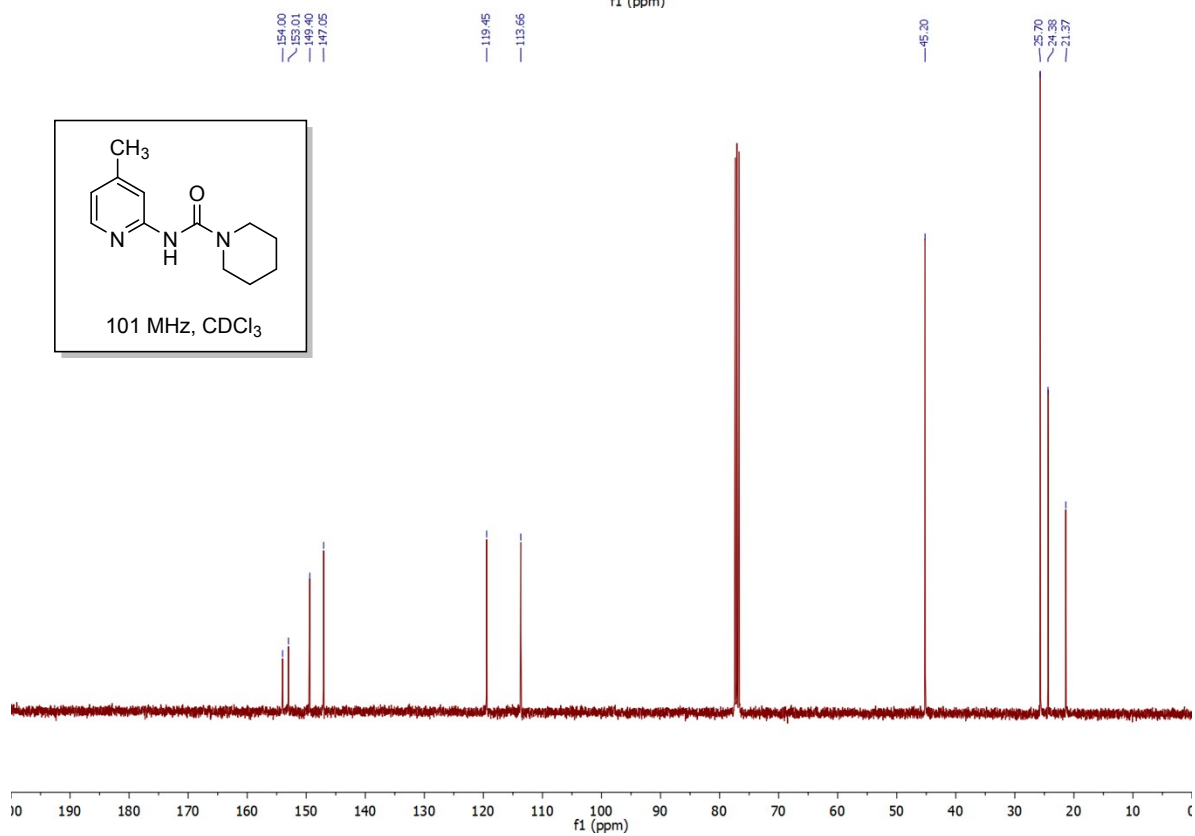

$^1\text{H}$  and  $^{13}\text{C}$  spectra of *N*-(pyridin-2-yl)piperidine-1-carboxamide **1d**.

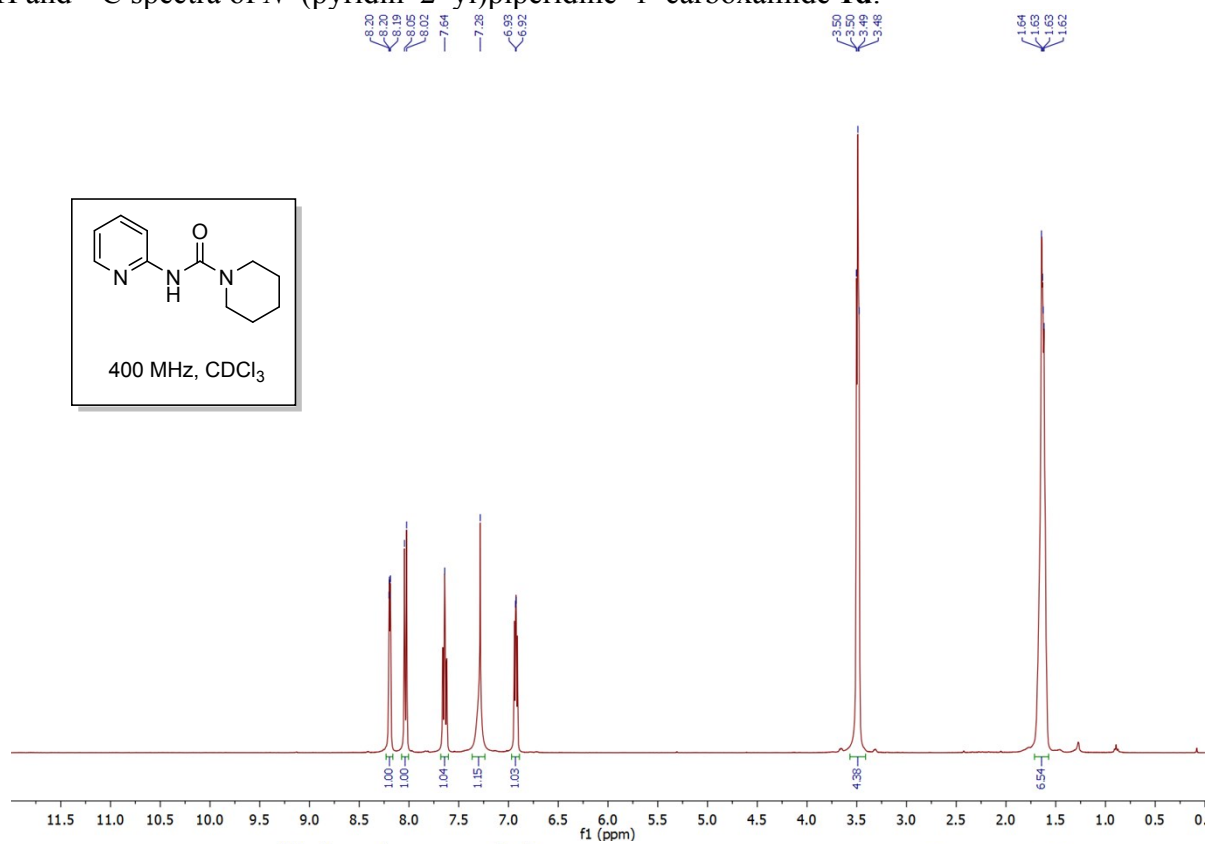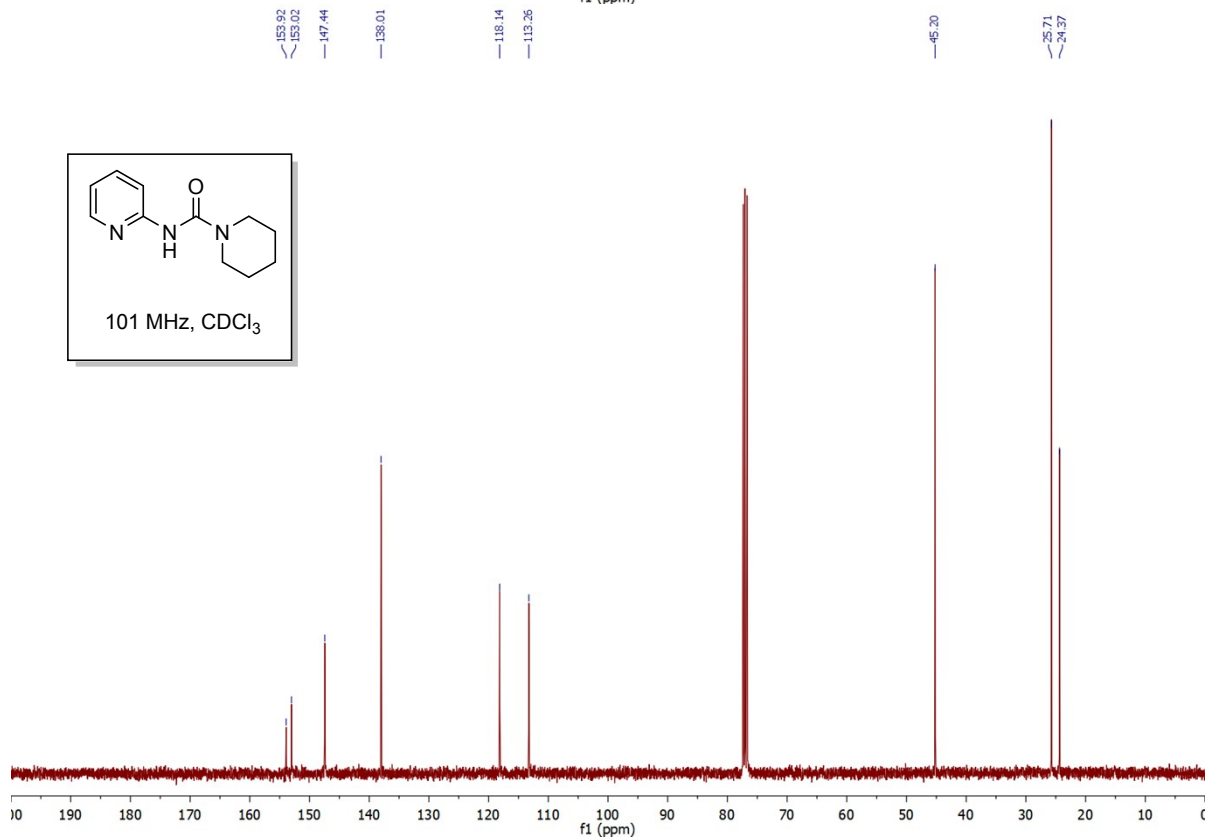



$^1\text{H}$  and  $^{13}\text{C}$  spectra of *N*-(4-methoxypyridin-2-yl)piperidine-1-carboxamide **1e**.

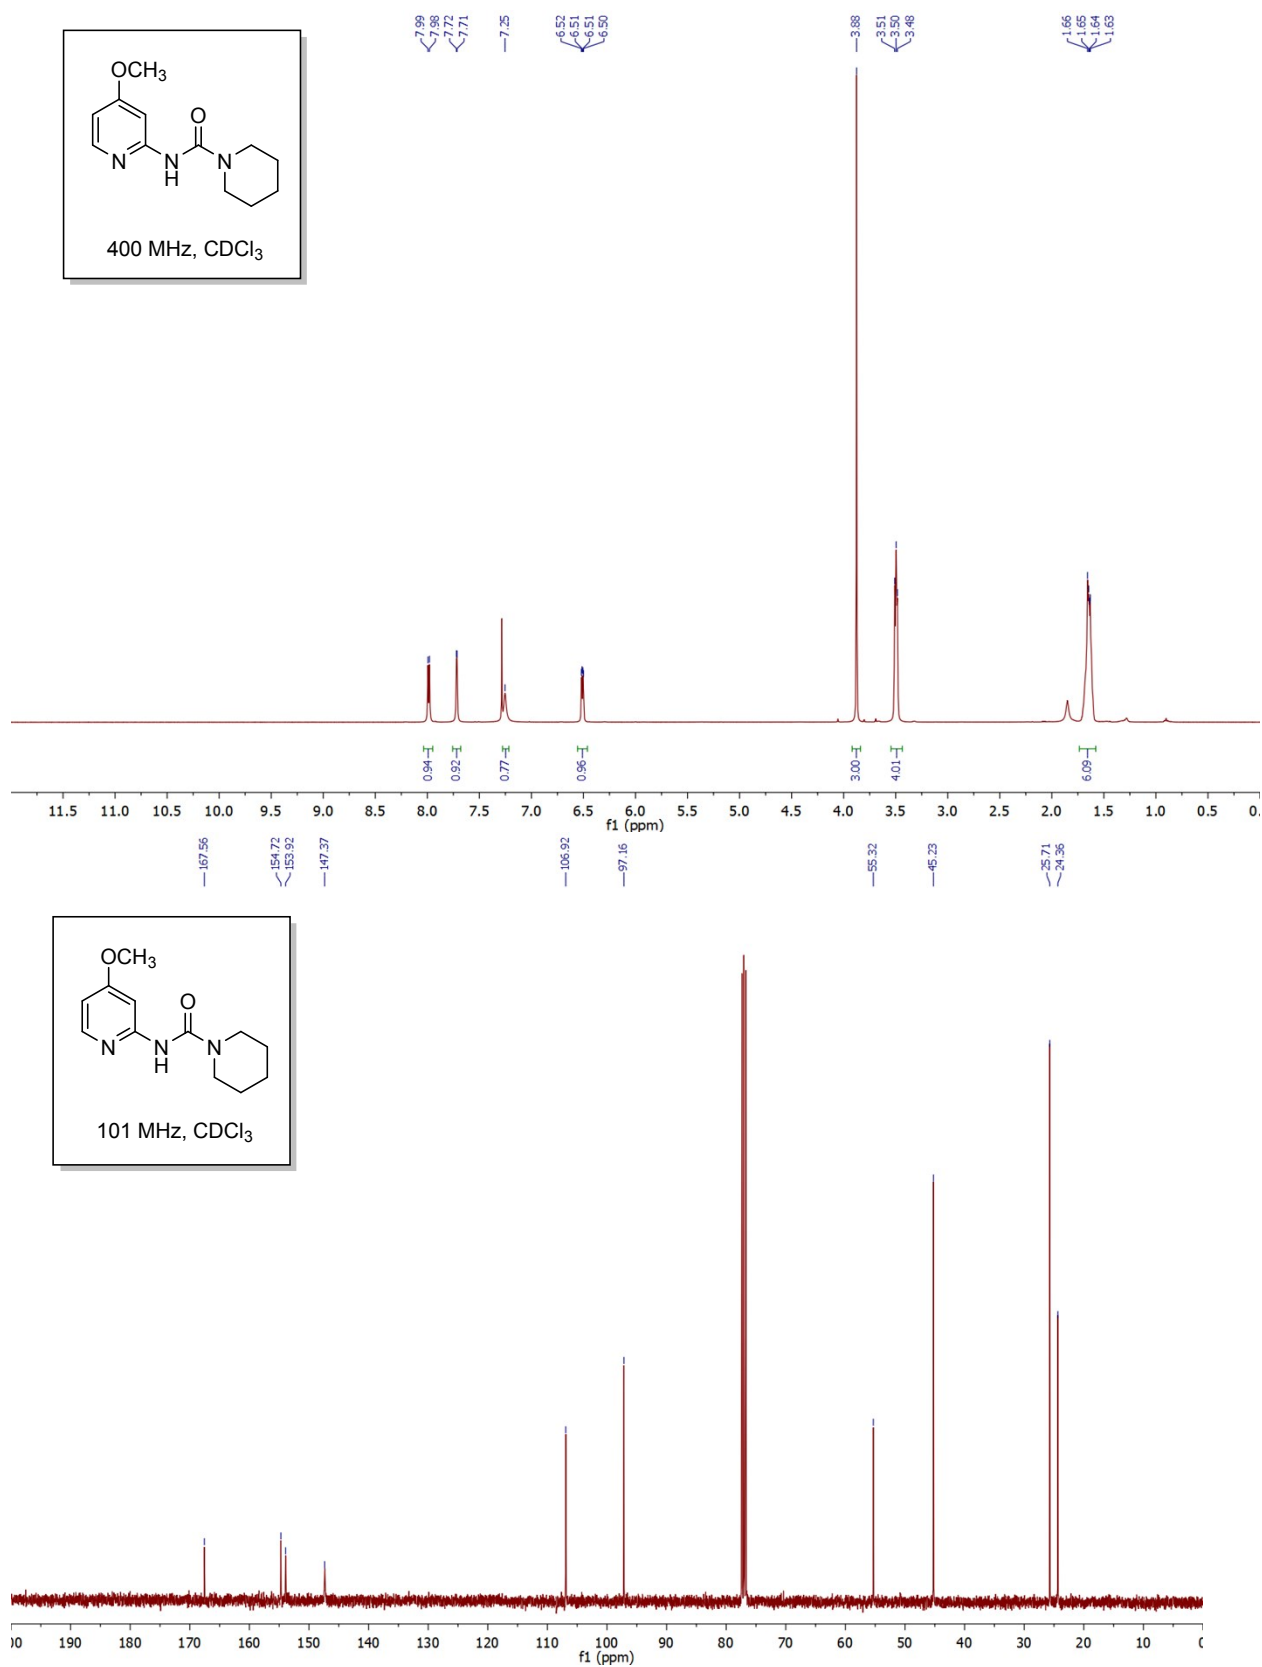

$^1\text{H}$  and  $^{13}\text{C}$  spectra of *N*-(4-nitropyridin-2-yl)piperidine-1-carboxamide **1f**.

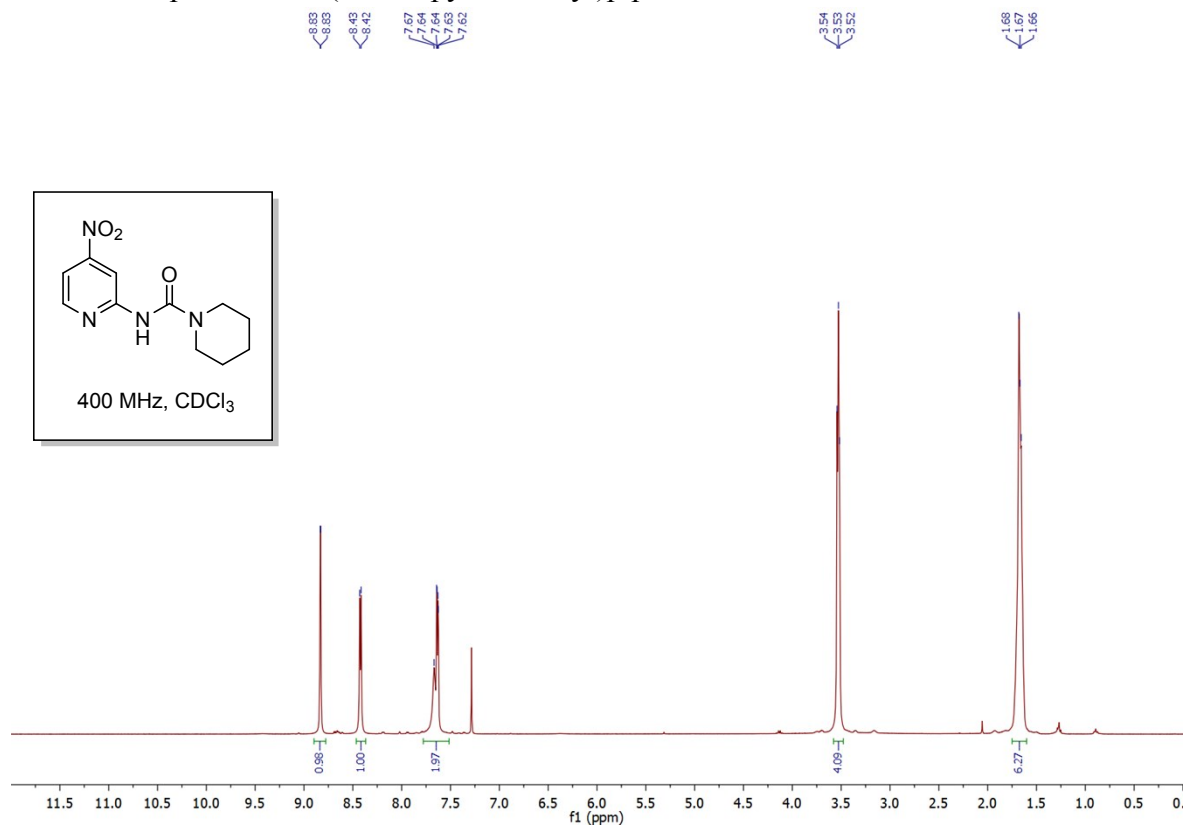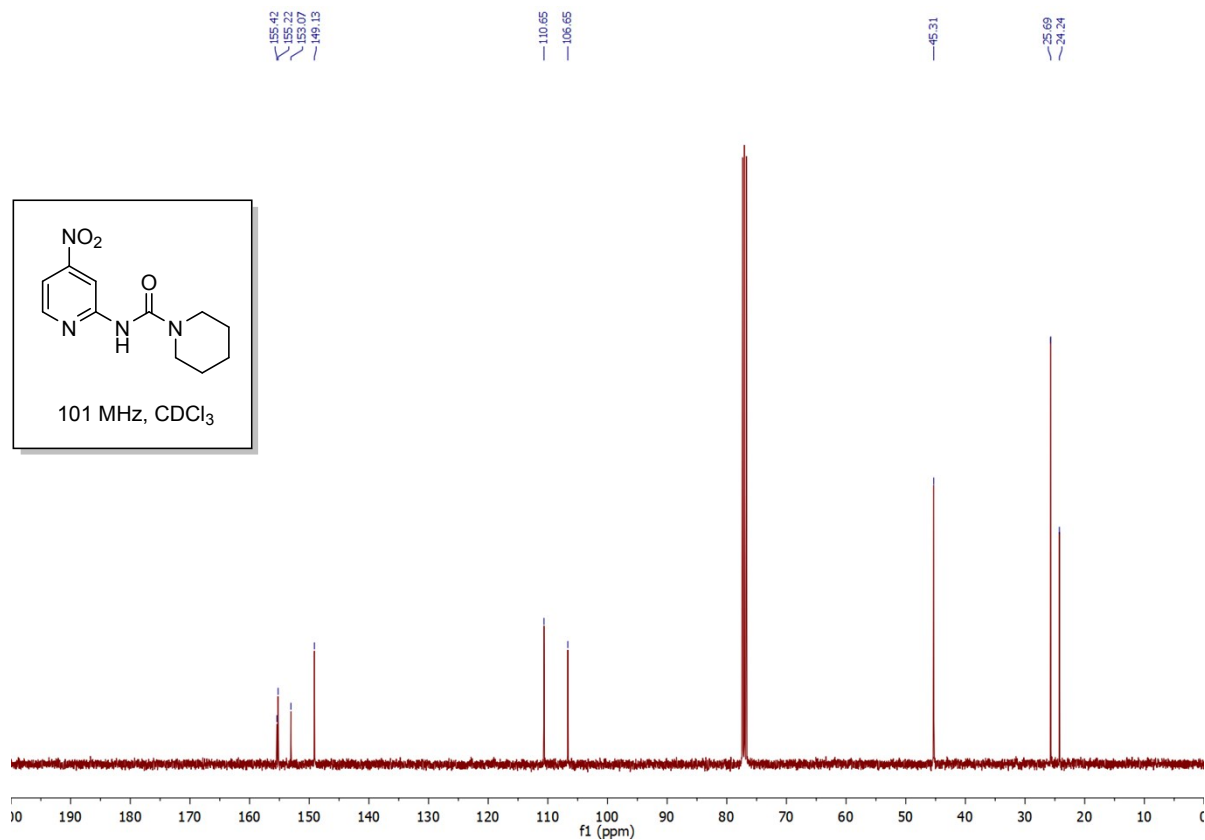

$^1\text{H}$  and  $^{13}\text{C}$  spectra of *N*-(4-cyanopyridin-2-yl)piperidine-1-carboxamide **1g**.

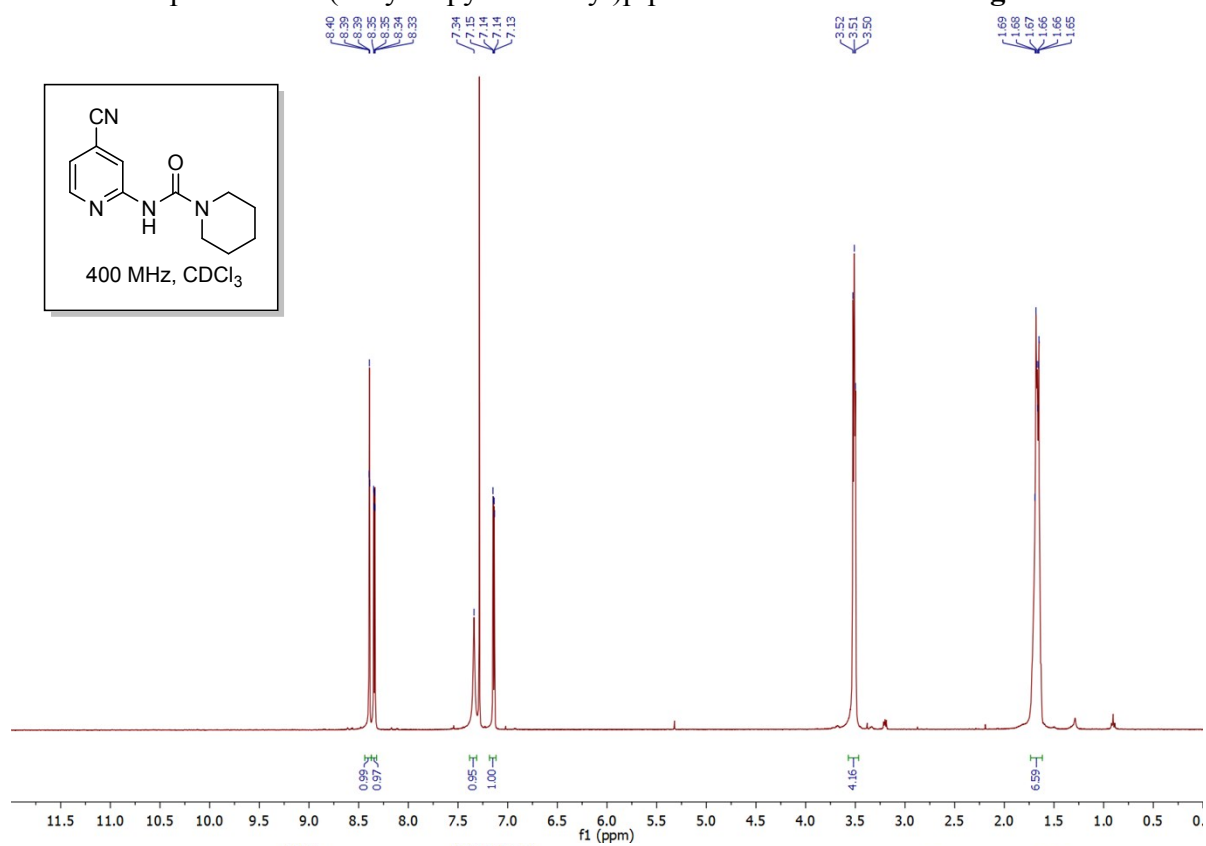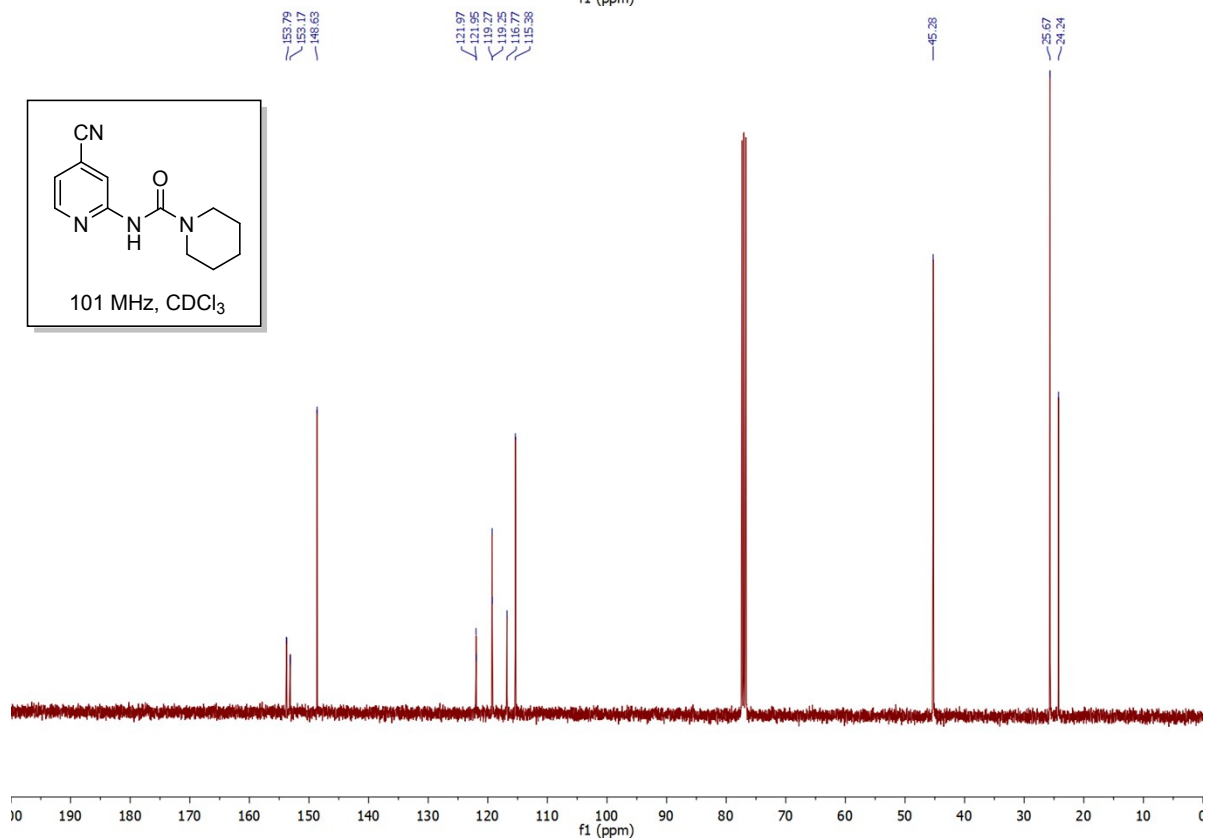

$^1\text{H}$  and  $^{13}\text{C}$  spectra of *N*-(4-(5-methyl-1,3,4-oxadiazol-2-yl)pyridin-2-yl)piperidine-1-carboxamide **1h**.

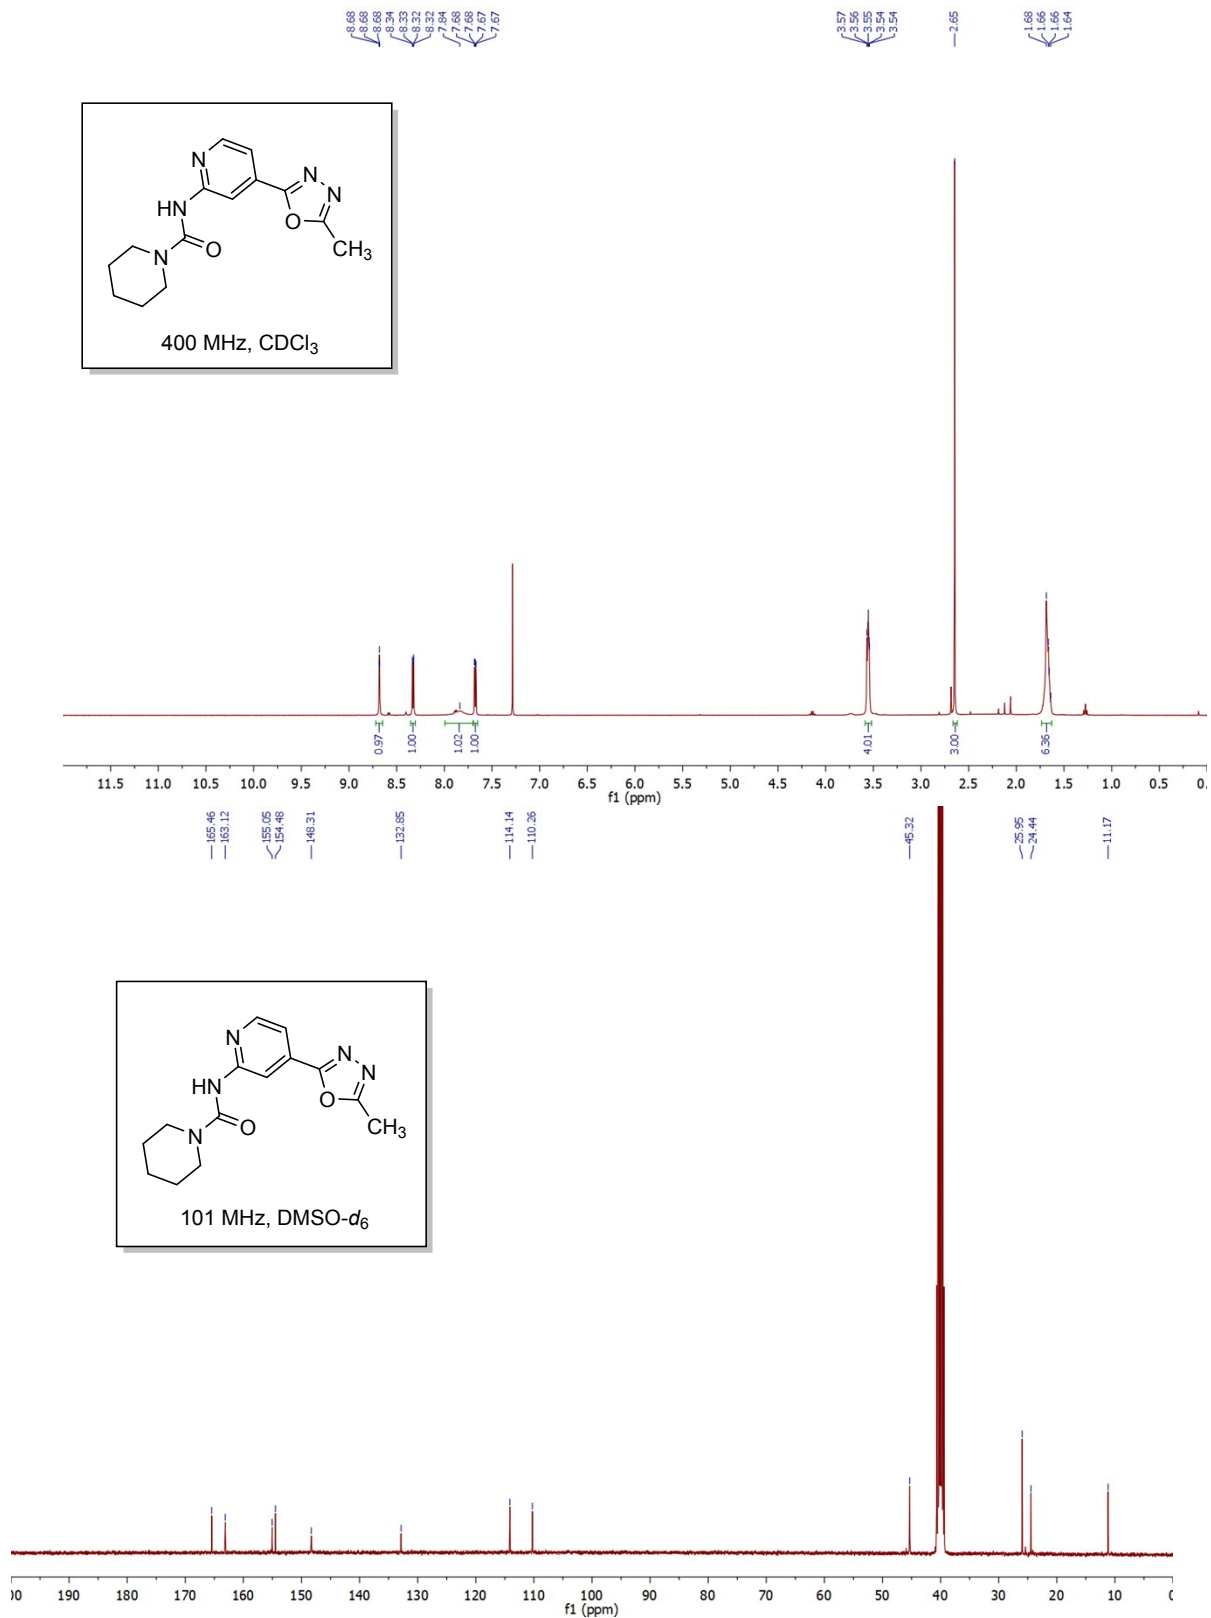

$^1\text{H}$  and  $^{13}\text{C}$  spectra of *N*-(4-(5-methyl-1,2,4-oxadiazol-3-yl)pyridin-2-yl)piperidine-1-carboxamide **1i**.

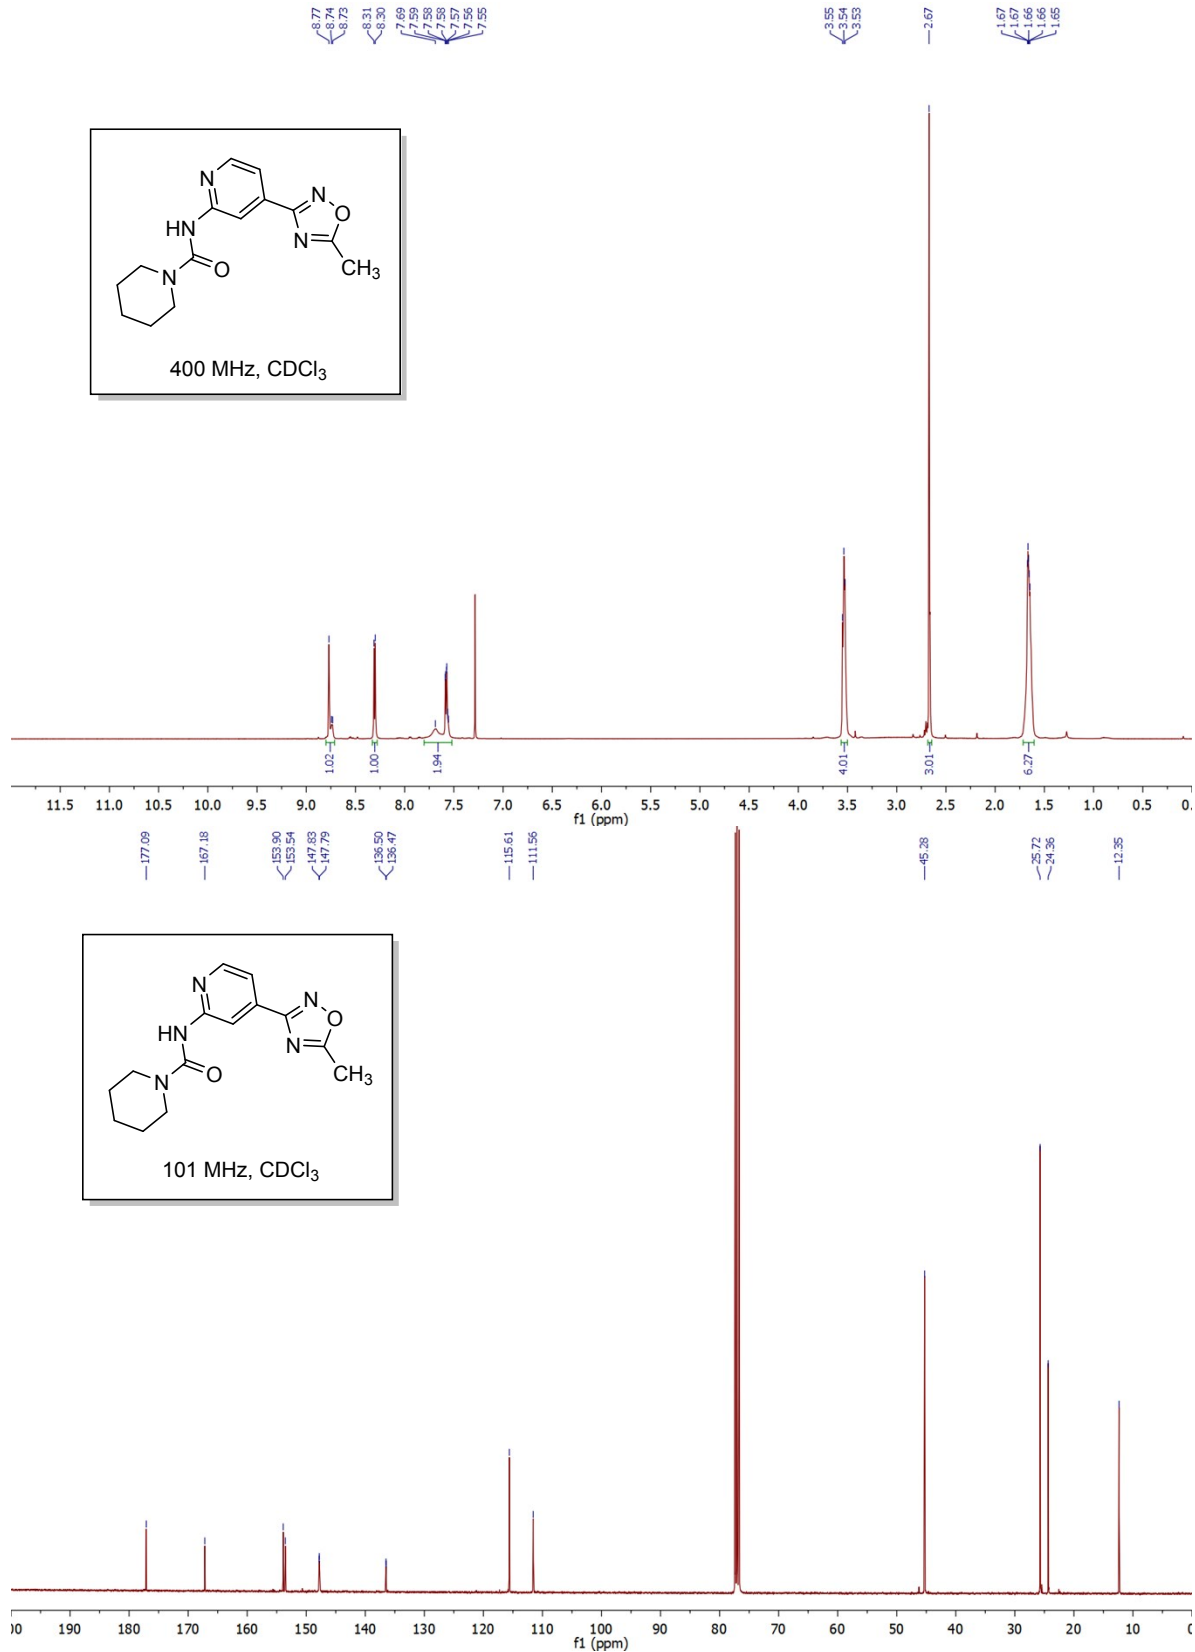

$^1\text{H}$  and  $^{13}\text{C}$  spectra of methyl 2-(piperidine-1-carboxamido)isonicotinate **1j**.

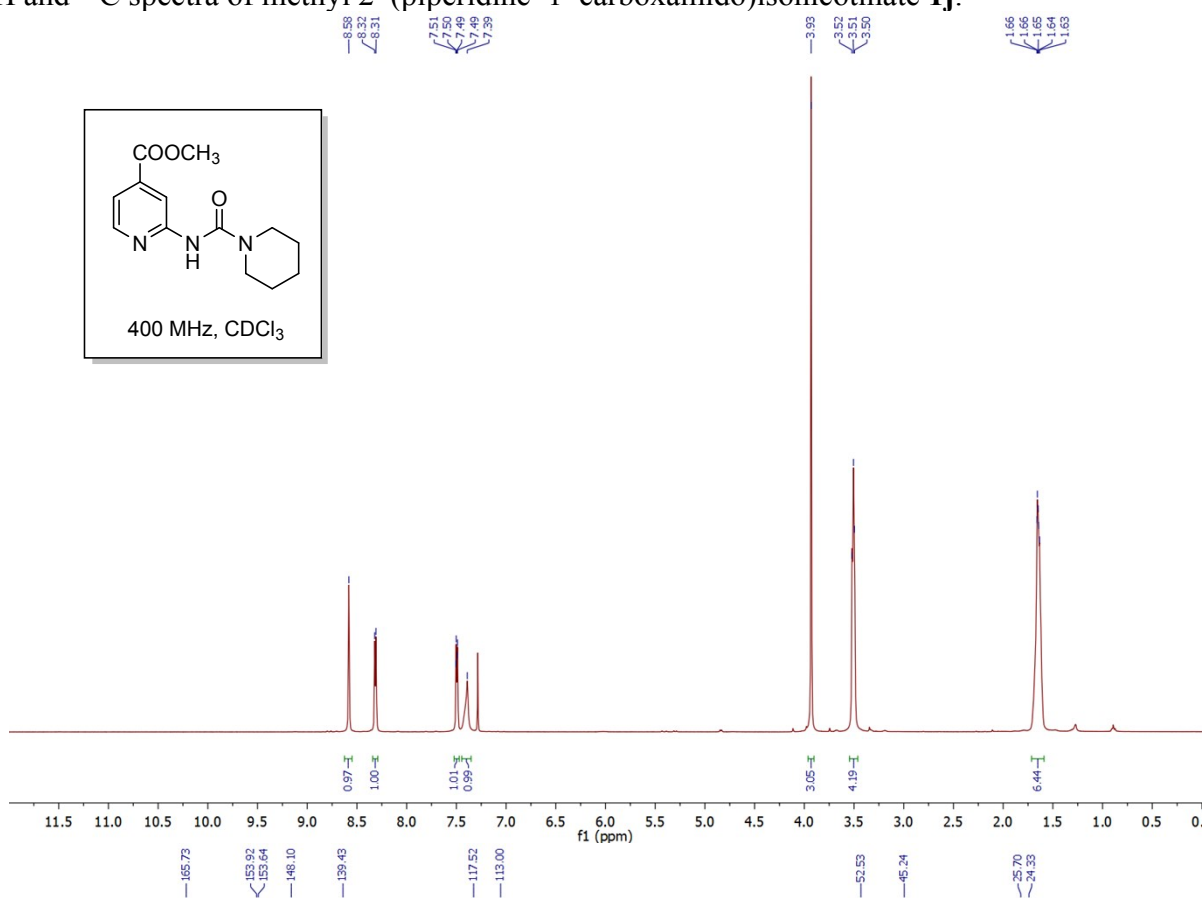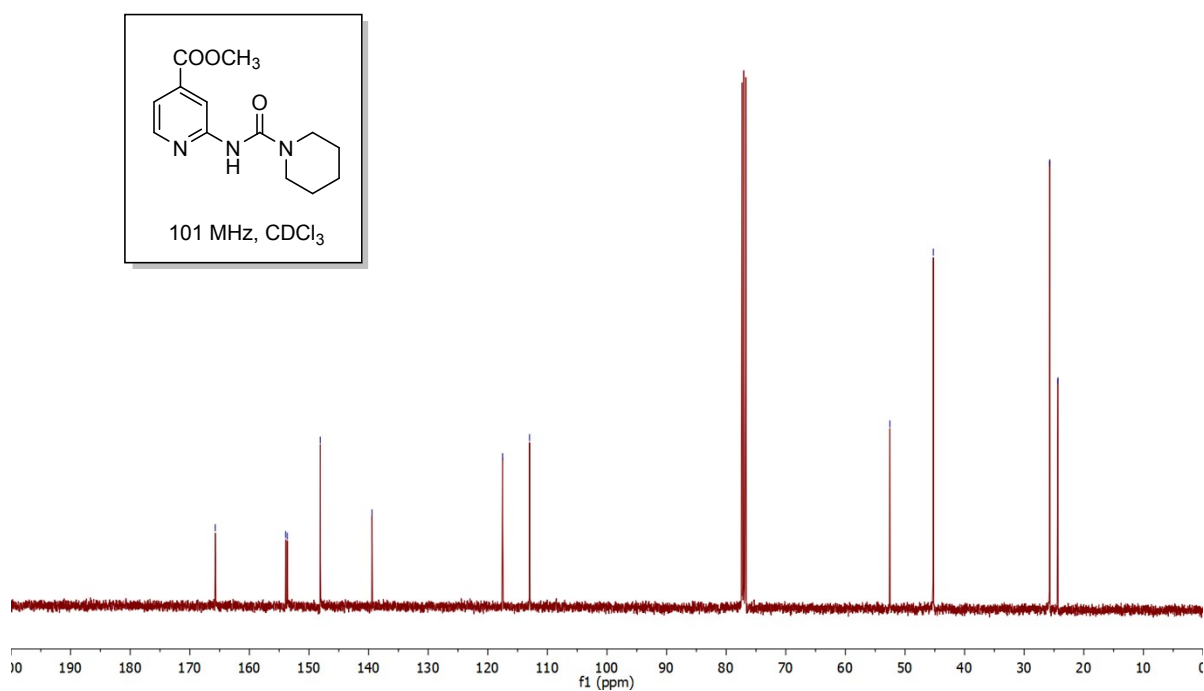

$^1\text{H}$  and  $^{13}\text{C}$  spectra of *N*-(6-methylpyridin-2-yl)piperidine-1-carboxamide **1k**.

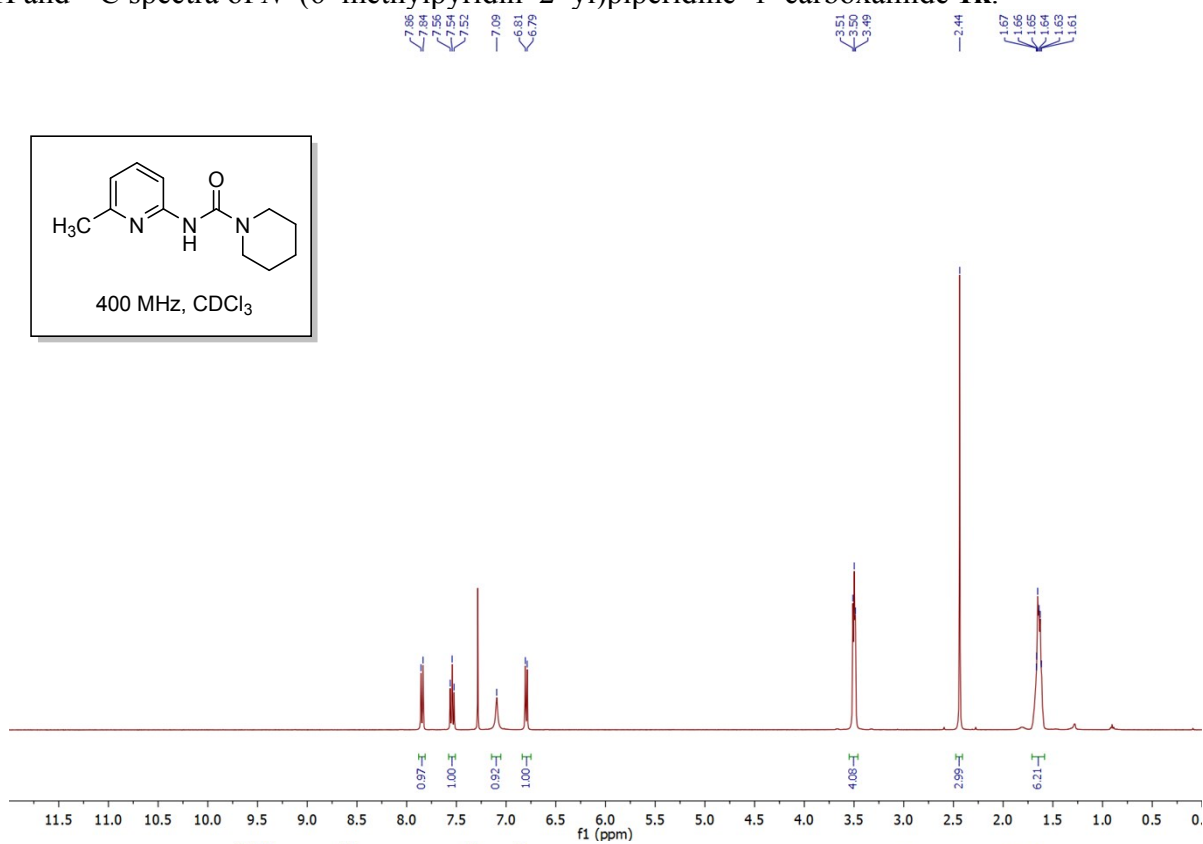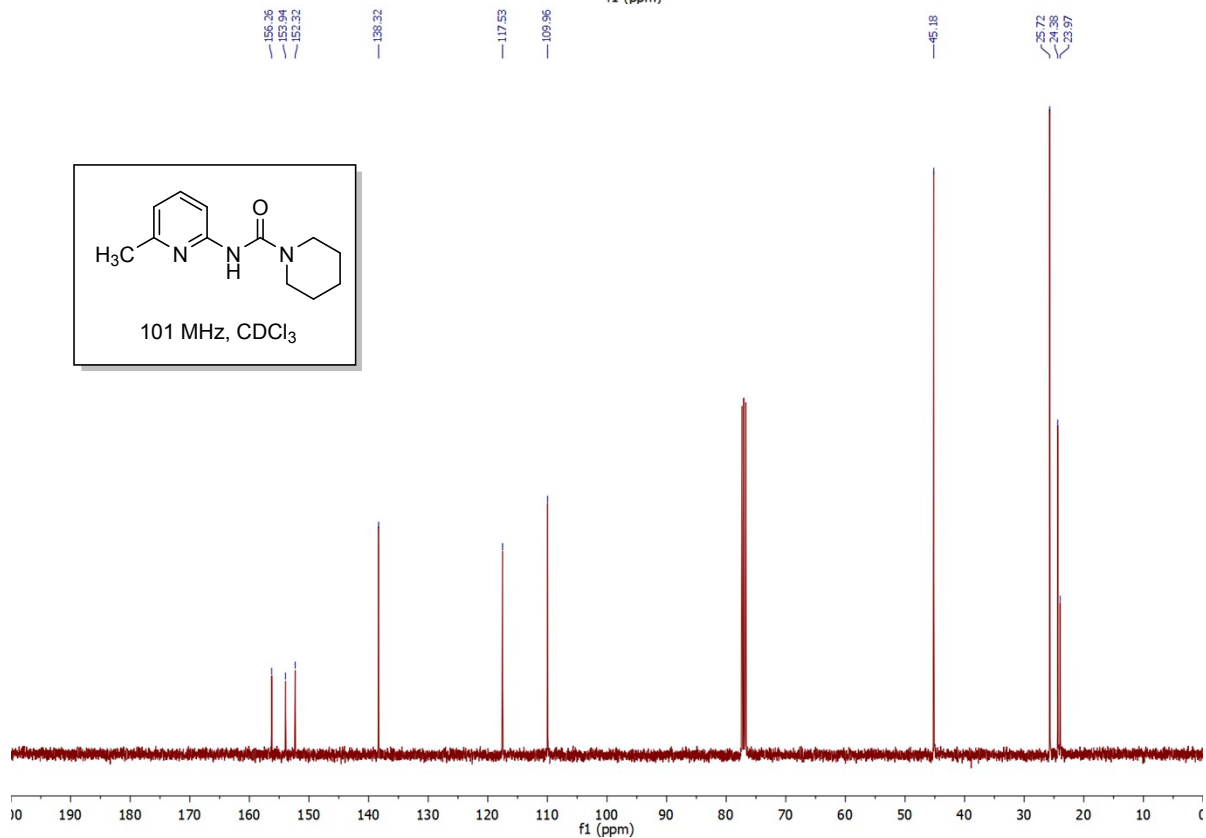

$^1\text{H}$  and  $^{13}\text{C}$  spectra of *N*-(6-cyanopyridin-2-yl)piperidine-1-carboxamide **11**.

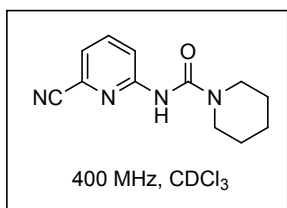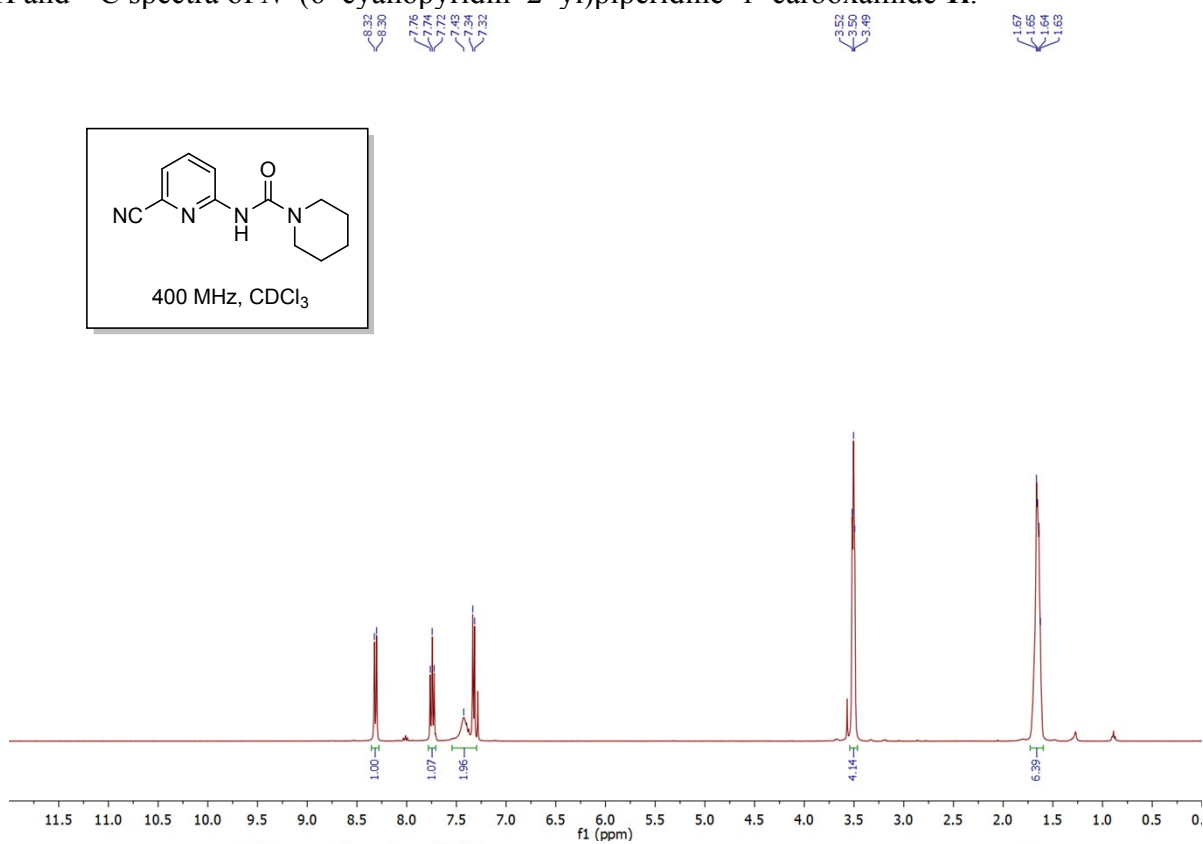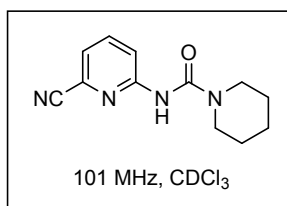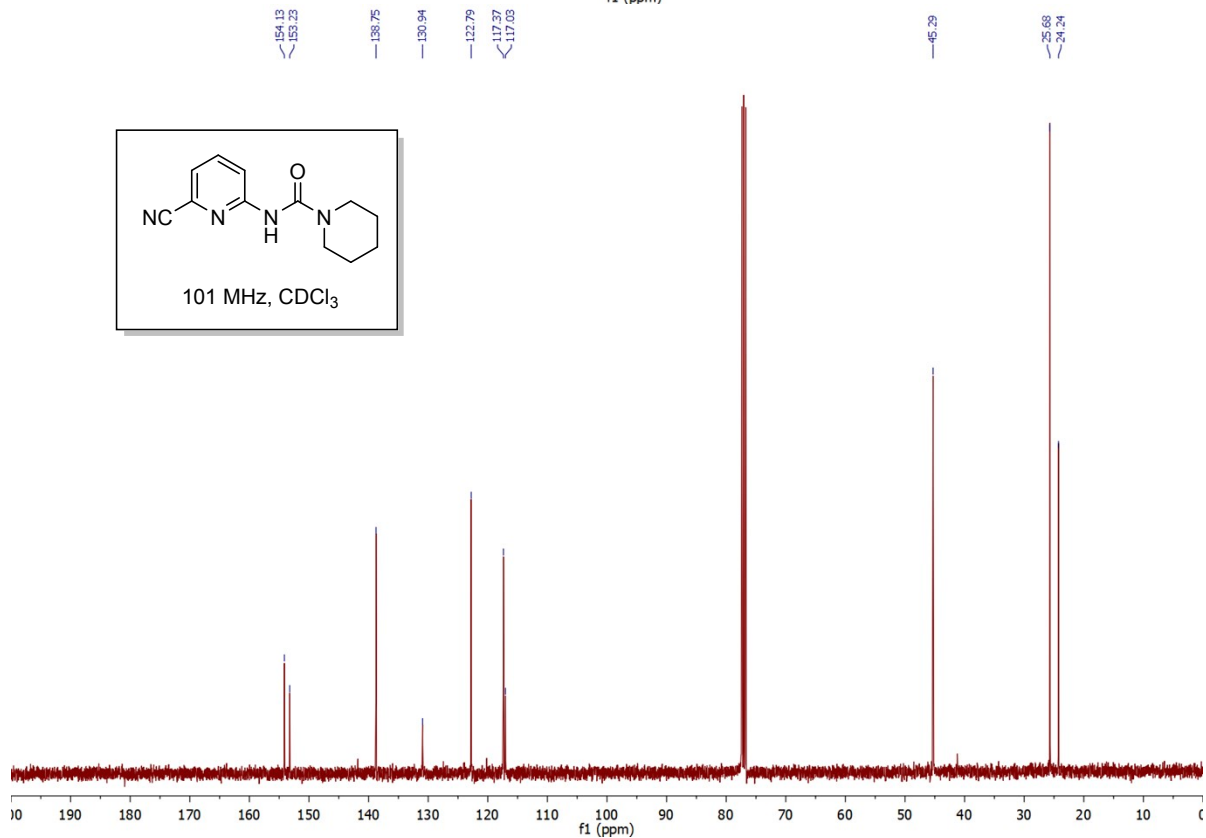



$^1\text{H}$  and  $^{13}\text{C}$  spectra of *N*-(6-chloropyridin-2-yl)piperidine-1-carboxamide **1m**.

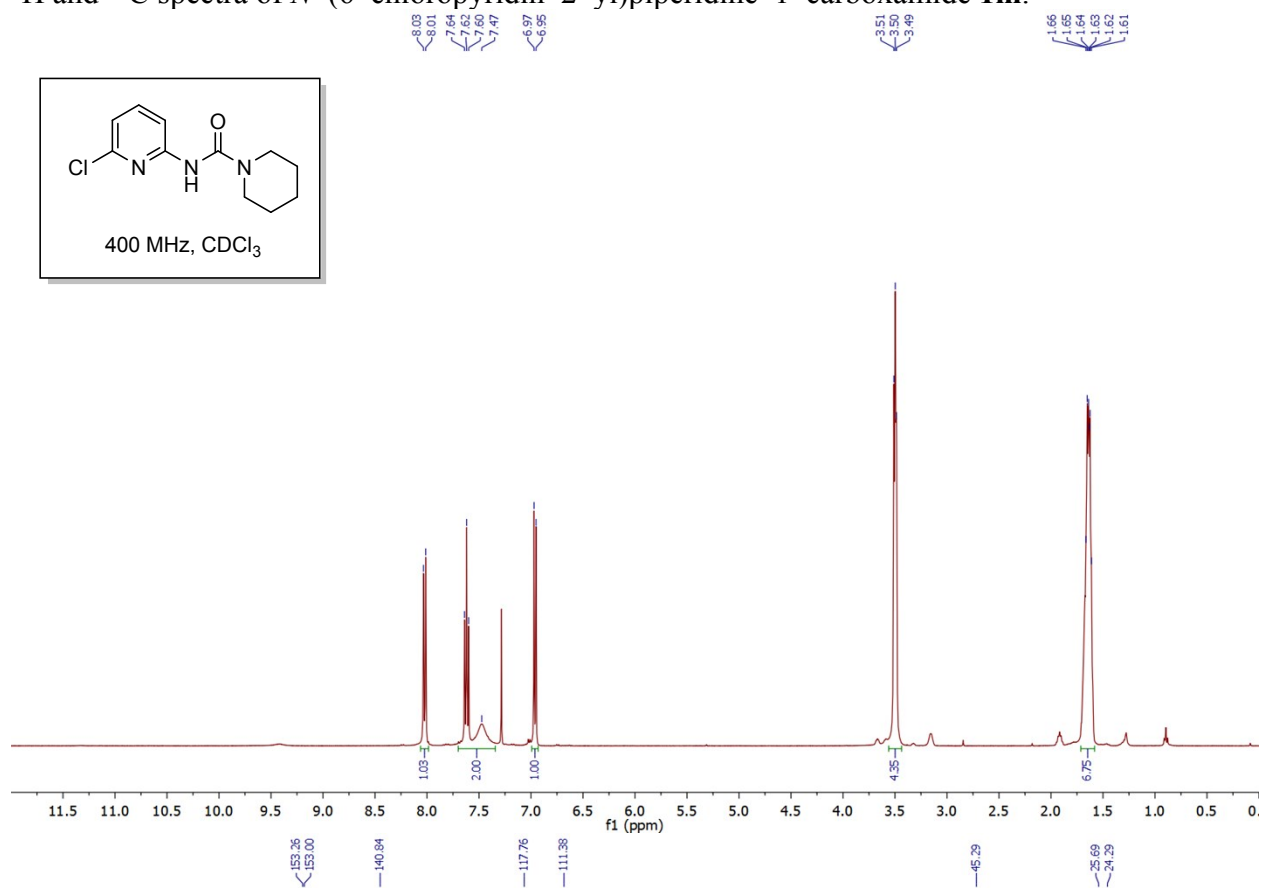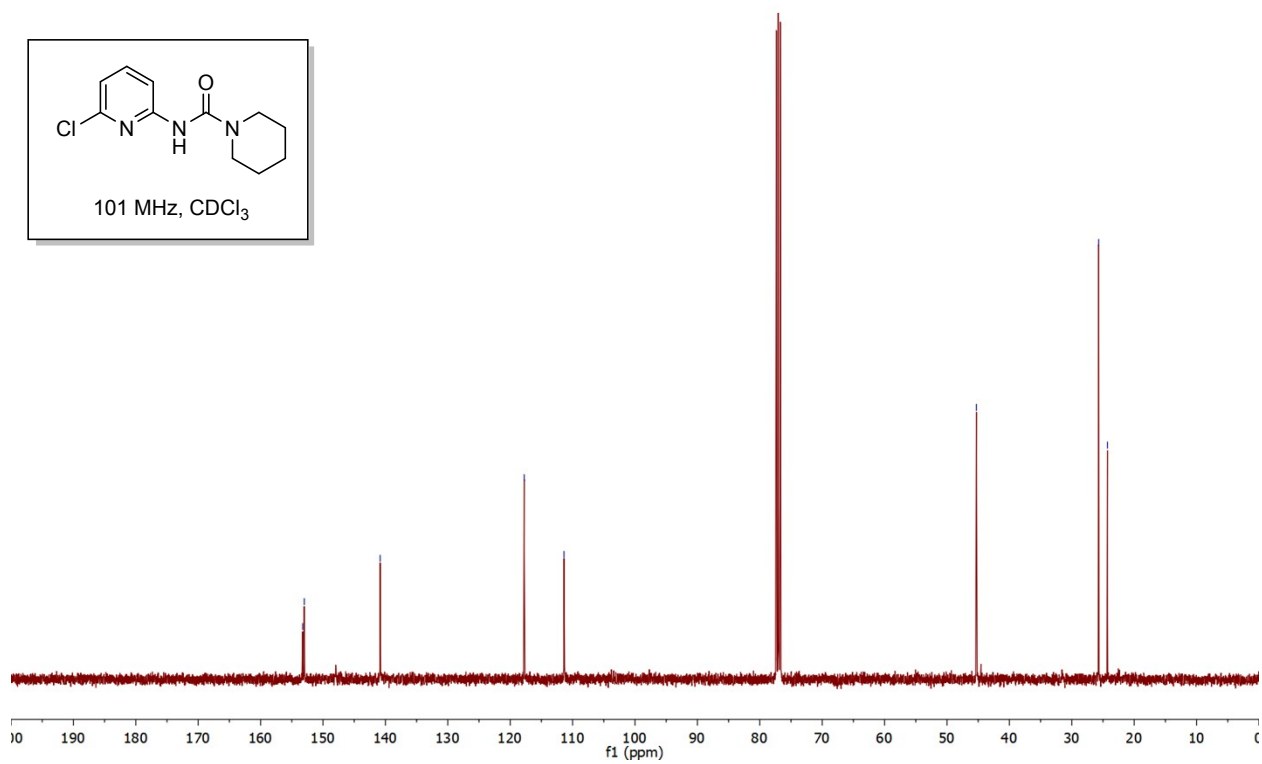

$^1\text{H}$  and  $^{13}\text{C}$  spectra of *N*-(6-phenylpyridin-2-yl)piperidine-1-carboxamide **1n**.

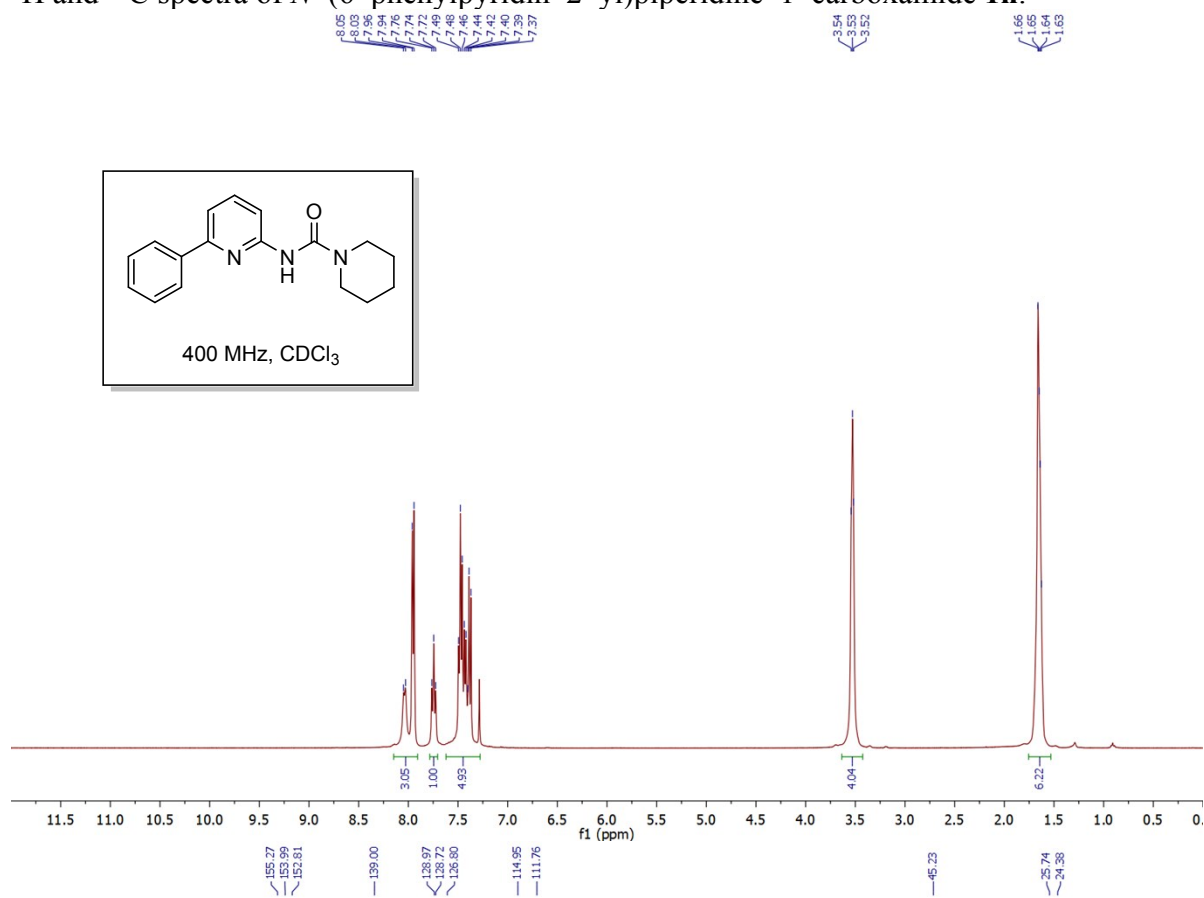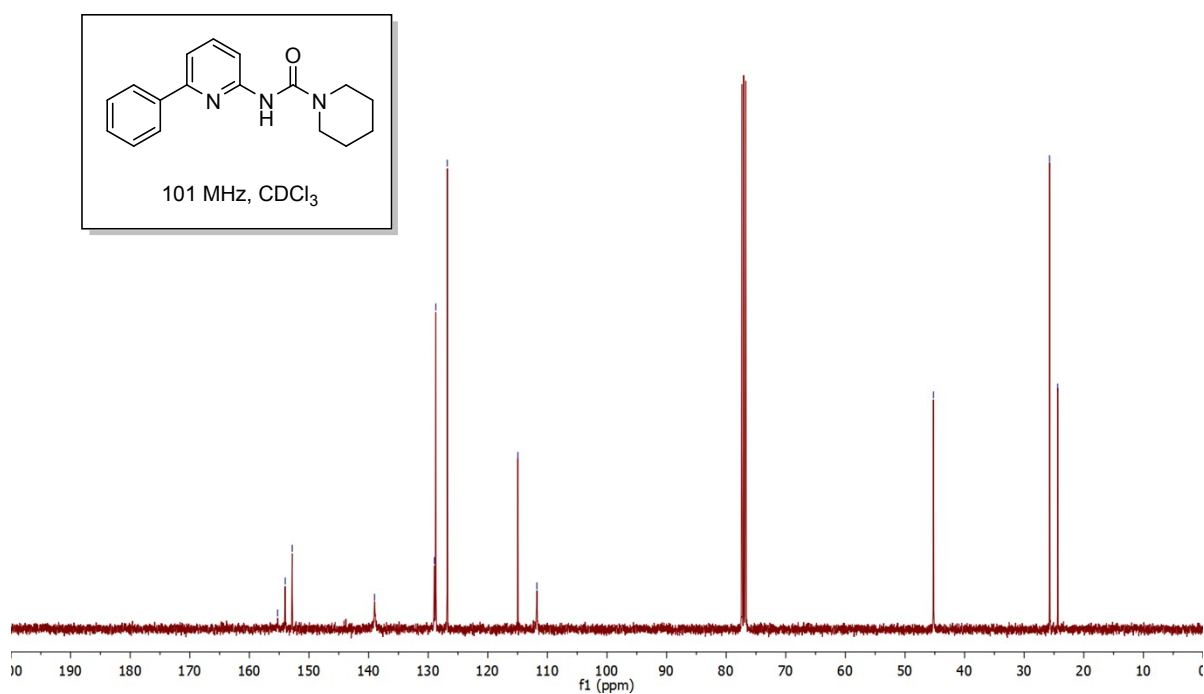

$^1\text{H}$  and  $^{13}\text{C}$  *N*-(3,5-dimethylpyridin-2-yl)piperidine-1-carboxamide **10**.

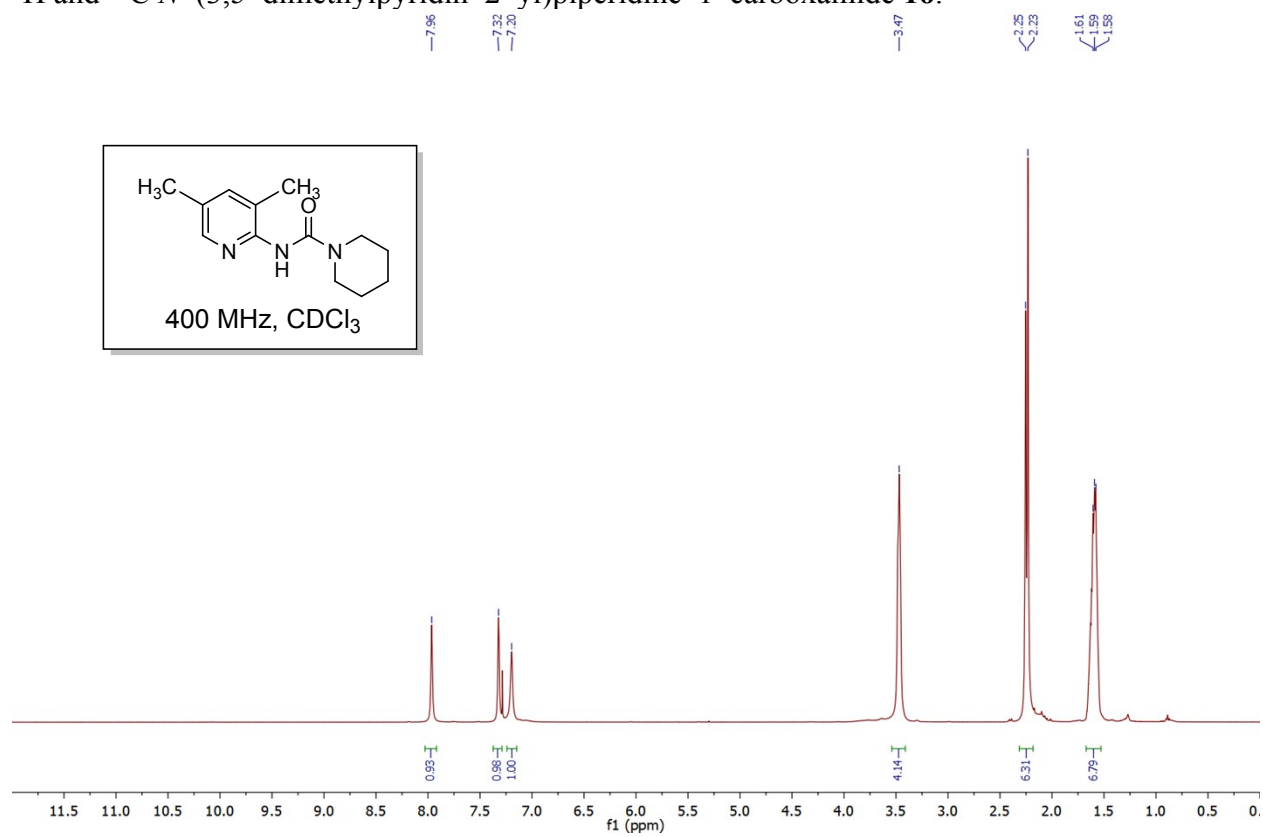

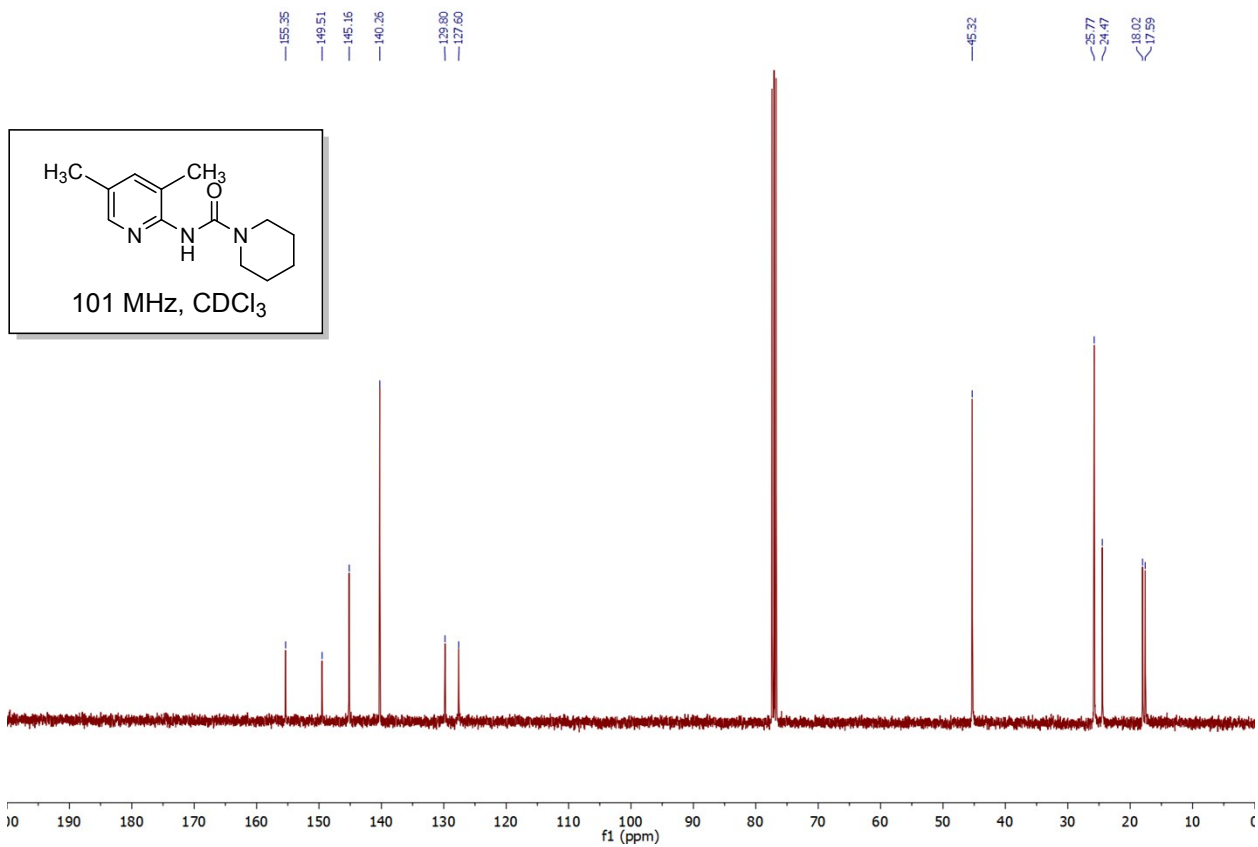

$^1\text{H}$  and  $^{13}\text{C}$  spectra of *N*-(quinolin-2-yl)piperidine-1-carboxamide **1p**.

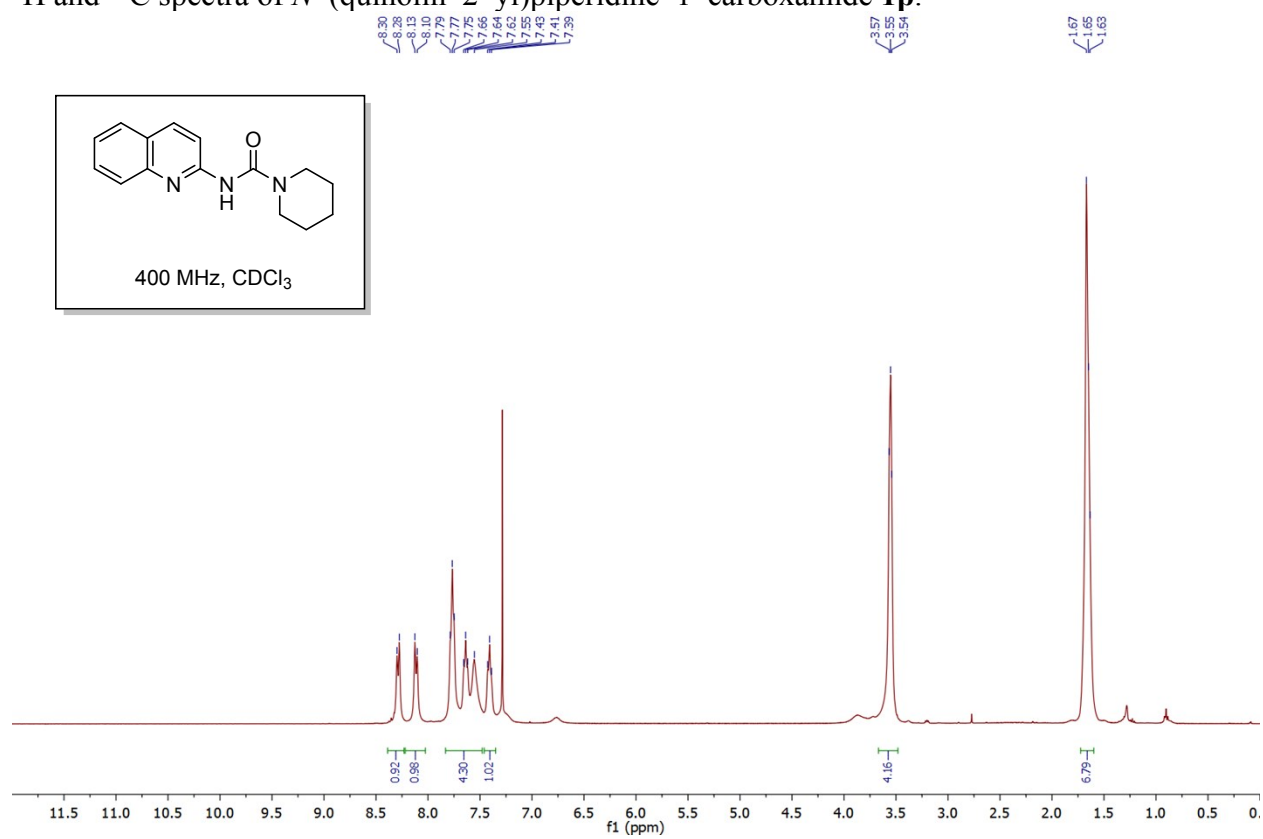

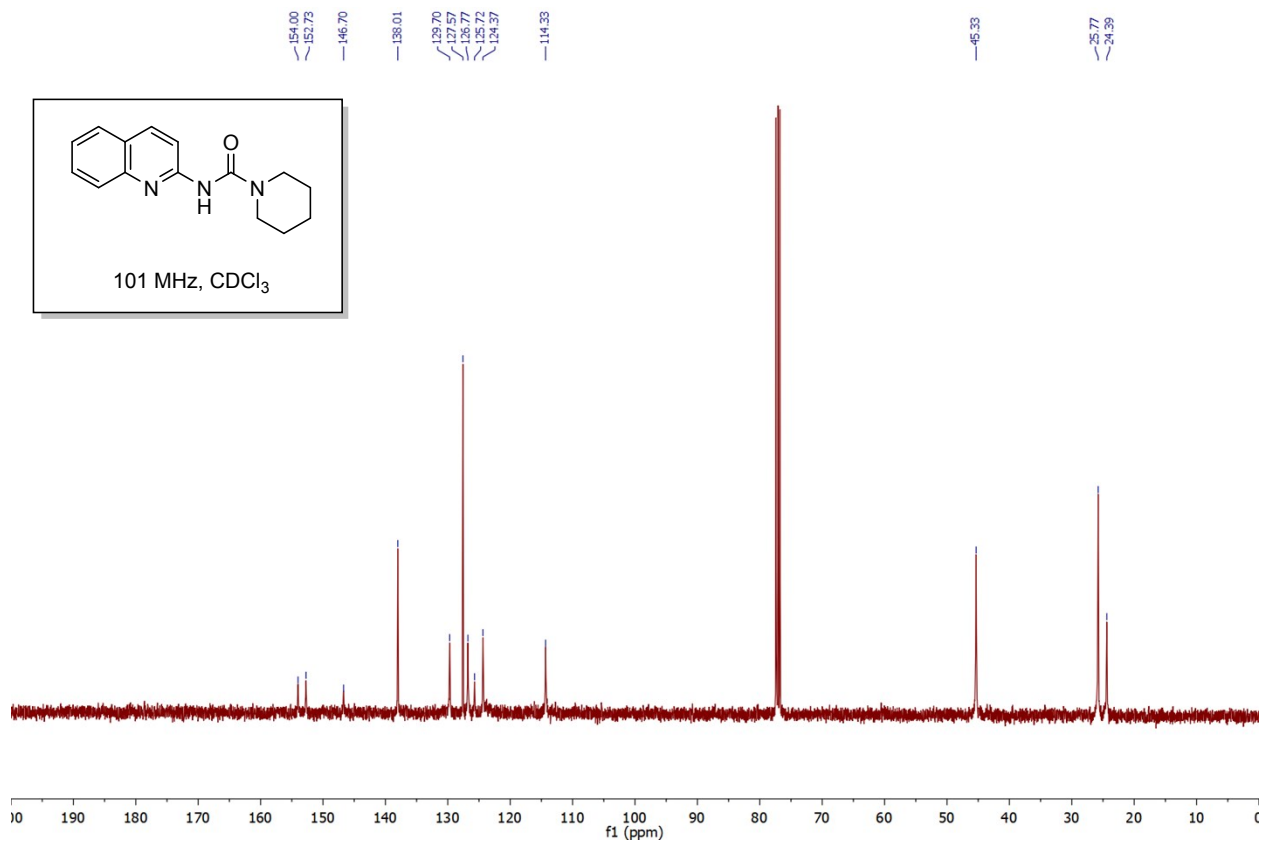

$^1\text{H}$  and  $^{13}\text{C}$  spectra of *N*-(4-methoxyquinolin-2-yl)piperidine-1-carboxamide **1q**.

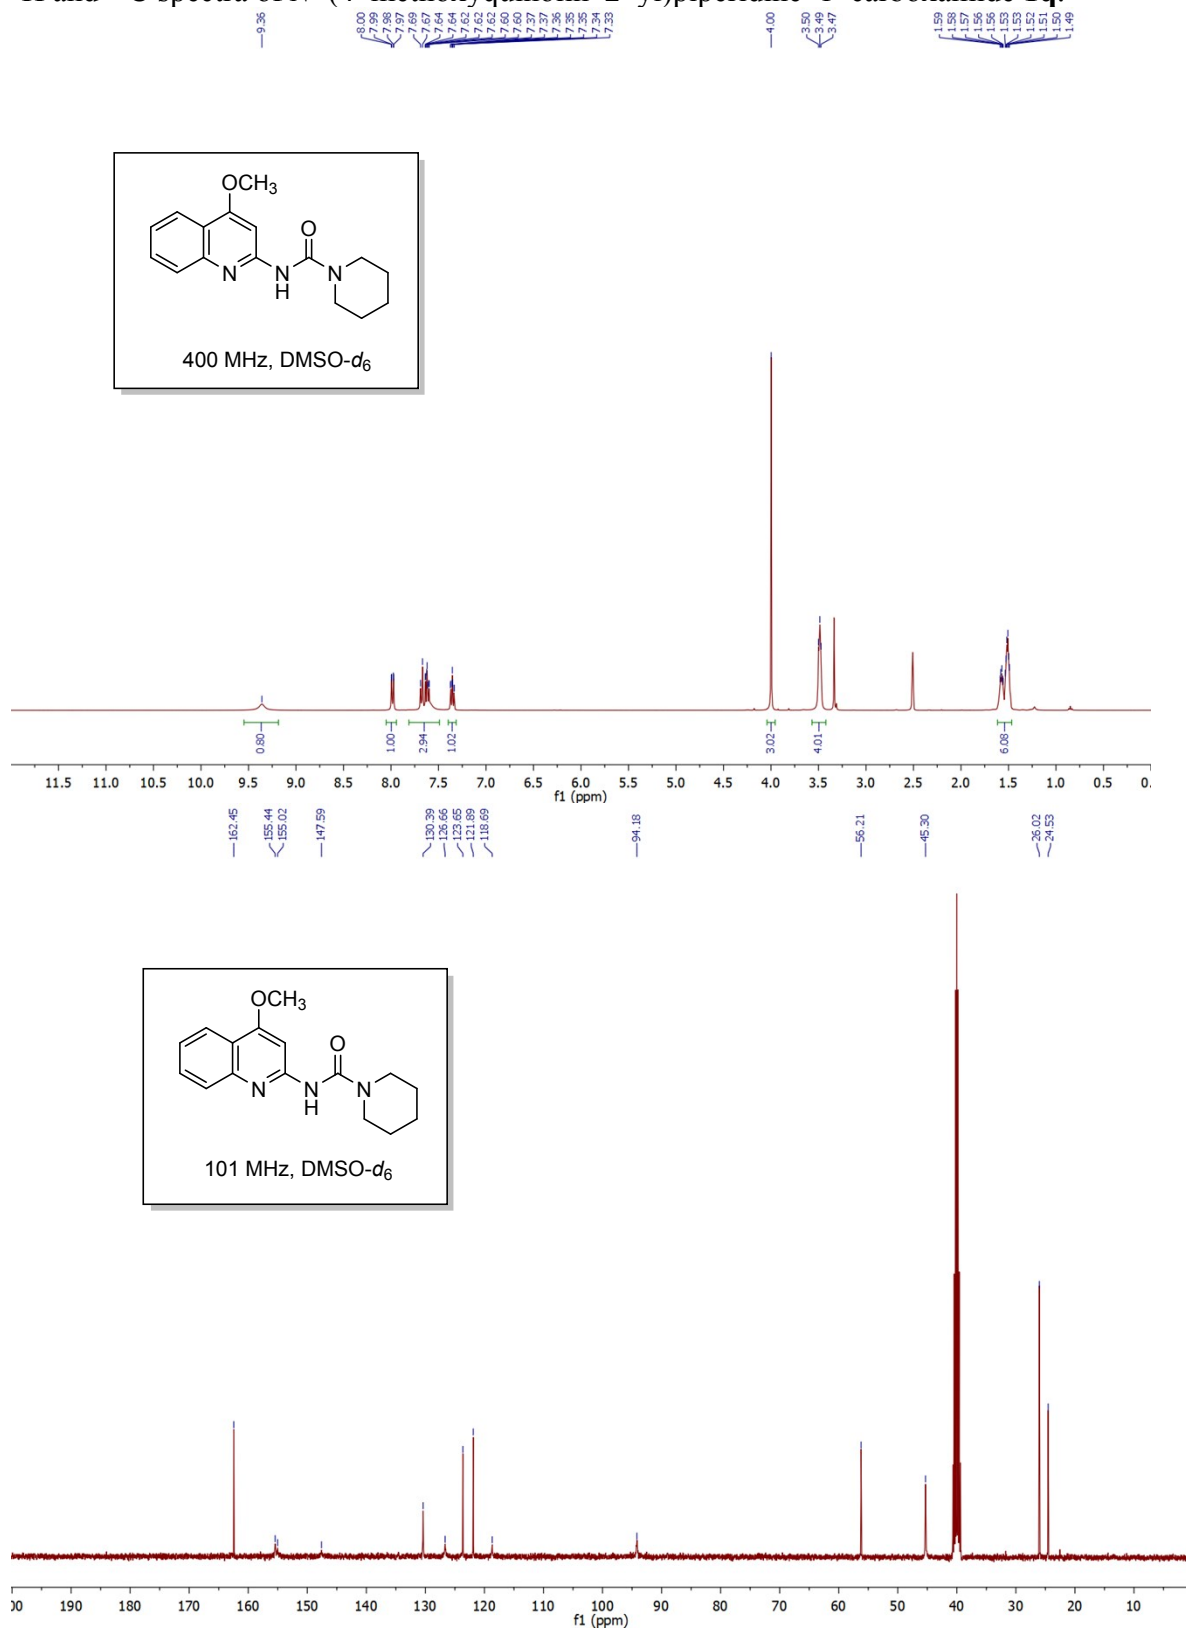

$^1\text{H}$  and  $^{13}\text{C}$  spectra of *N*-(4-nitroquinolin-2-yl)piperidine-1-carboxamide **1r**.

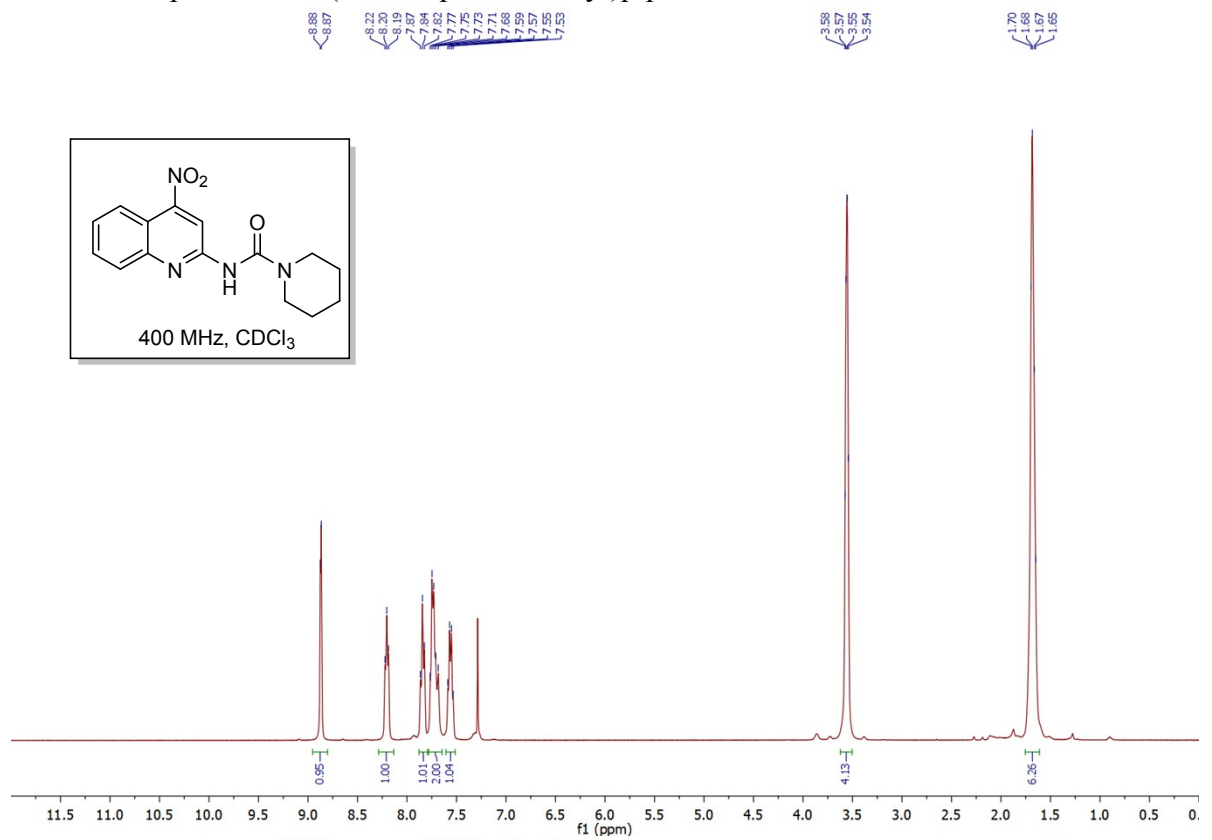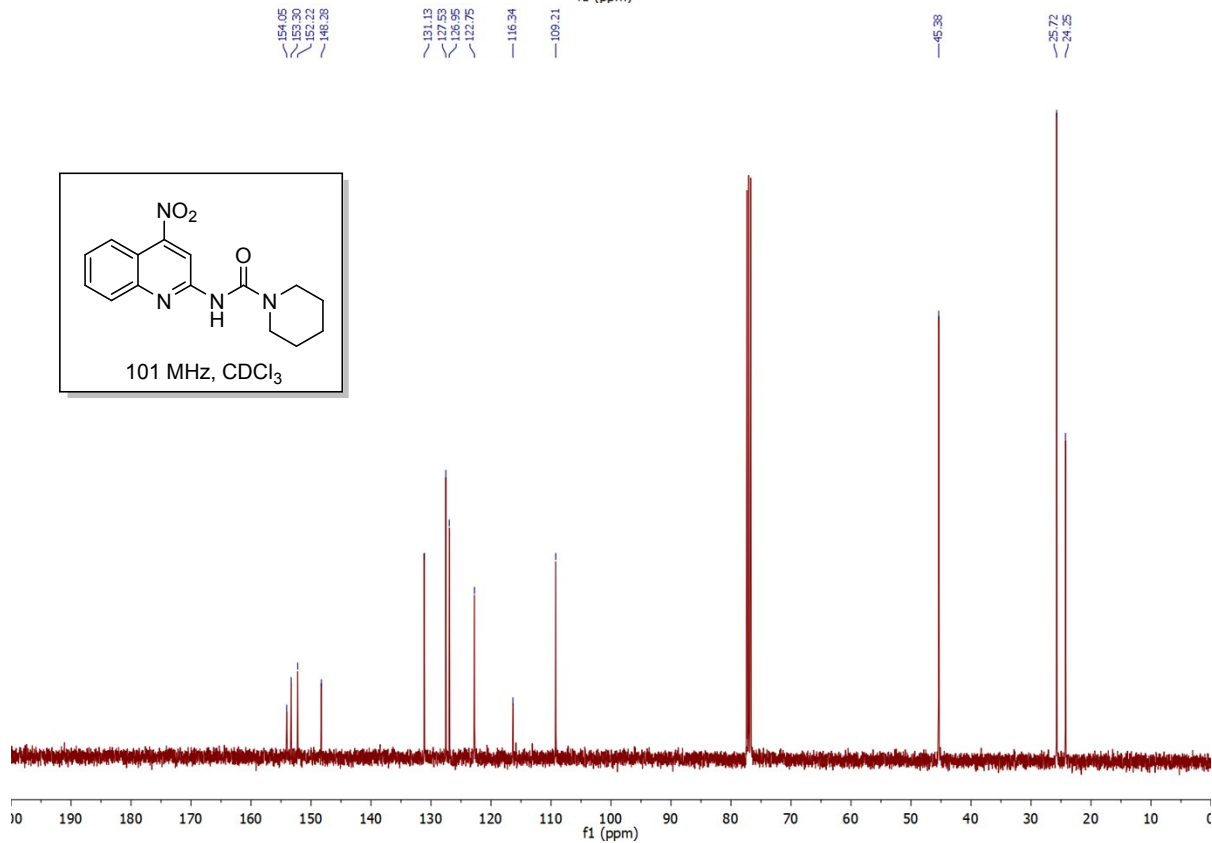



$^1\text{H}$  and  $^{13}\text{C}$  spectra of *N*-(isoquinolin-1-yl)piperidine-1-carboxamide **1s**.

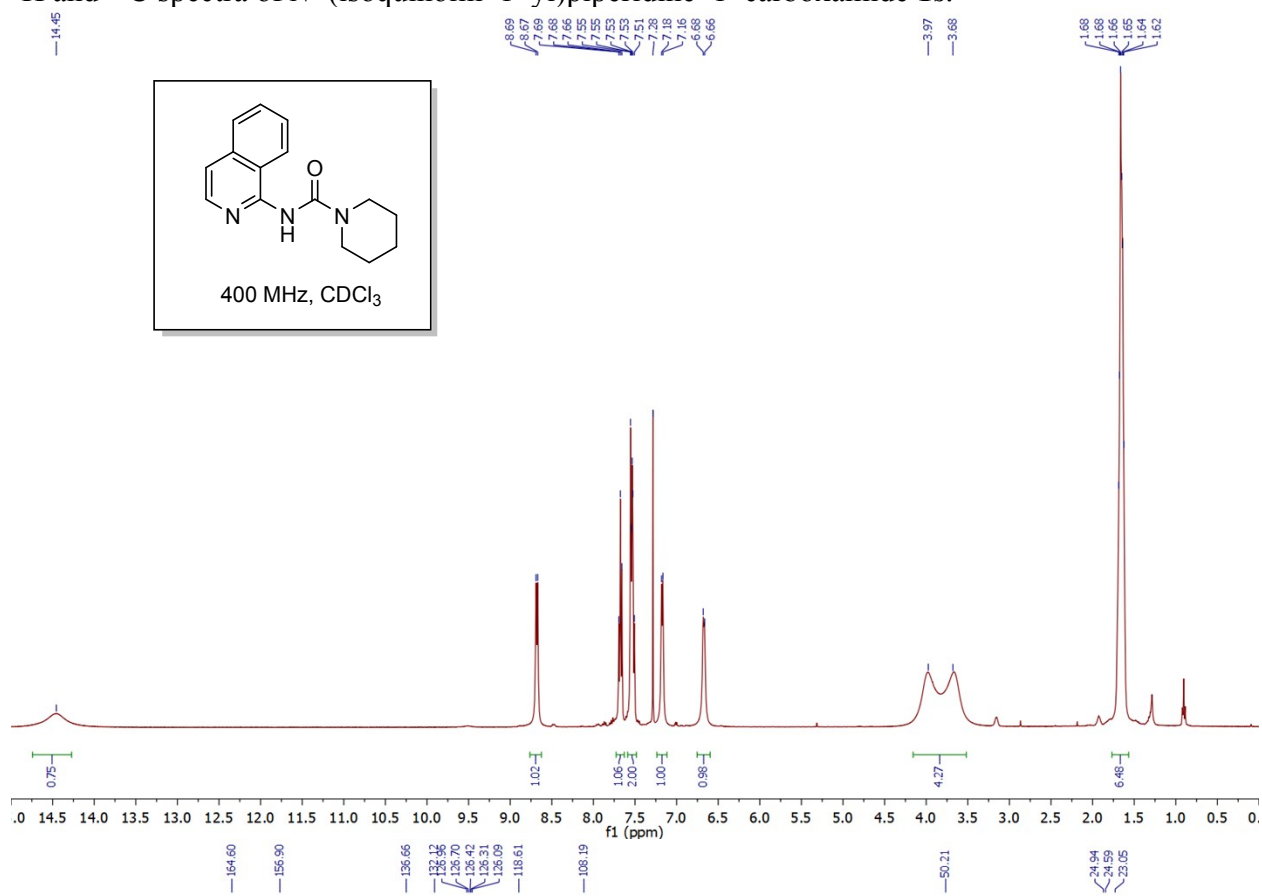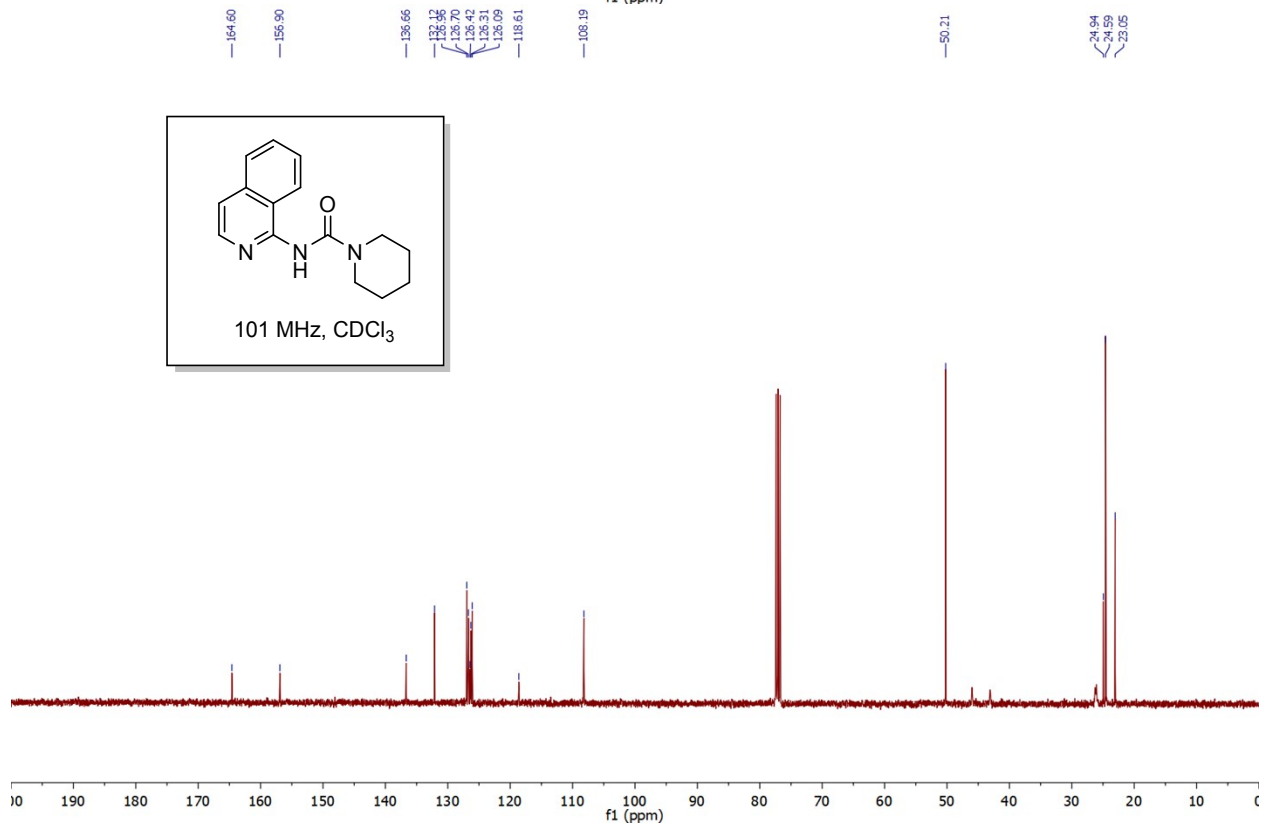

$^1\text{H}$  and  $^{13}\text{C}$  spectra of *N*-(benzo[*h*]quinolin-2-yl)piperidine-1-carboxamide **1t**.

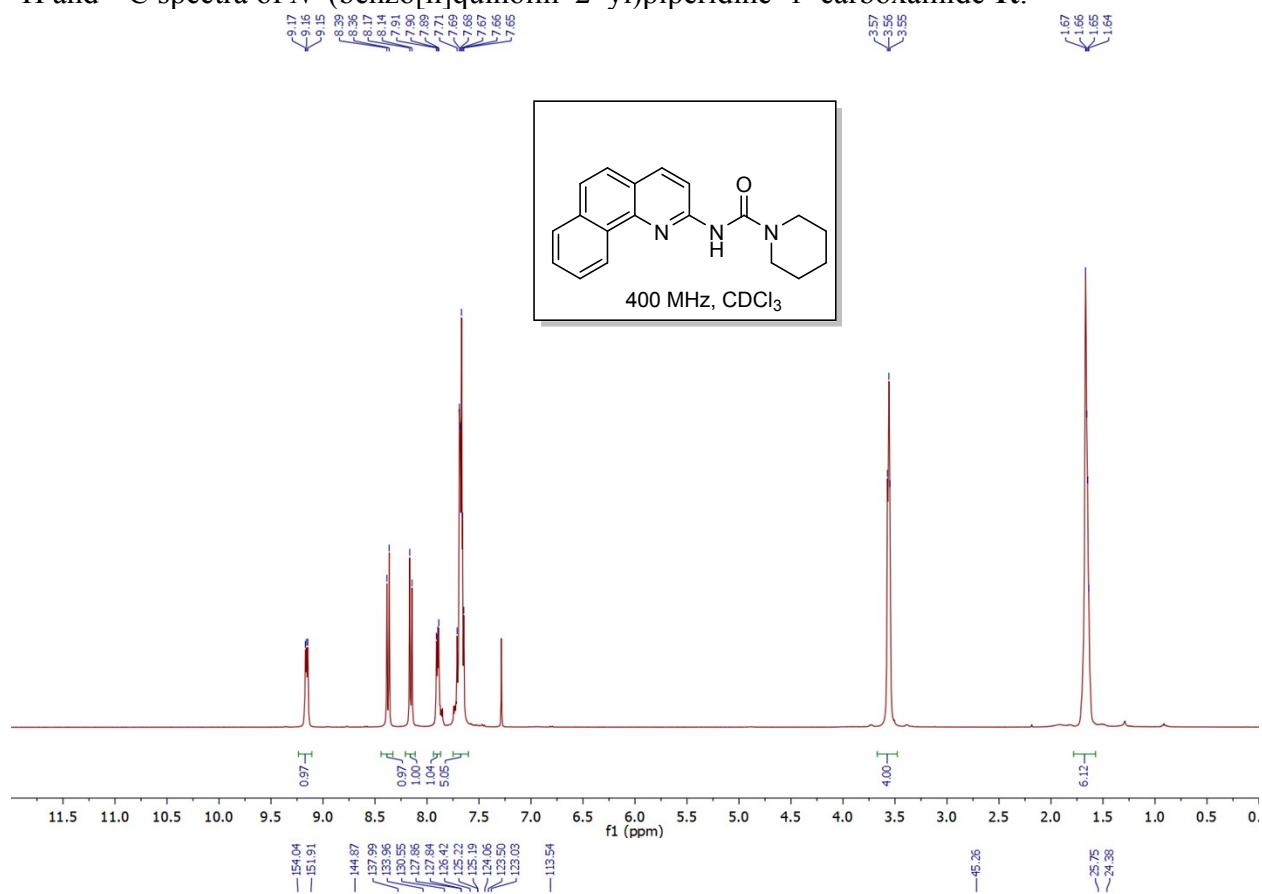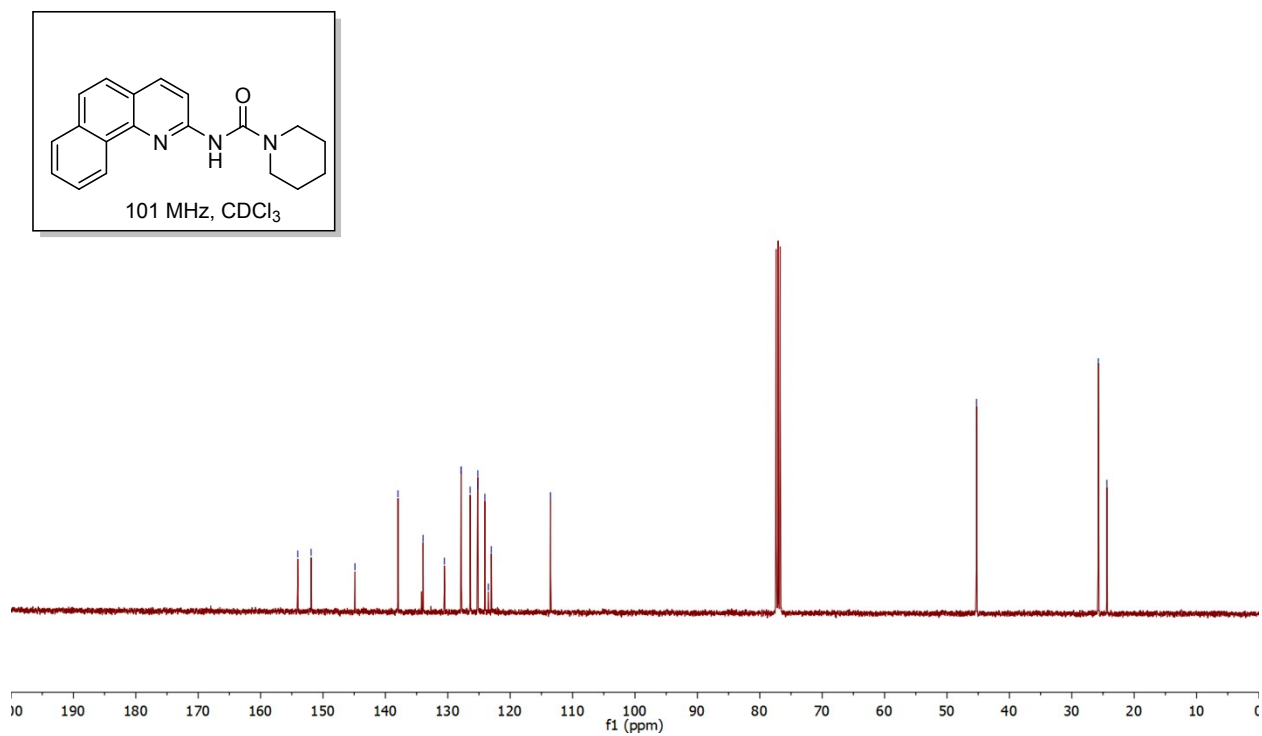

$^1\text{H}$  and  $^{13}\text{C}$  spectra of methyl (4-methylpyridin-2-yl)carbamate **2a**.

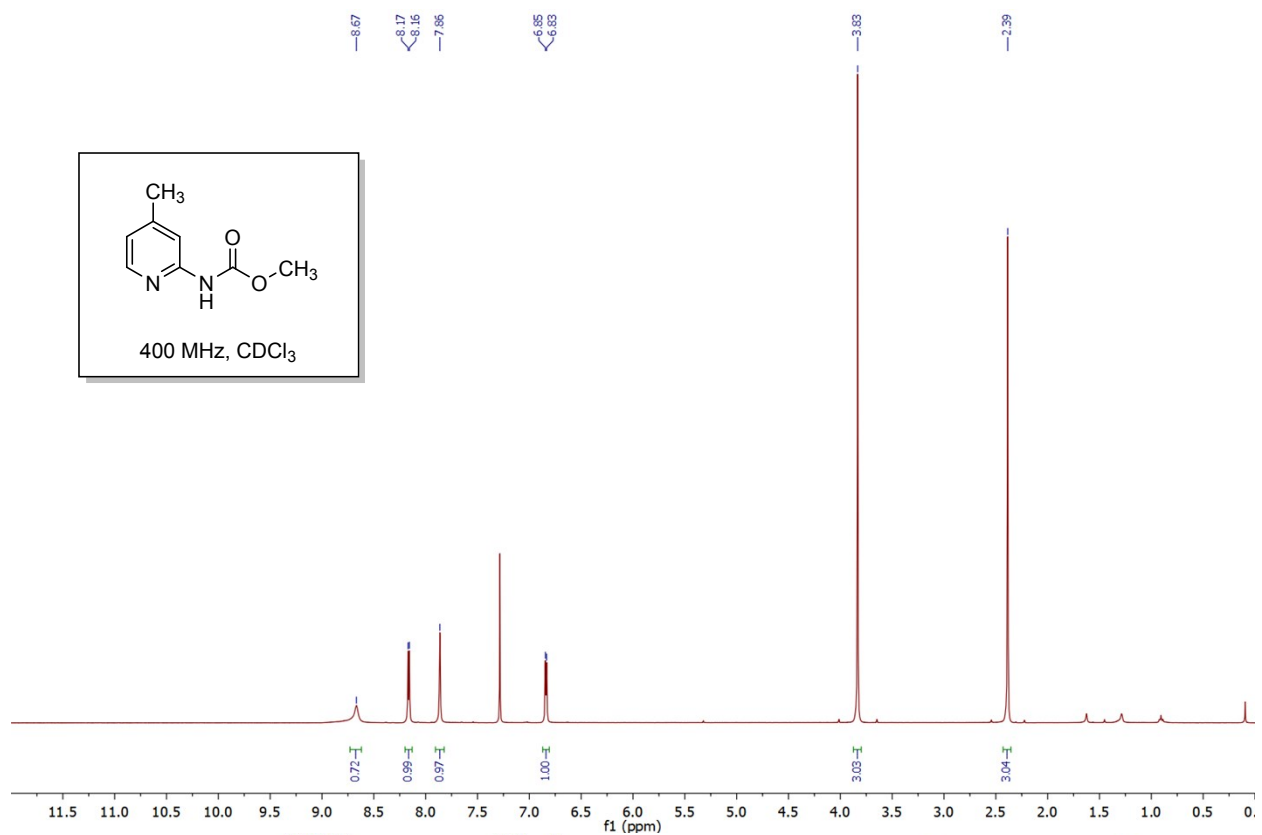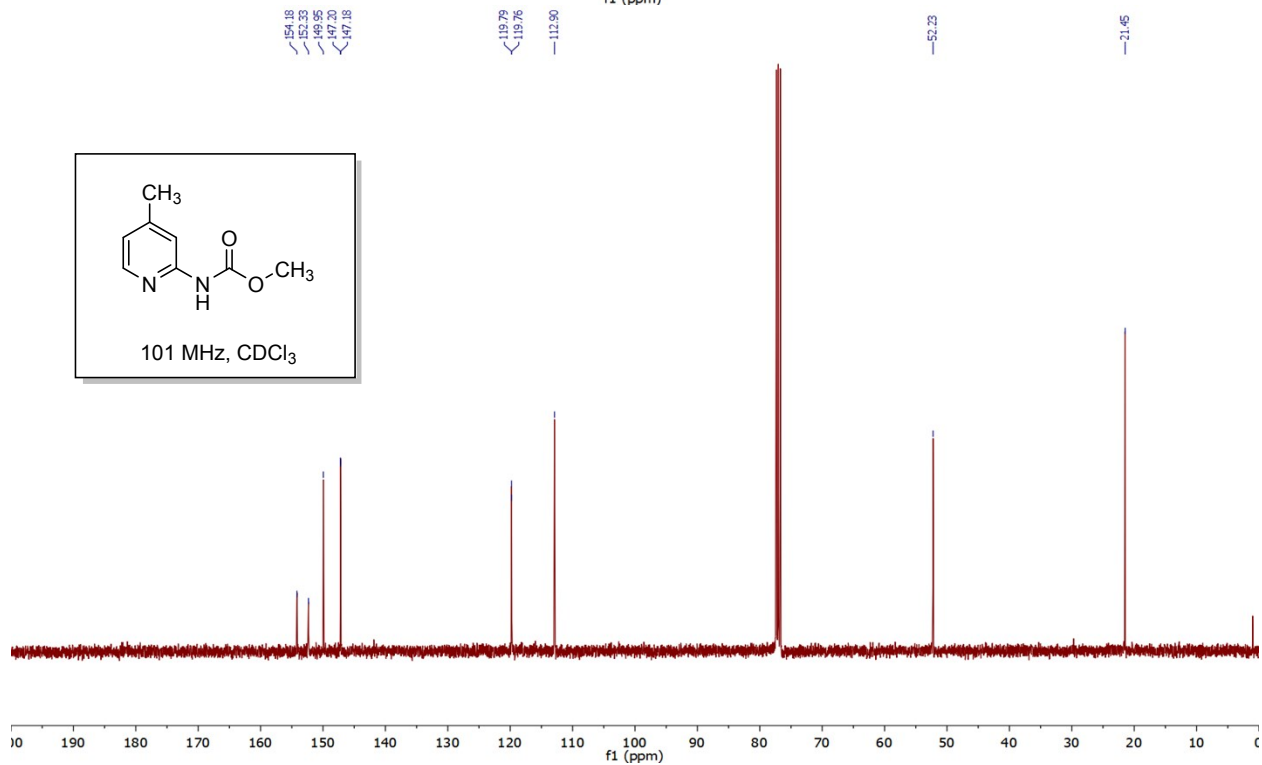

$^1\text{H}$  and  $^{13}\text{C}$  spectra of ethyl (4-methylpyridin-2-yl)carbamate **2b**.

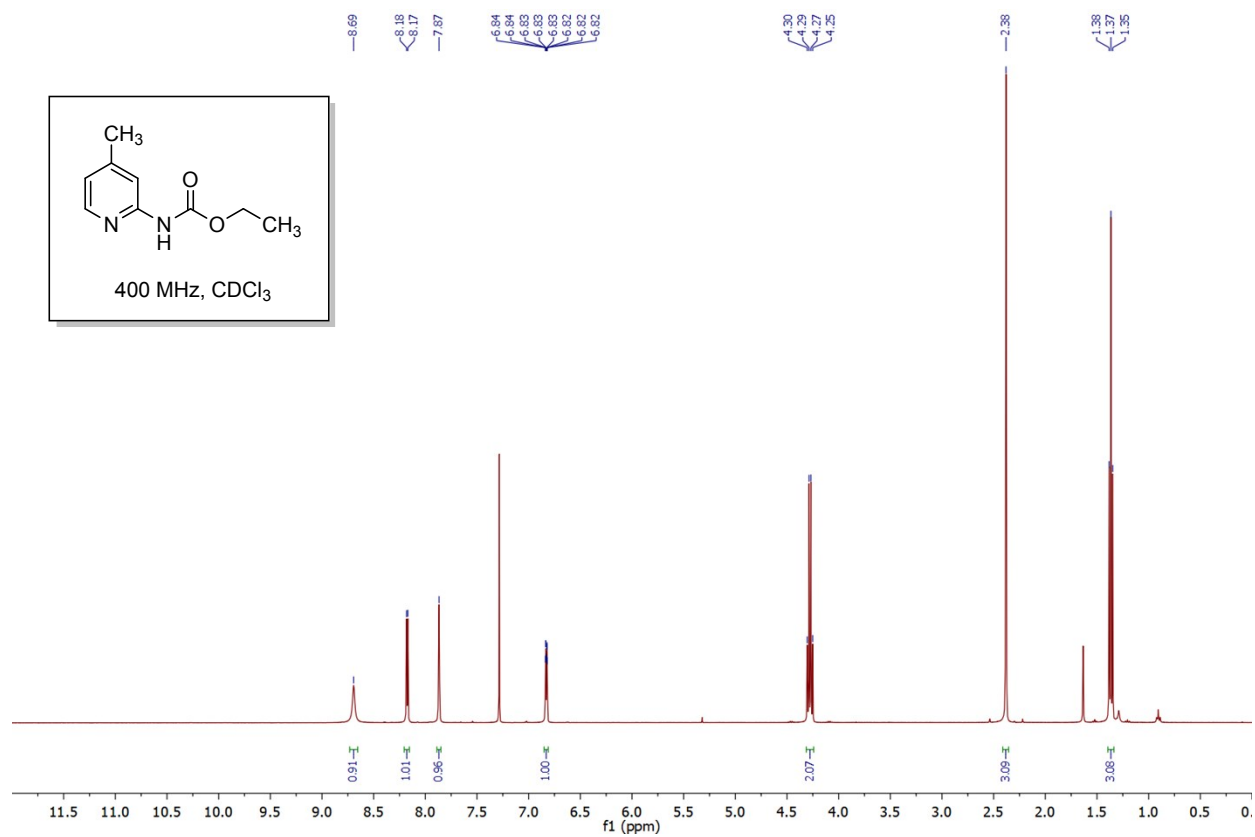

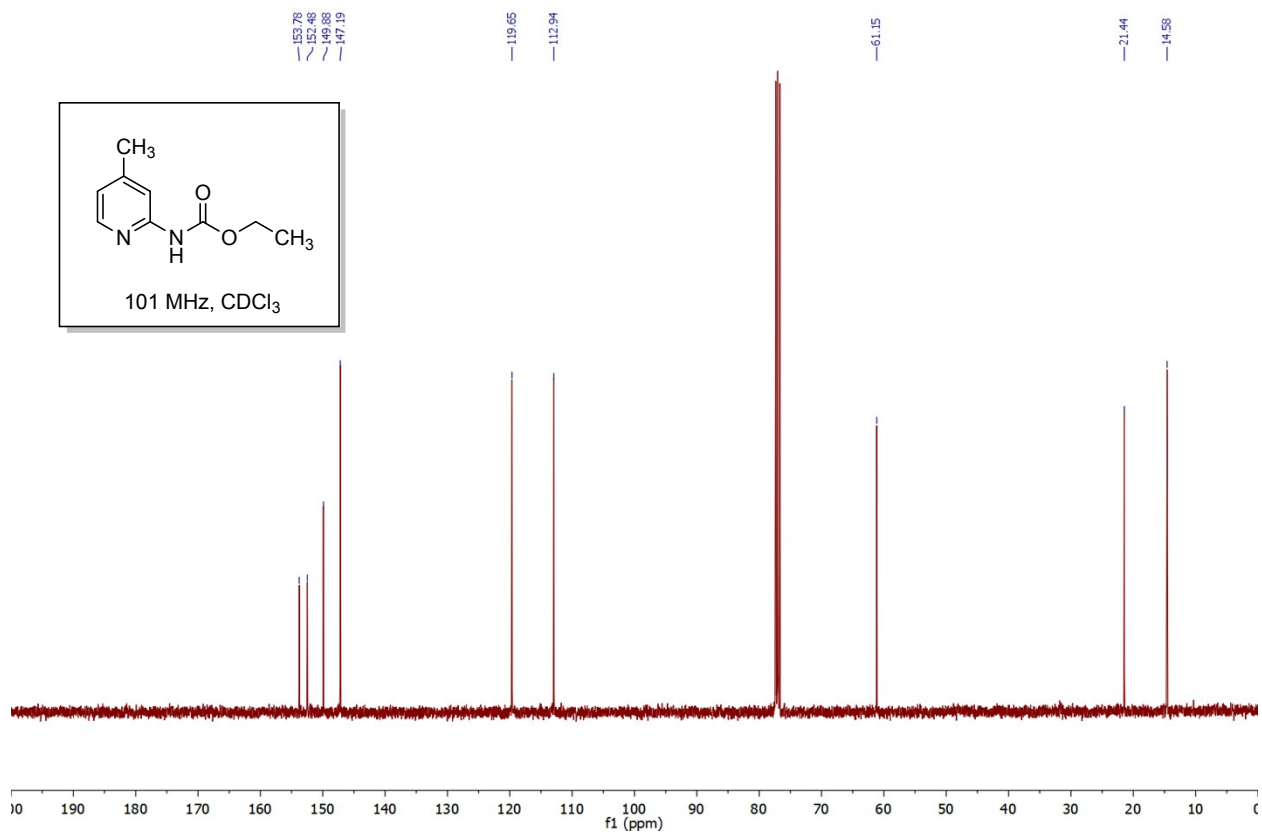

$^1\text{H}$  and  $^{13}\text{C}$  spectra of propyl (4-methylpyridin-2-yl)carbamate **2c**.

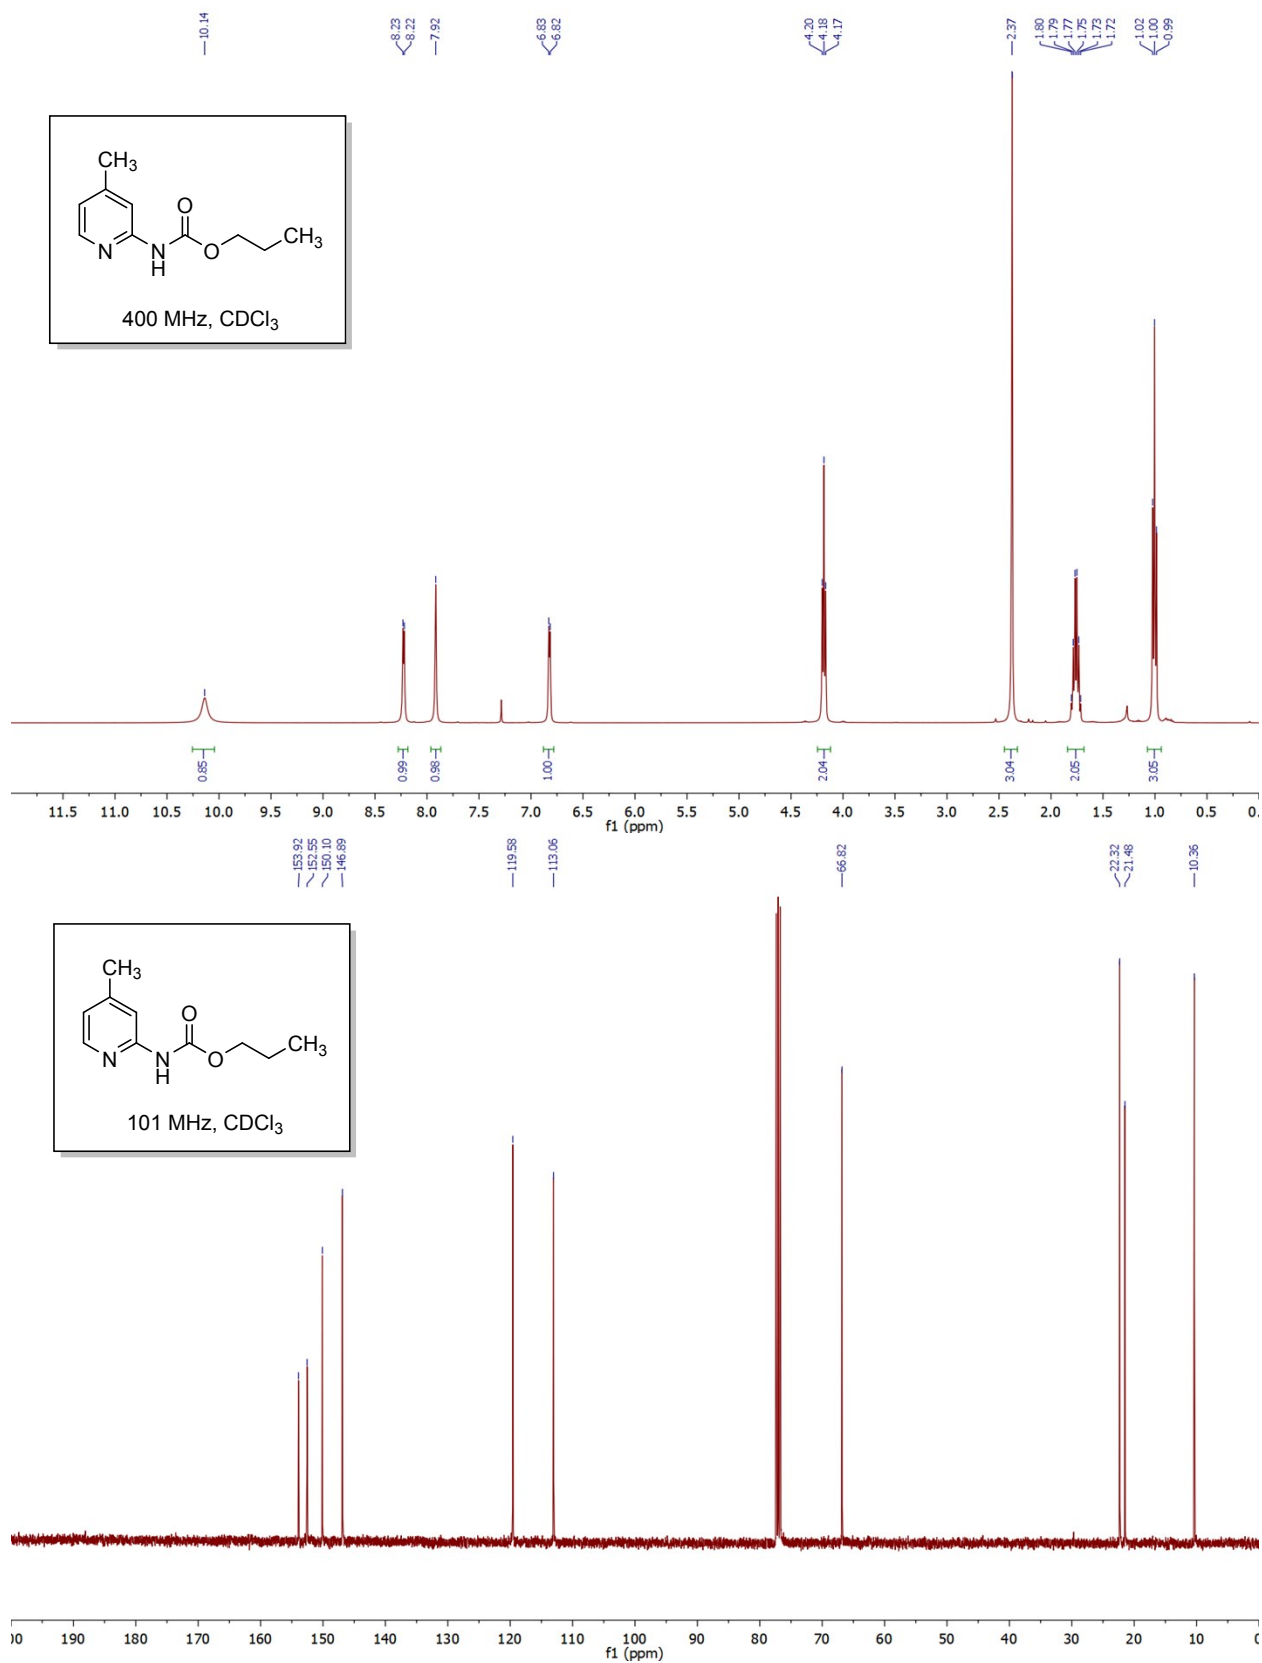

$^1\text{H}$  and  $^{13}\text{C}$  spectra of butyl (4-methylpyridin-2-yl)carbamate **2d**.

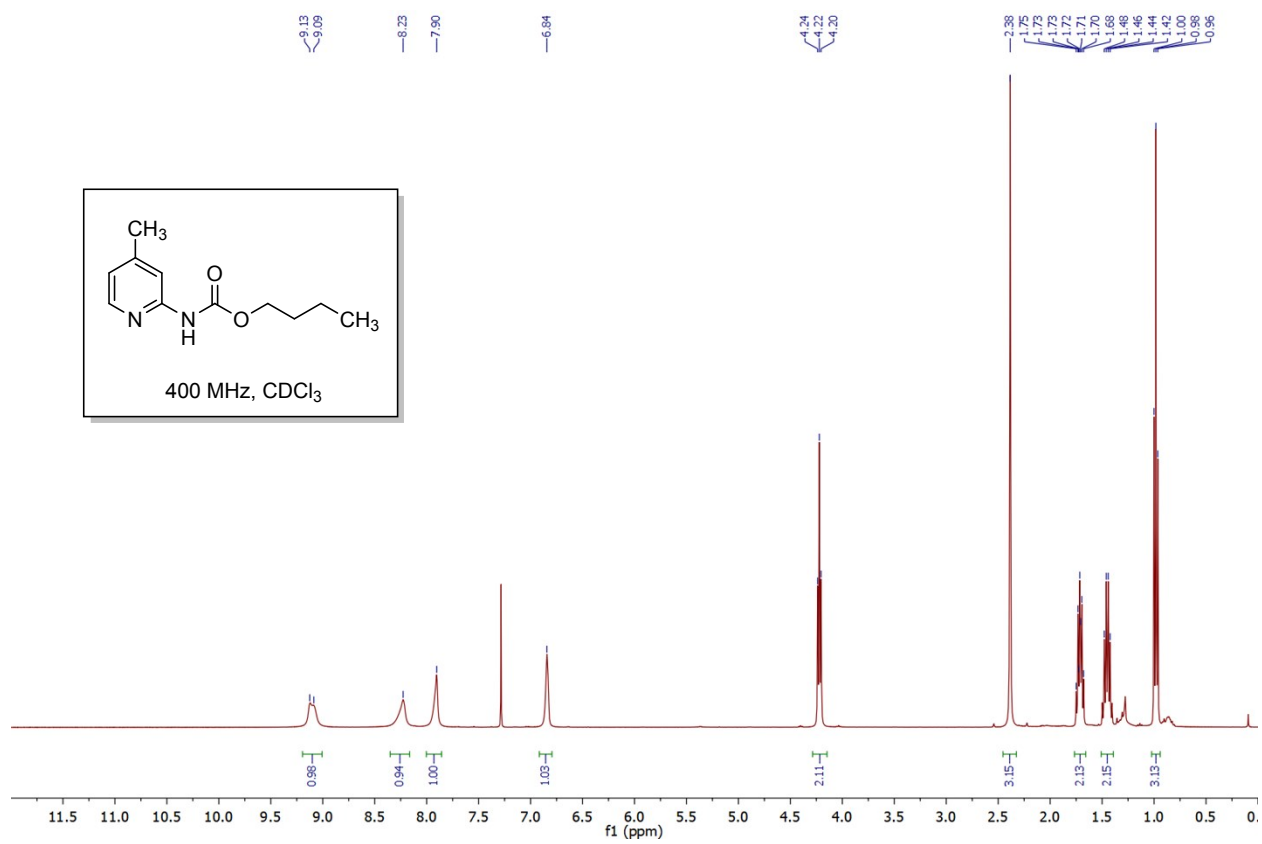

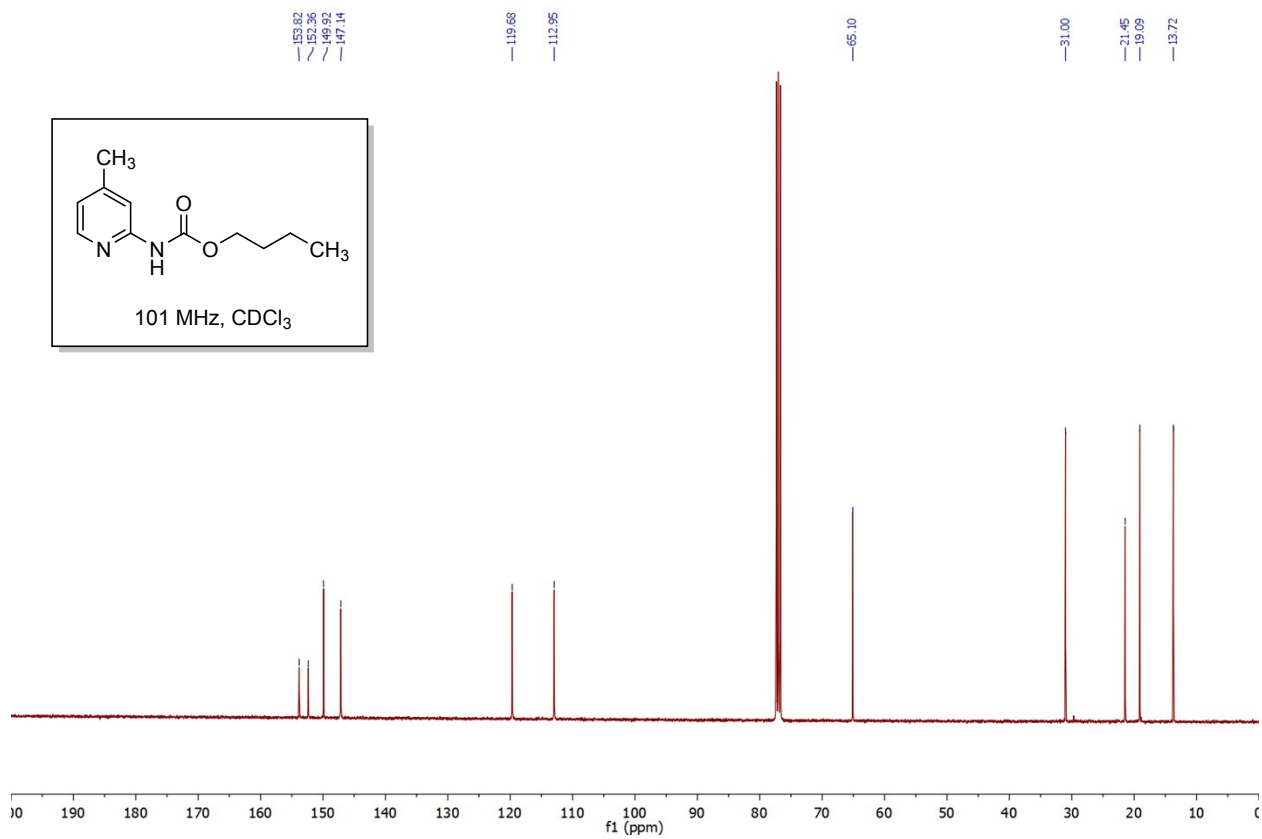



$^1\text{H}$  and  $^{13}\text{C}$  spectra of isobutyl (4-methylpyridin-2-yl)carbamate **2e**.

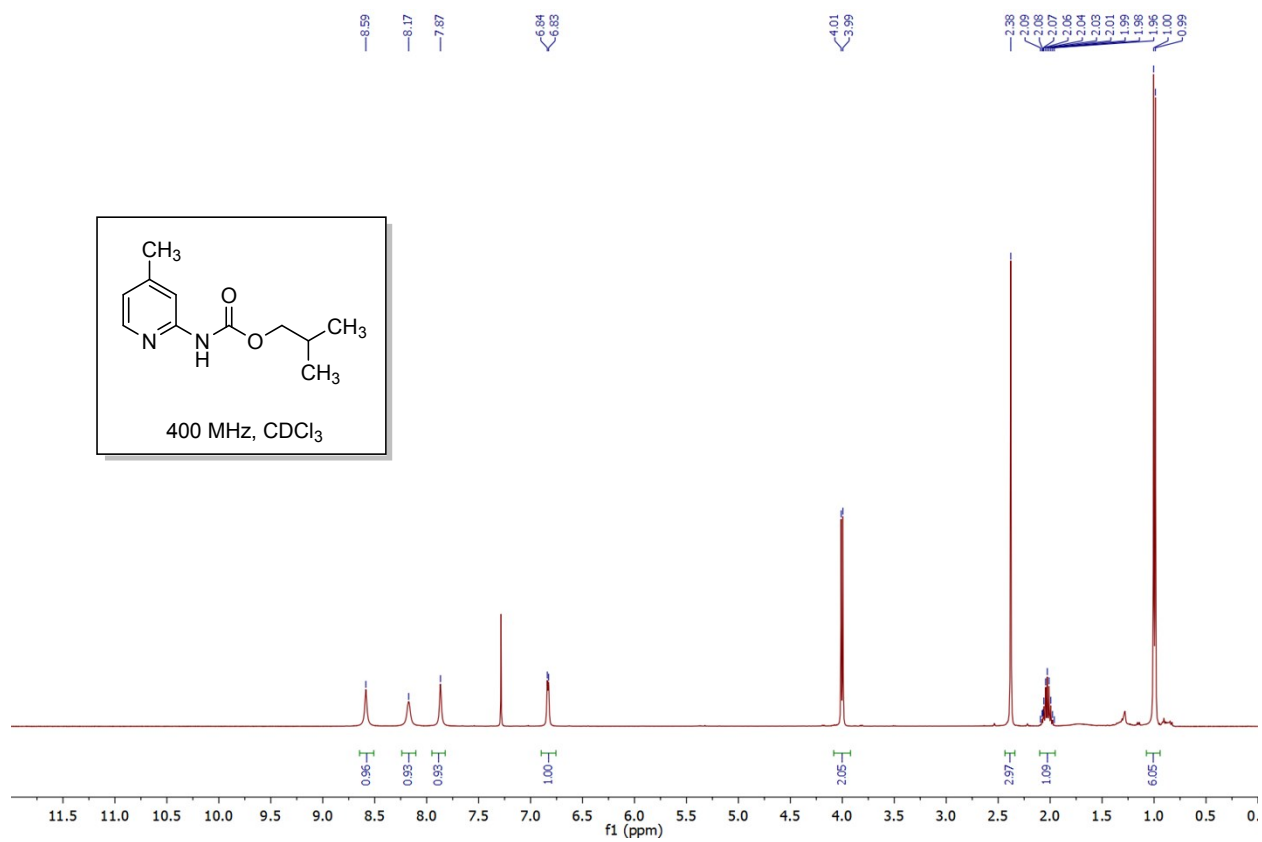

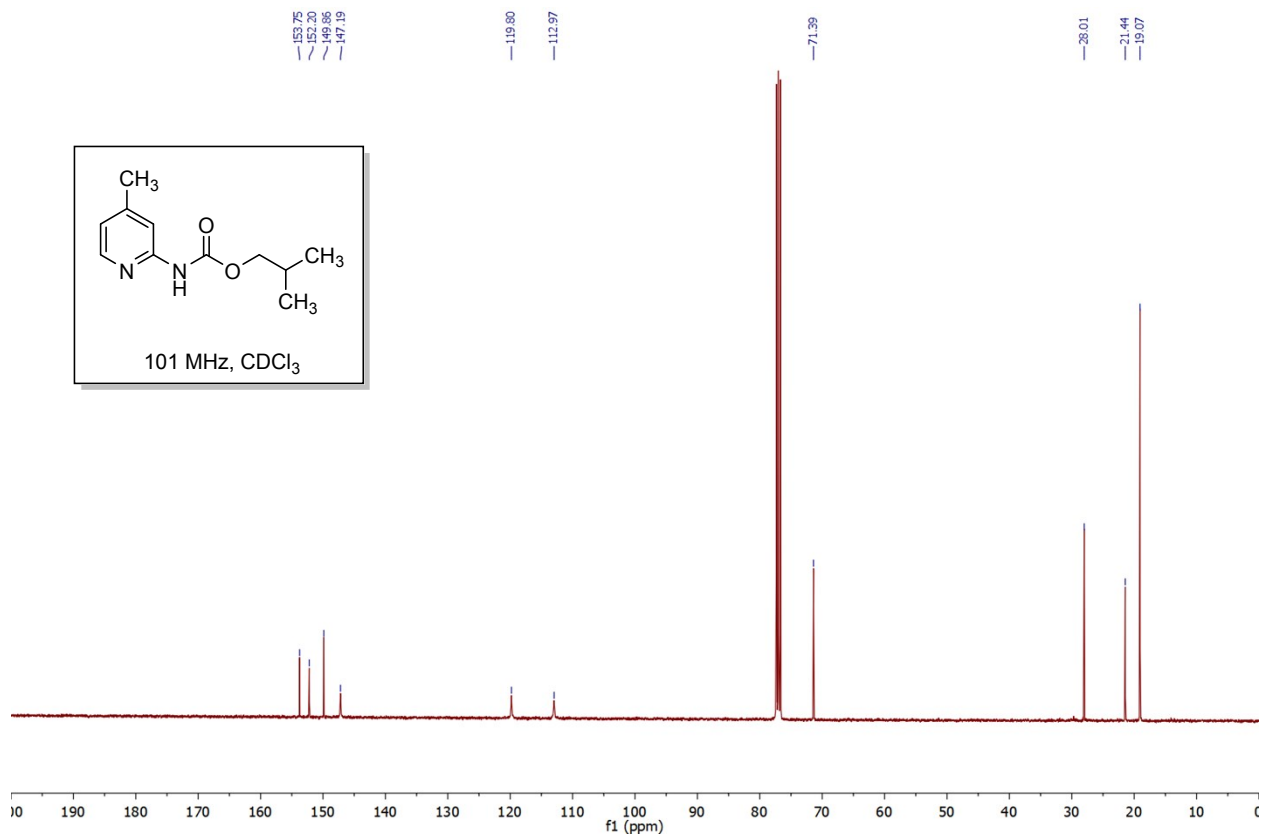

$^1\text{H}$  and  $^{13}\text{C}$  spectra of benzyl (4-methylpyridin-2-yl)carbamate **2f**.

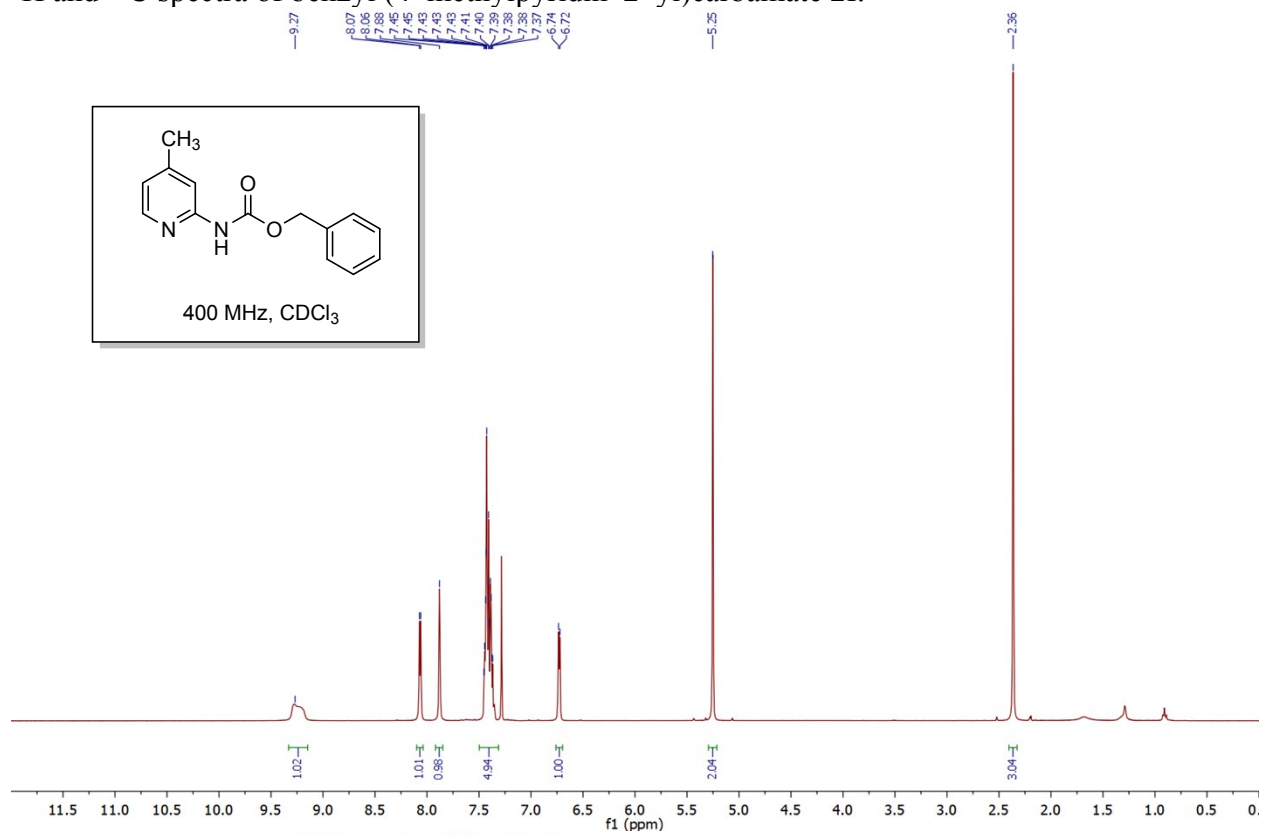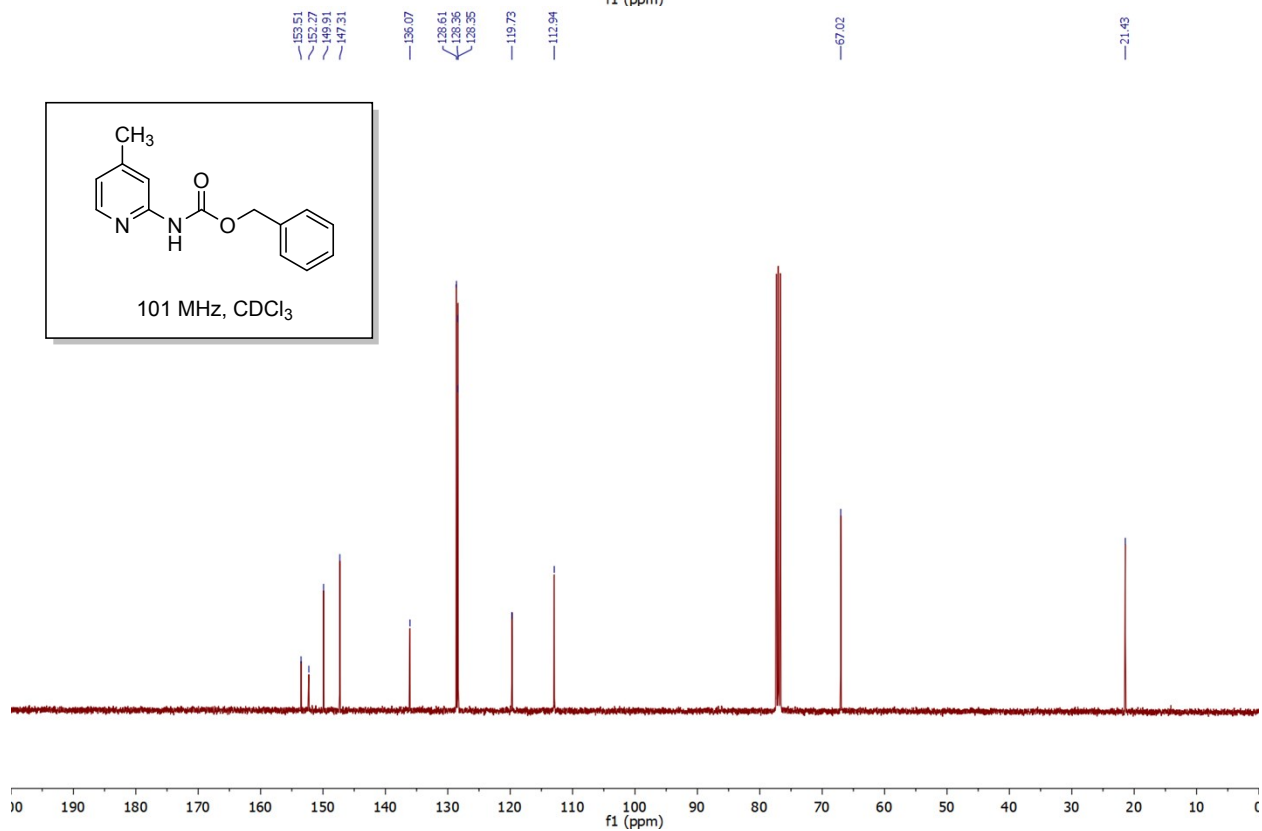

$^1\text{H}$  and  $^{13}\text{C}$  spectra of isopropyl (4-methylpyridin-2-yl)carbamate **2g**.

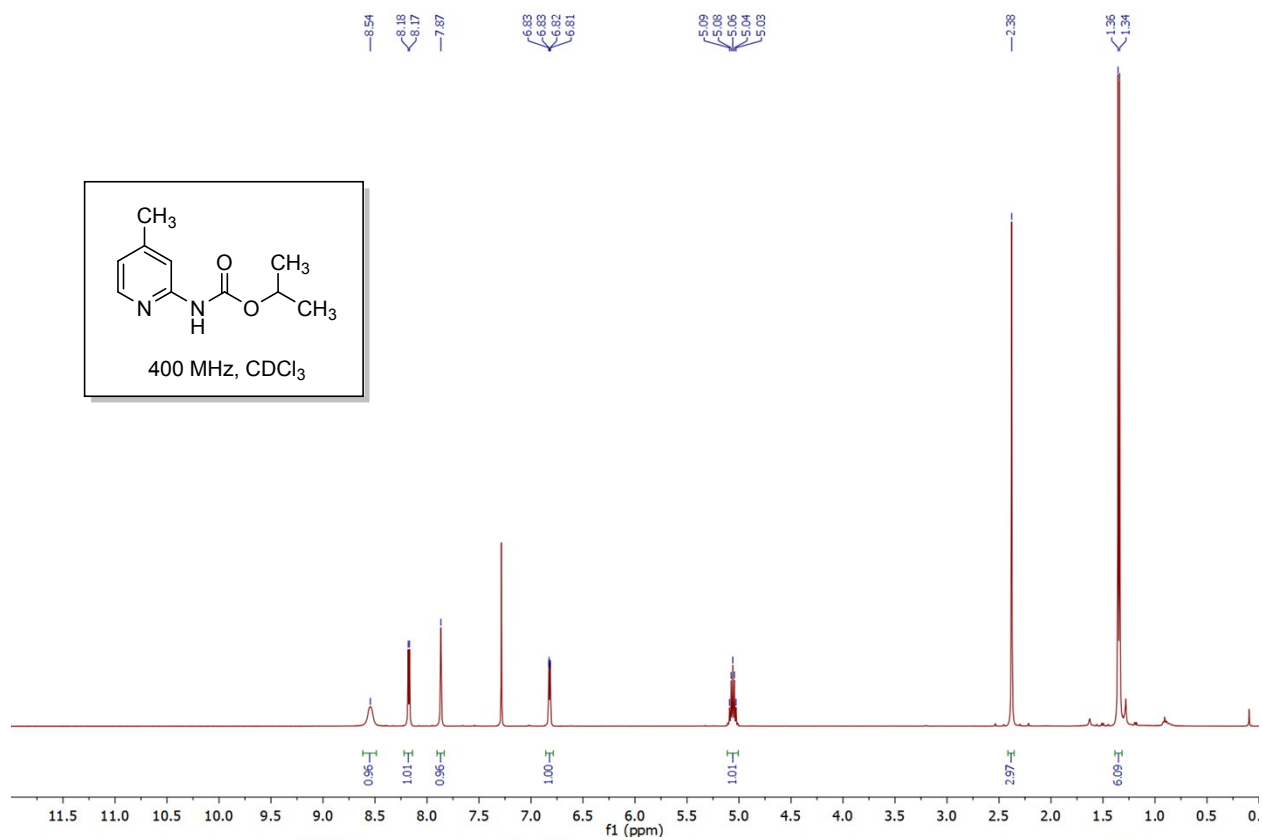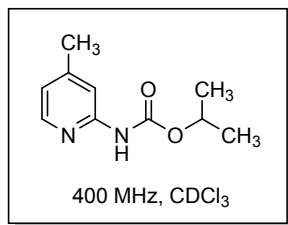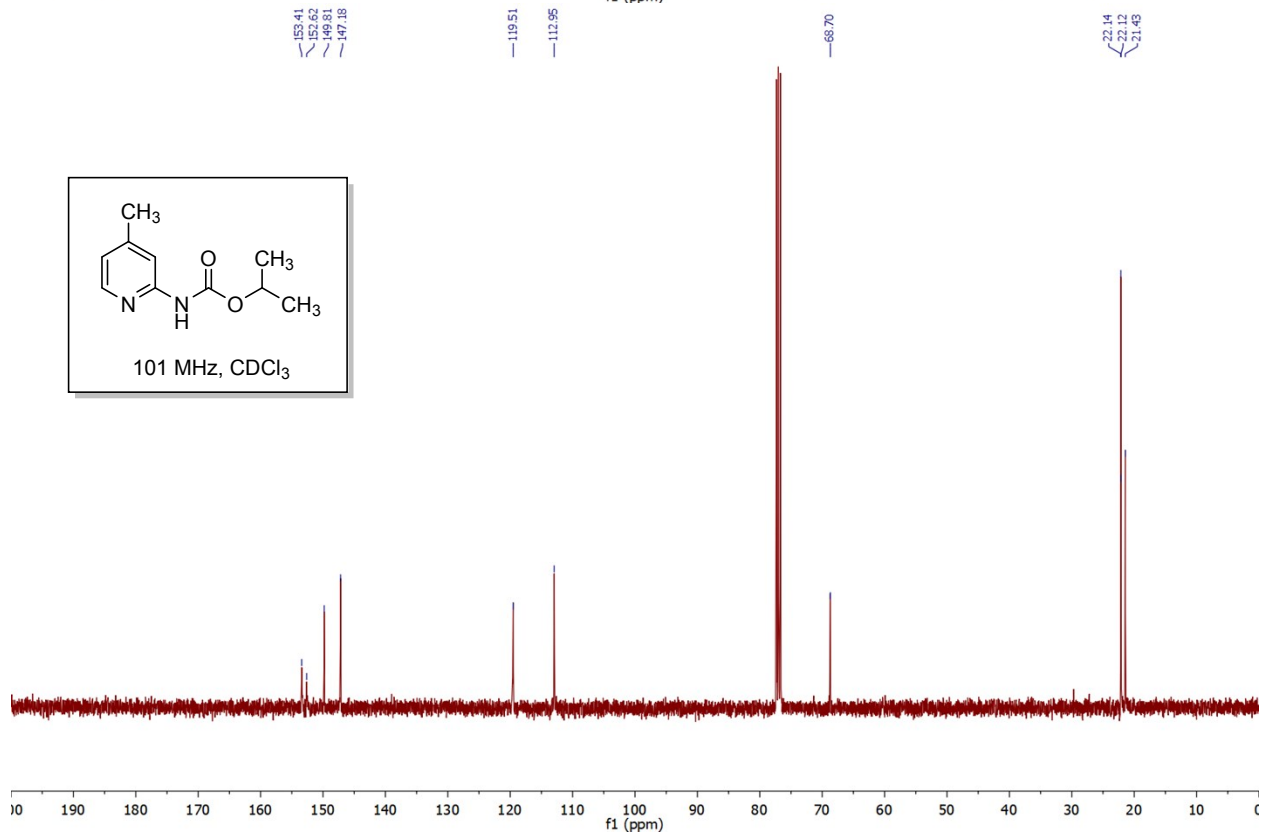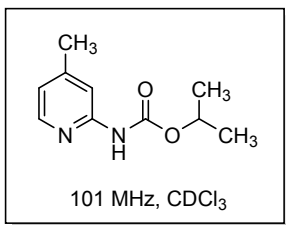

$^1\text{H}$  and  $^{13}\text{C}$  spectra of *sec*-butyl (4-methylpyridin-2-yl)carbamate **2h**.

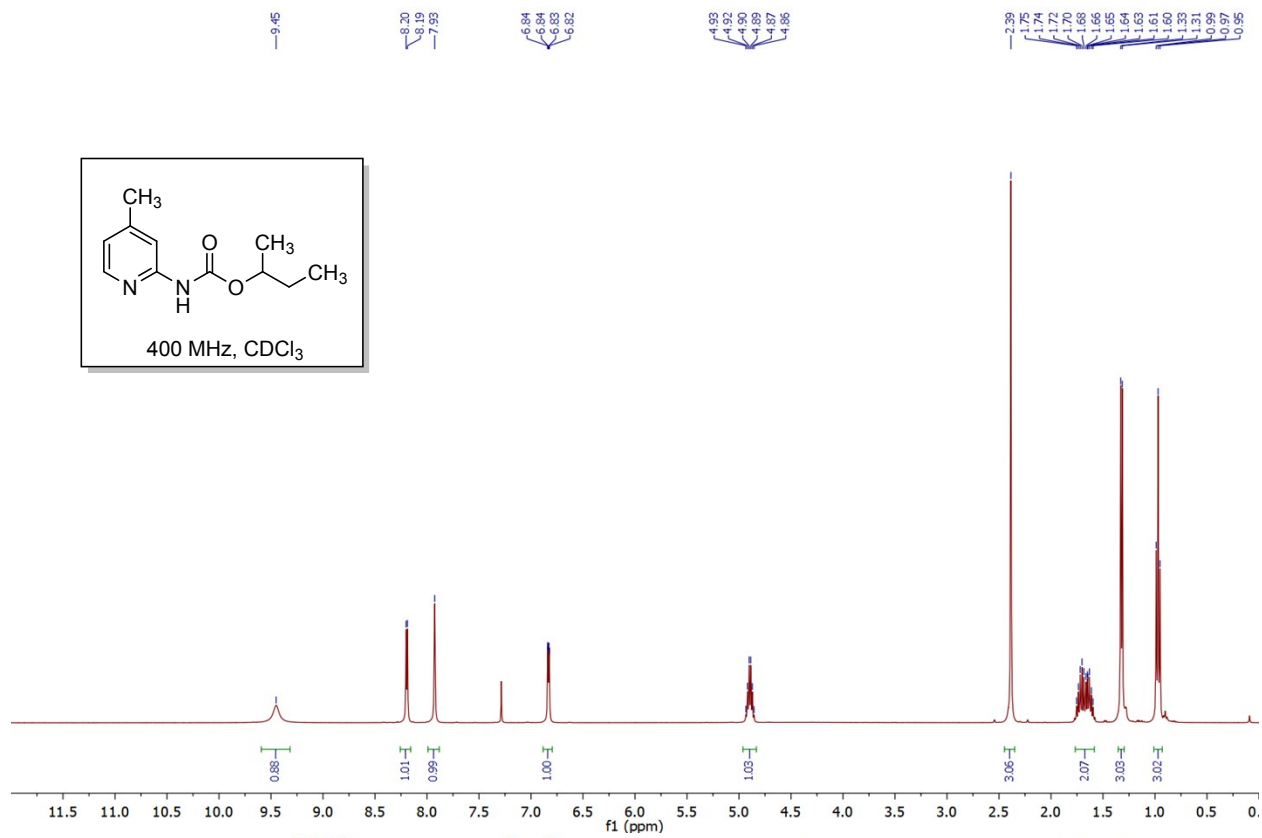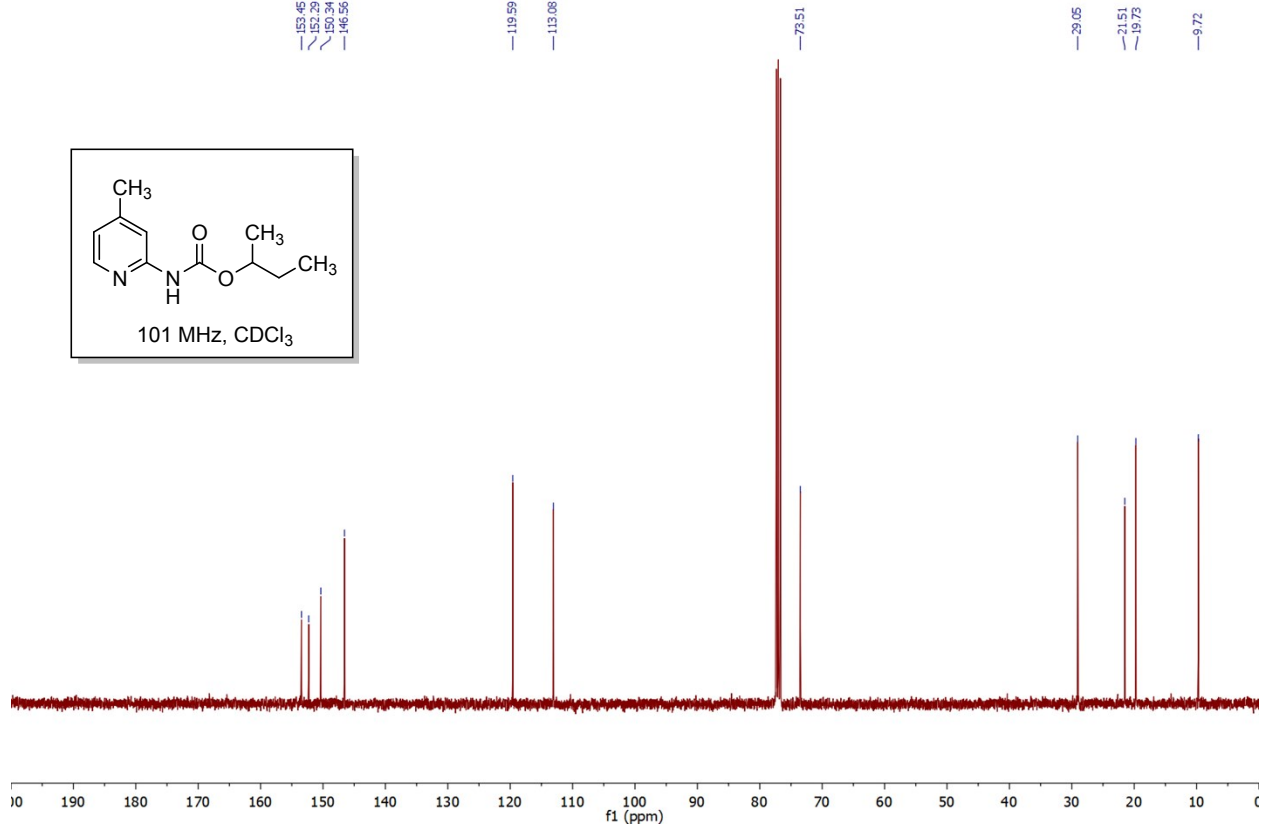

$^1\text{H}$  and  $^{13}\text{C}$  spectra of cyclohexyl (4-methylpyridin-2-yl)carbamate **2i**.

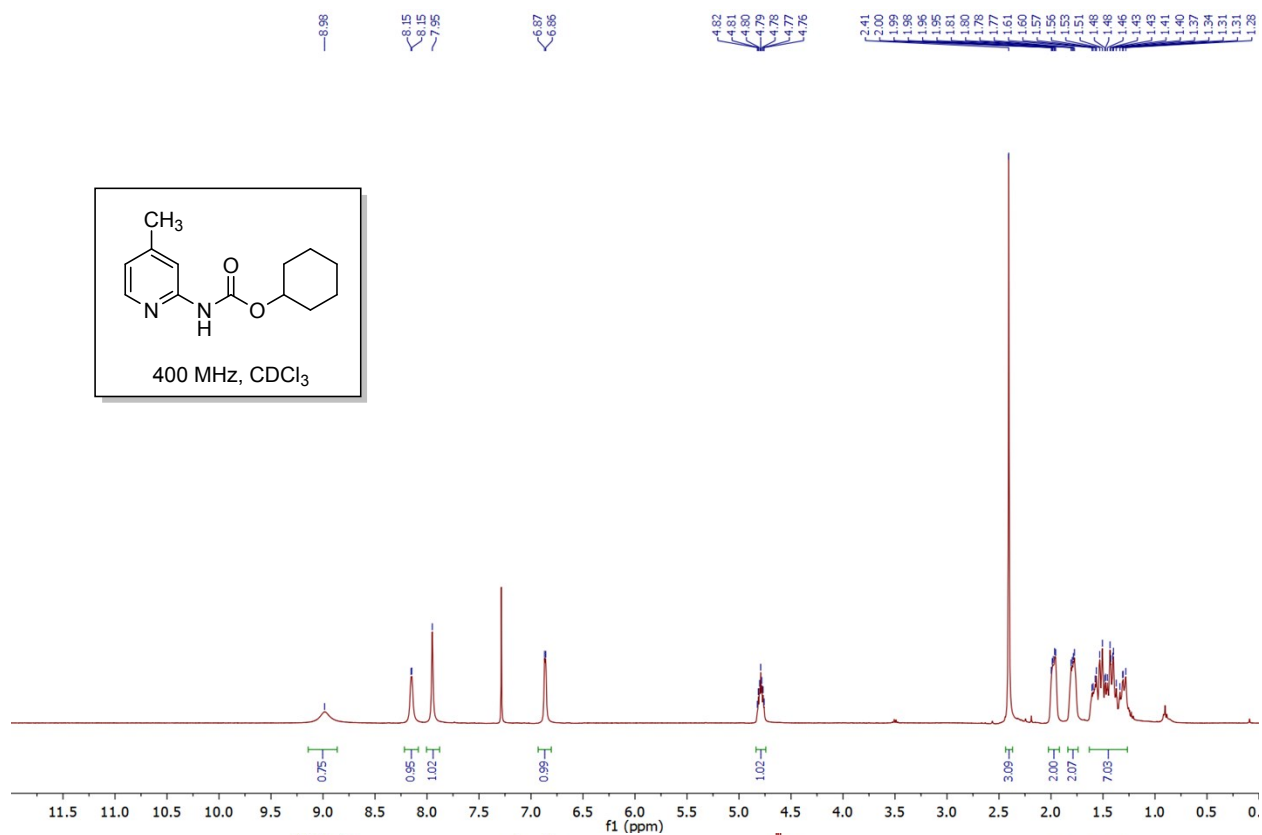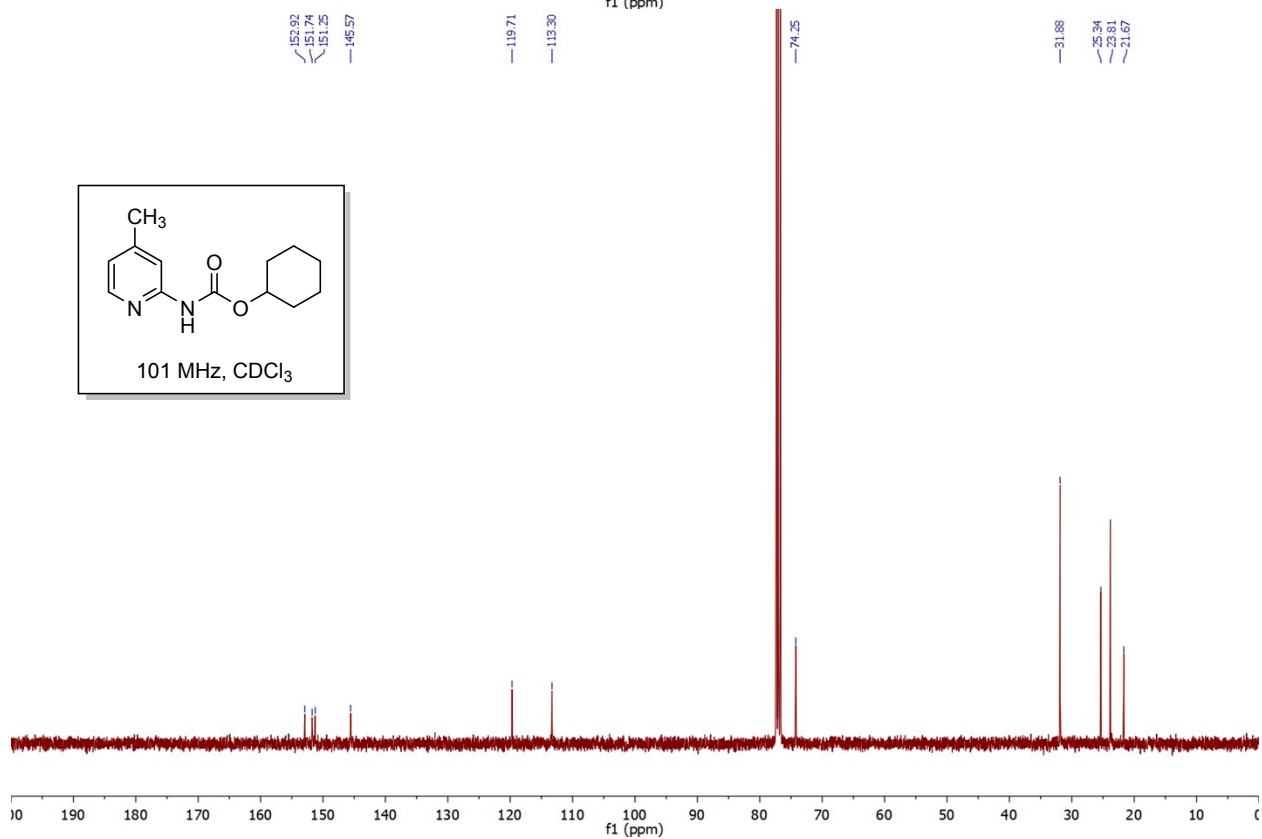

<sup>1</sup>H and <sup>13</sup>C spectra of 2-methoxyethyl (4-methylpyridin-2-yl)carbamate **2j**.

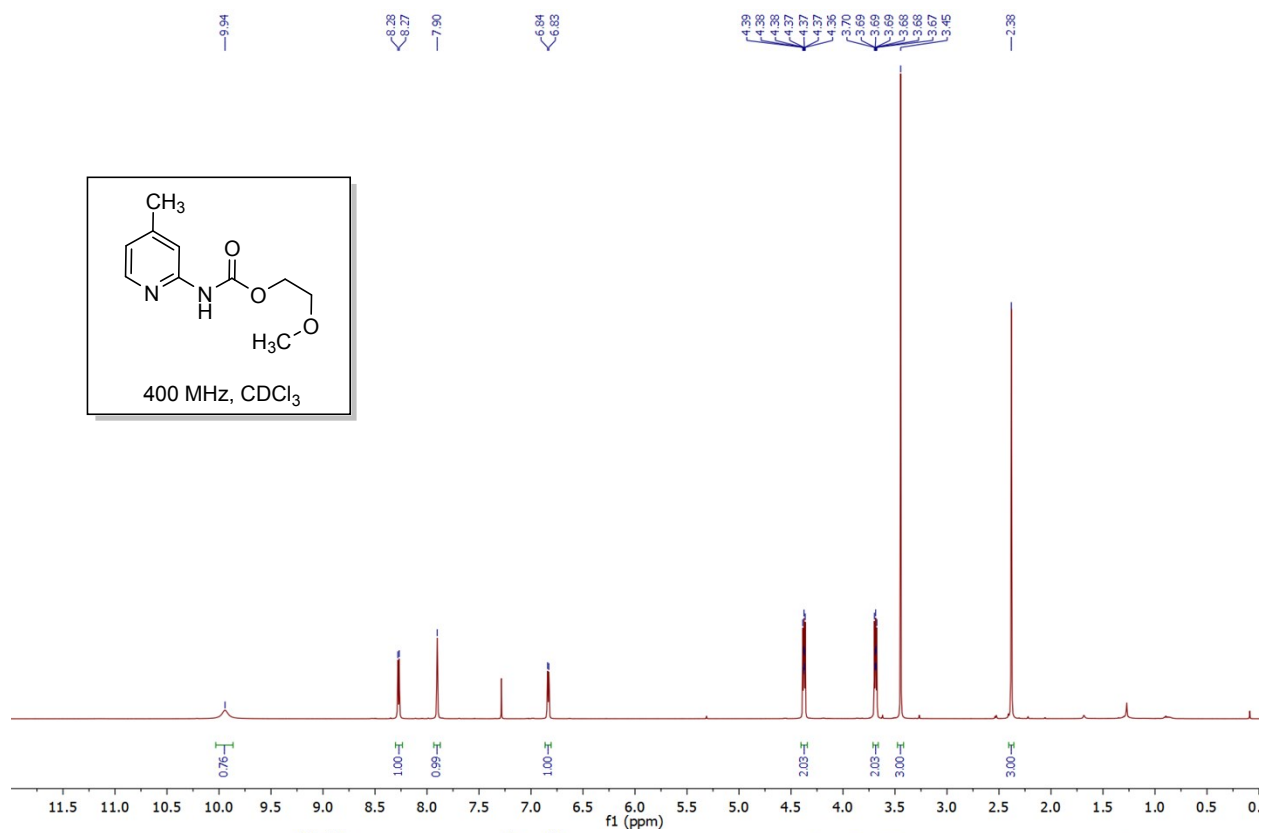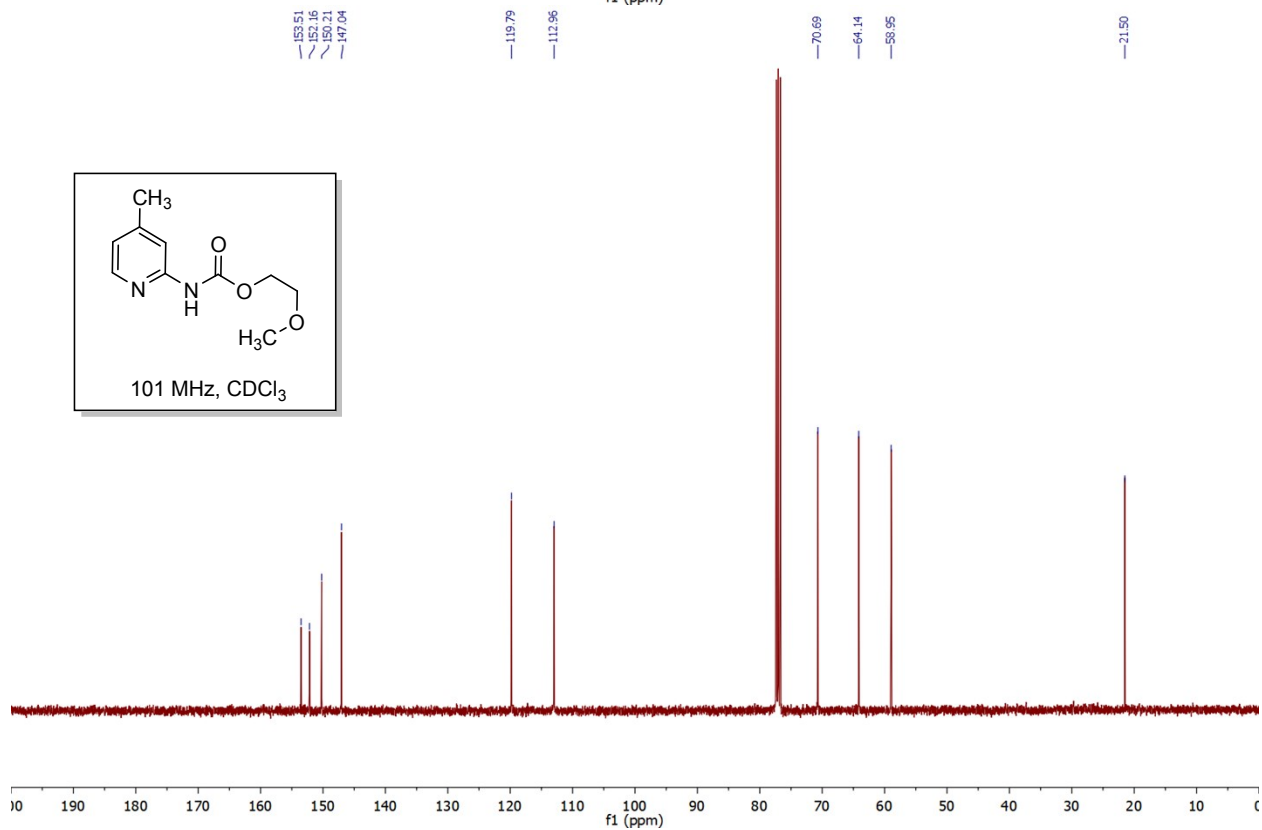

$^1\text{H}$ ,  $^{13}\text{C}$  and  $^{19}\text{F}$  spectra of 2,2,2-trifluoroethyl (4-methylpyridin-2-yl)carbamate **2k**.

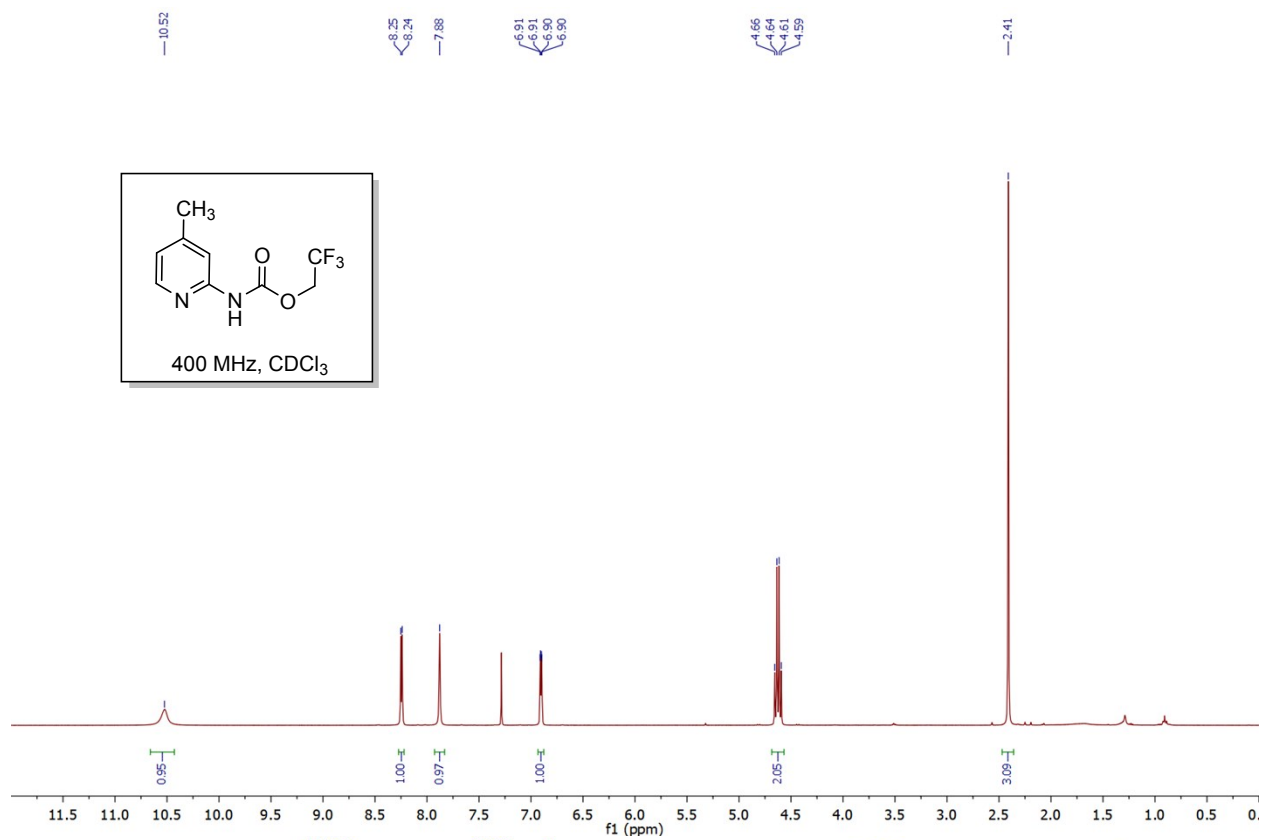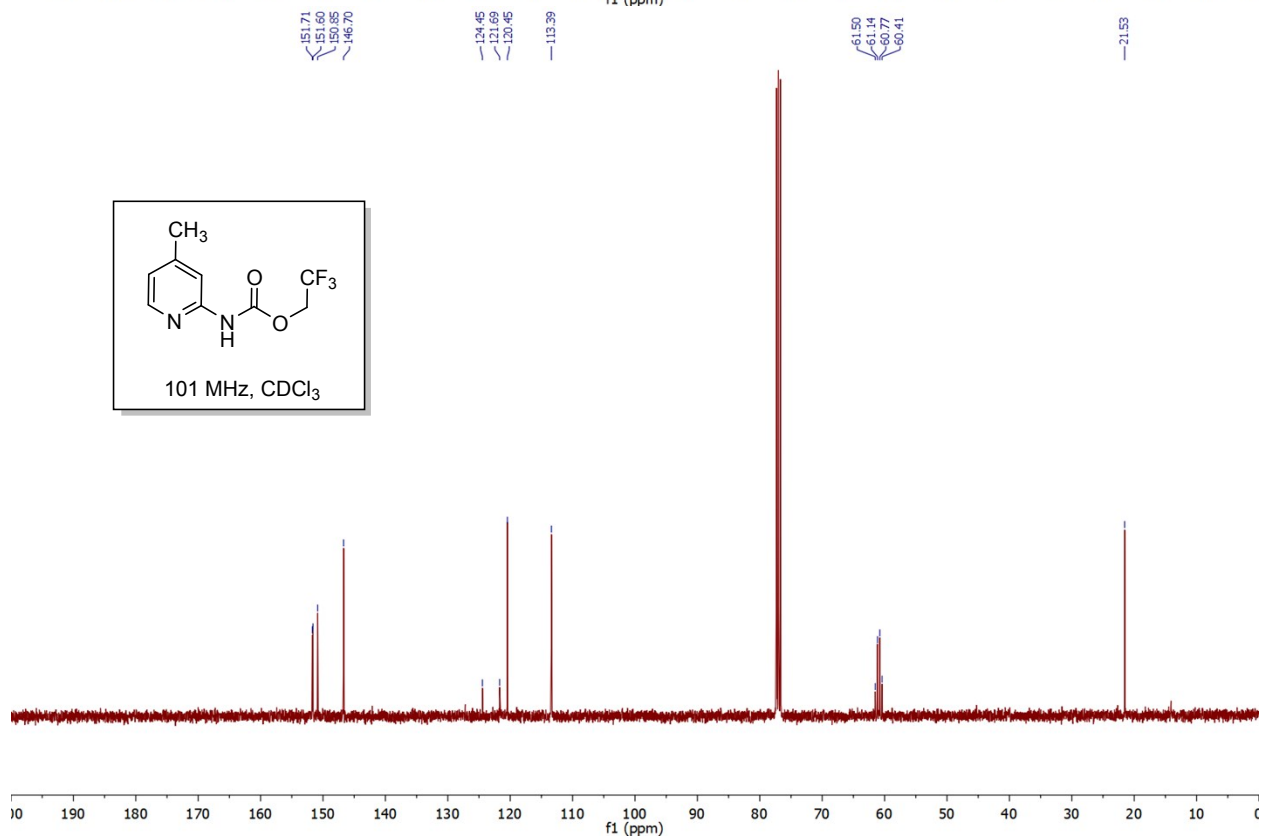



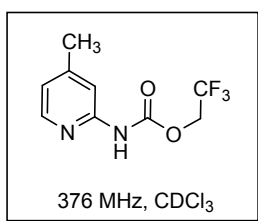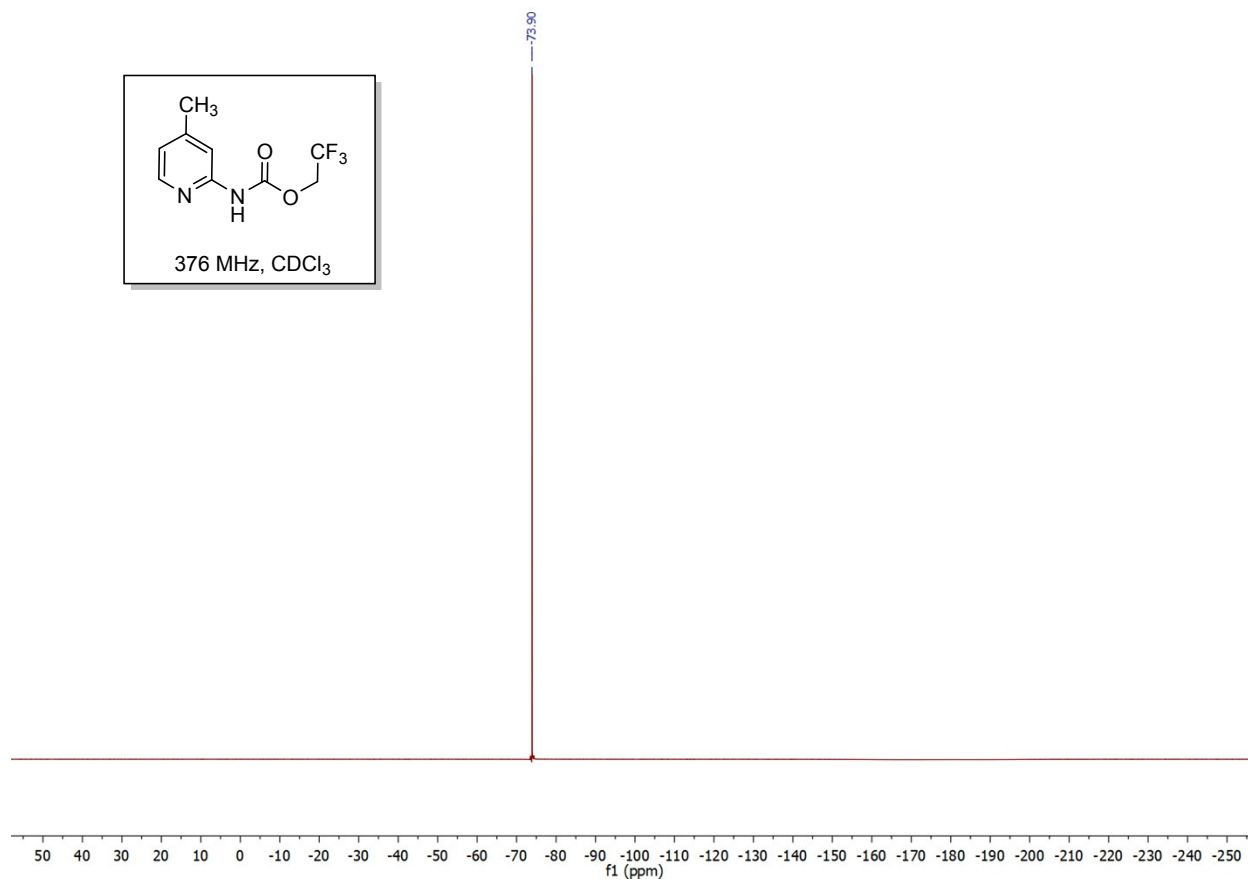

$^1\text{H}$ ,  $^{13}\text{C}$ ,  $^{19}\text{F}$  spectra of 2,2,3,3,4,4,5,5-octafluoropentyl (4-methylpyridin-2-yl)carbamate **21**.

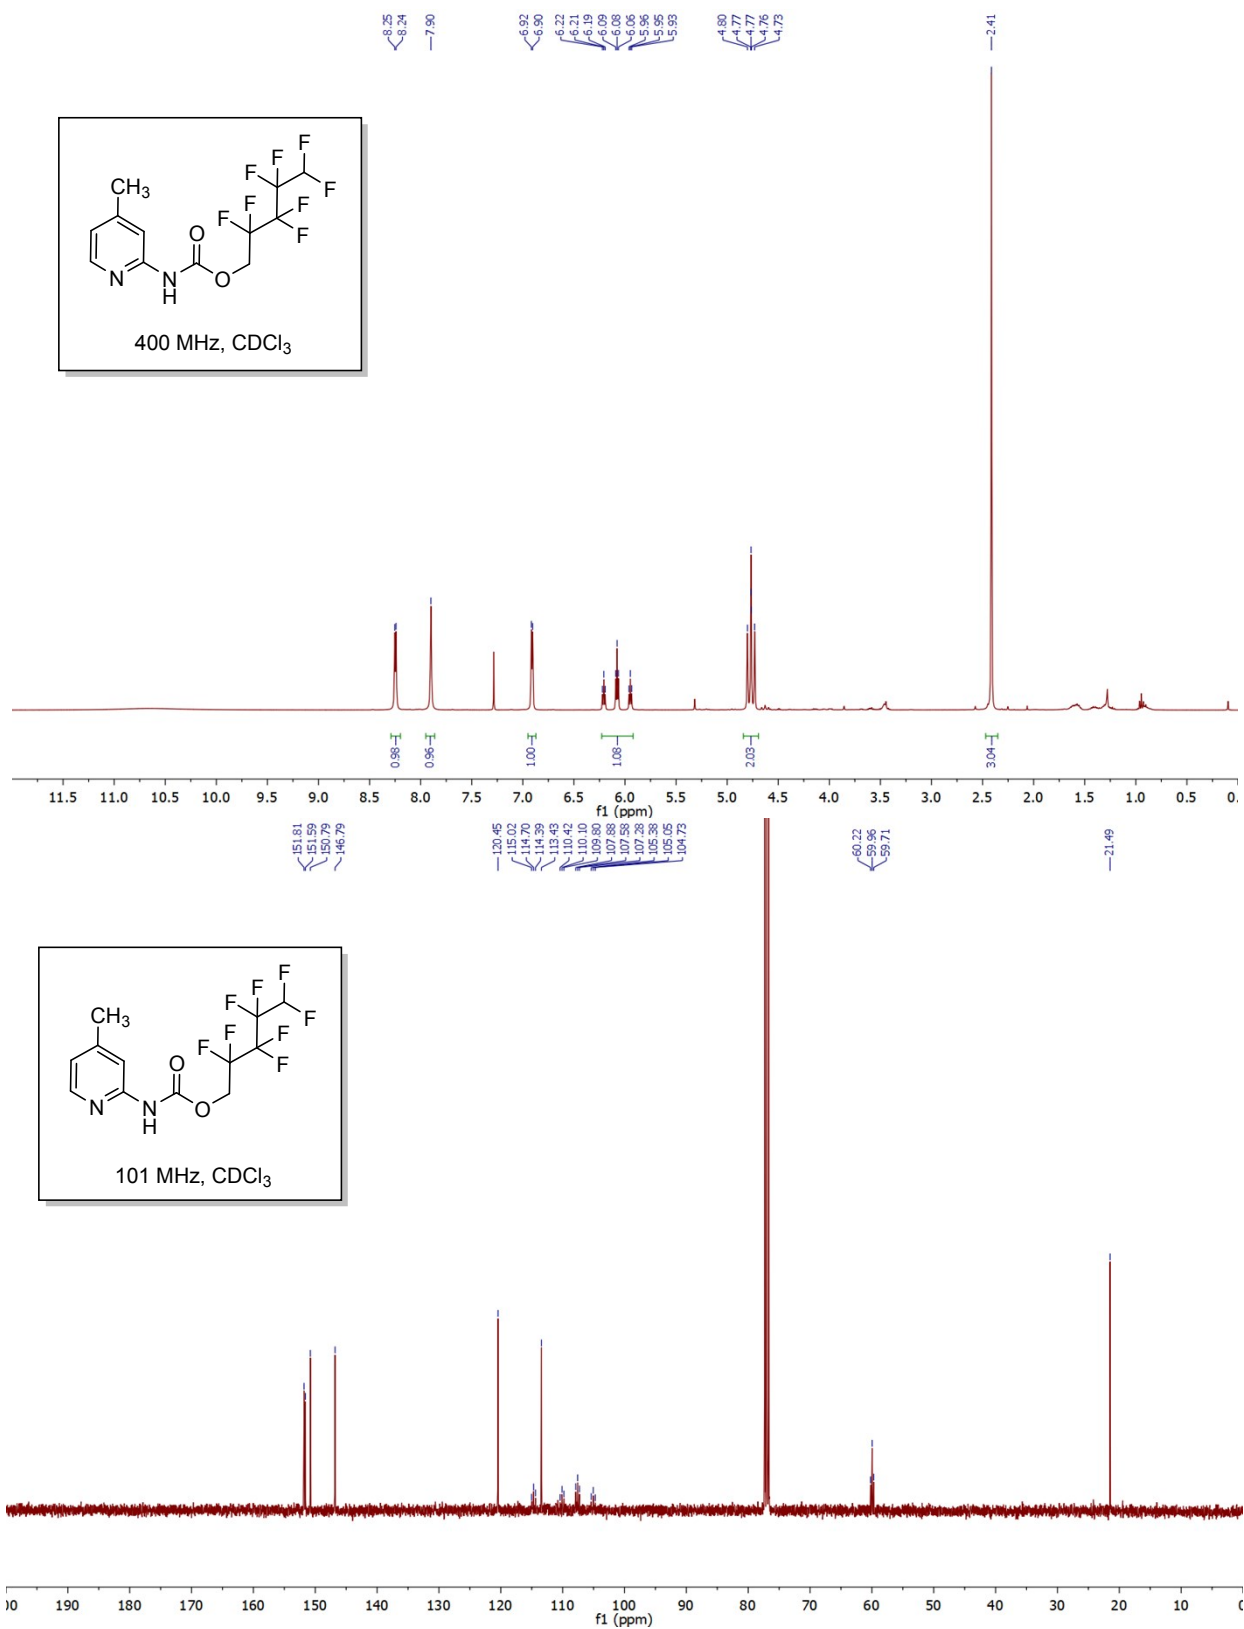

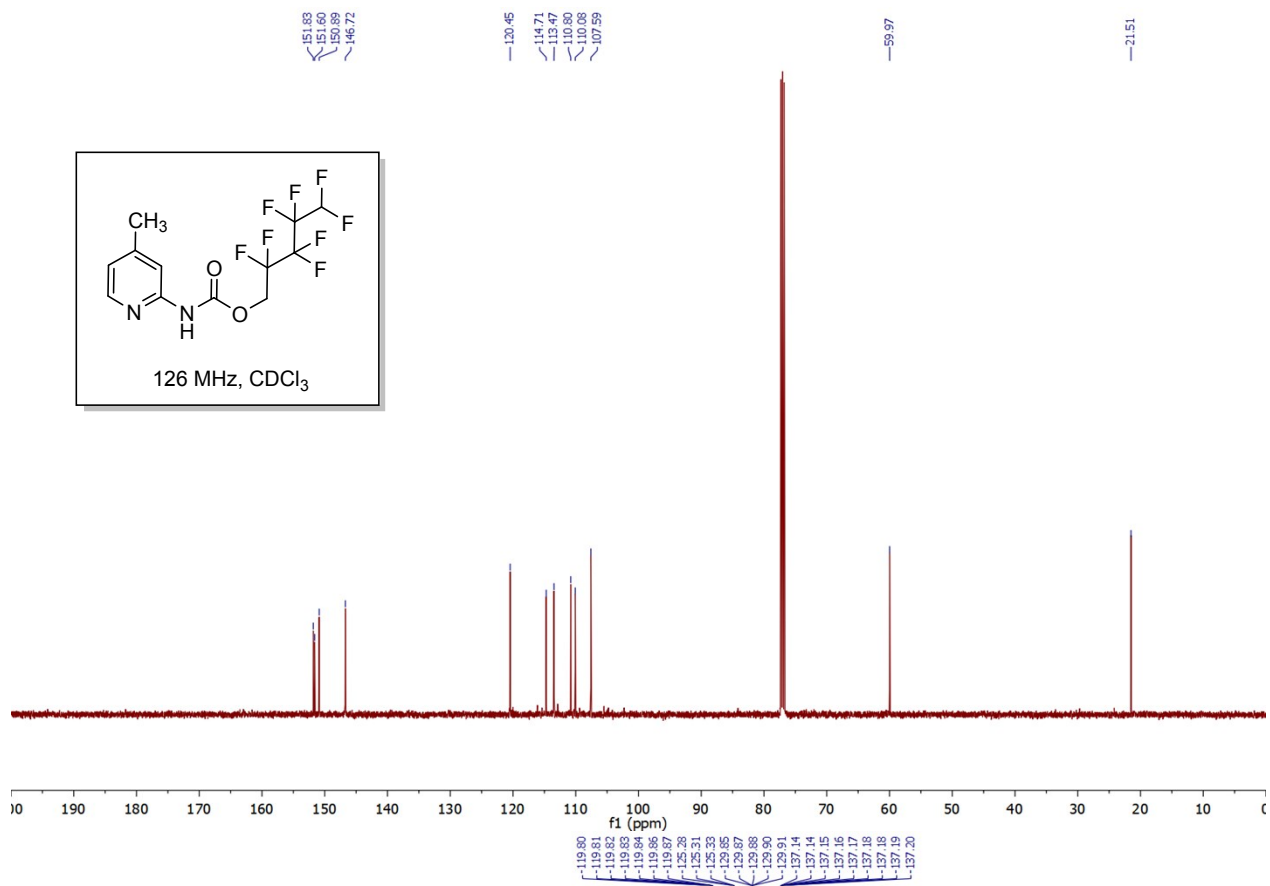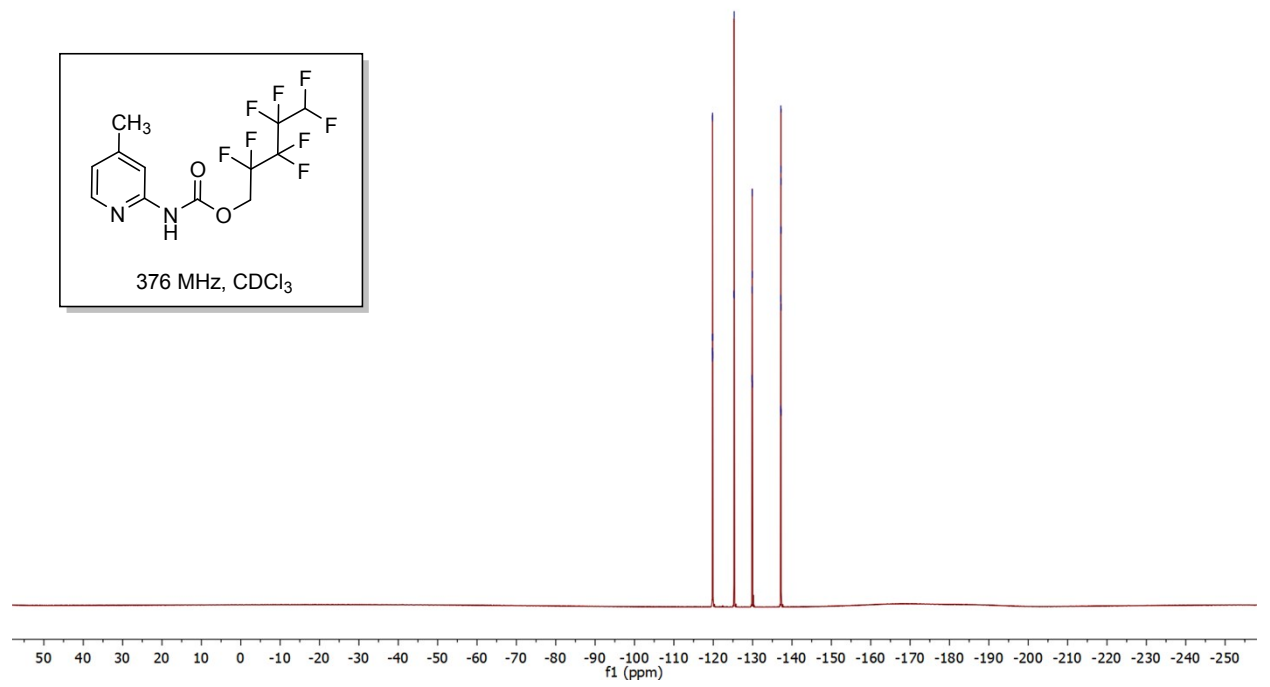

$^1\text{H}$  and  $^{13}\text{C}$  spectra of *tert*-butyl (4-methylpyridin-2-yl)carbamate **2m**.

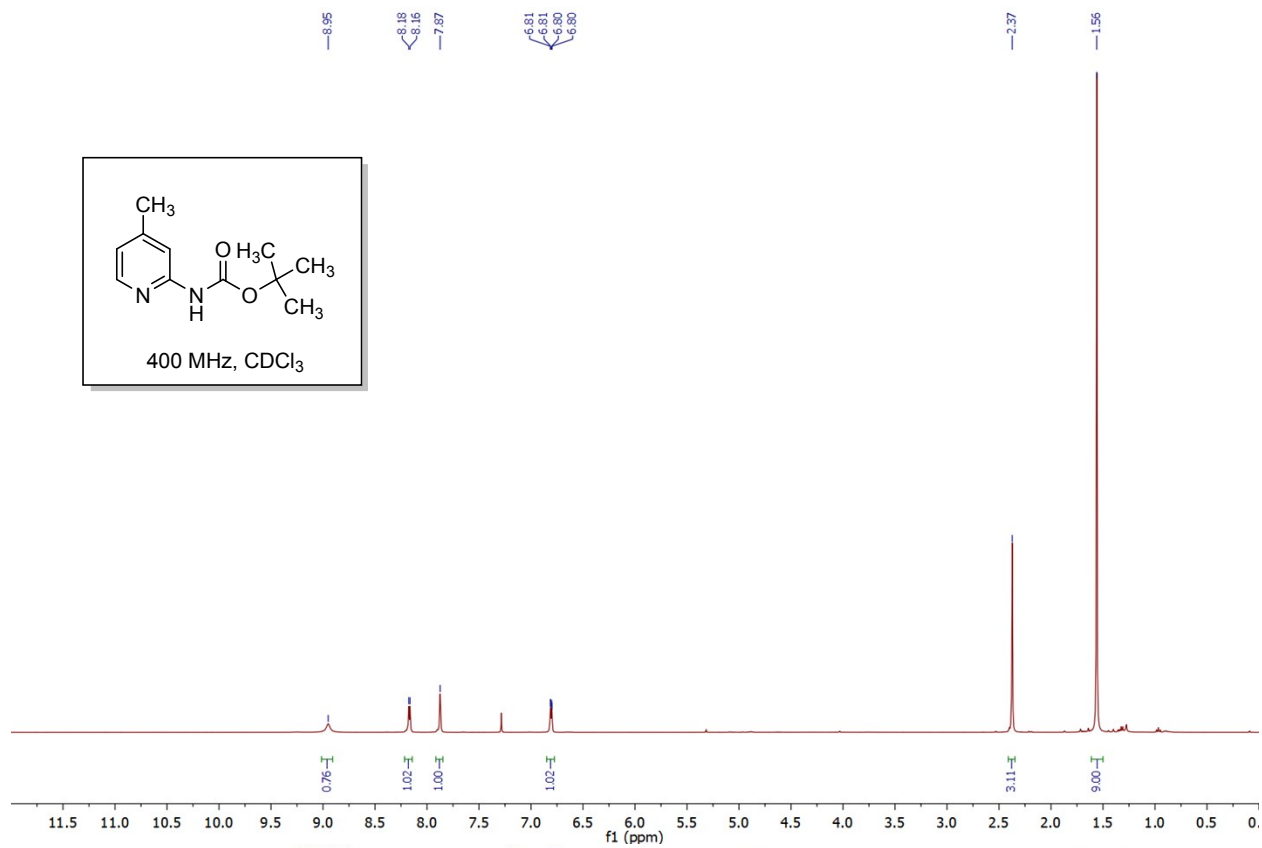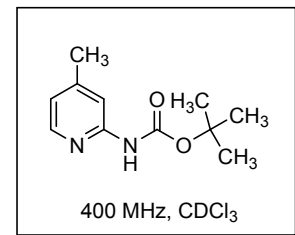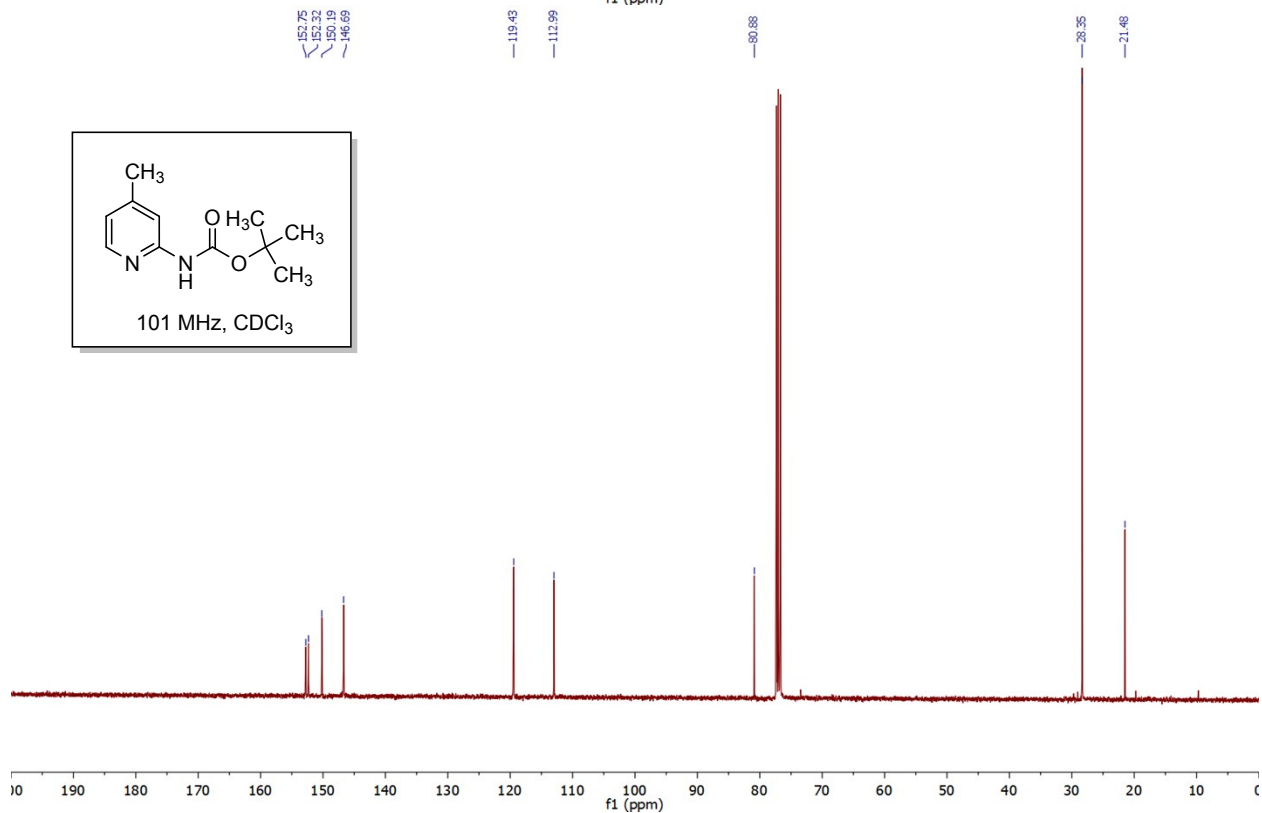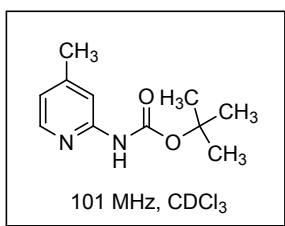

$^1\text{H}$  and  $^{13}\text{C}$  spectra of ethyl pyridin-2-ylcarbamate **2n**.

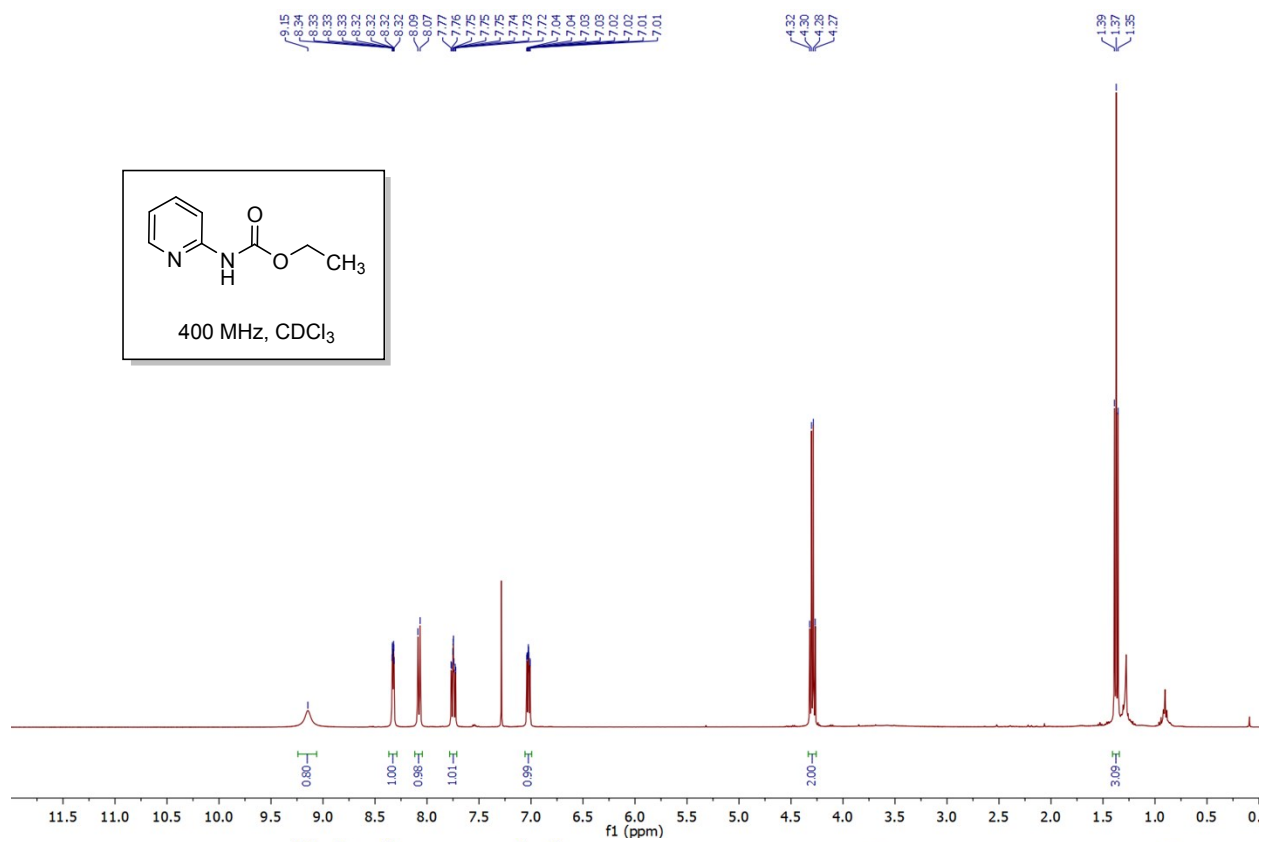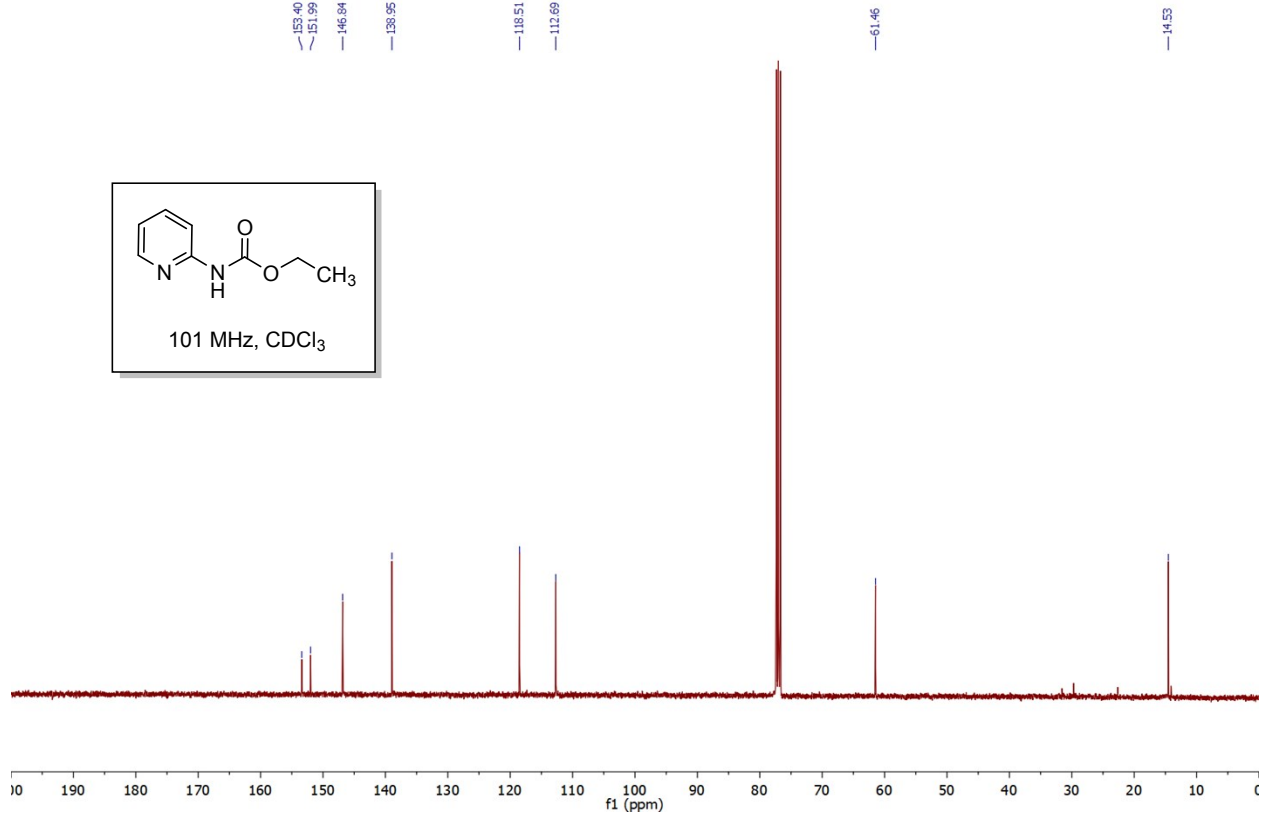

$^1\text{H}$  and  $^{13}\text{C}$  spectra of ethyl (4-methoxypyridin-2-yl)carbamate **2o**.

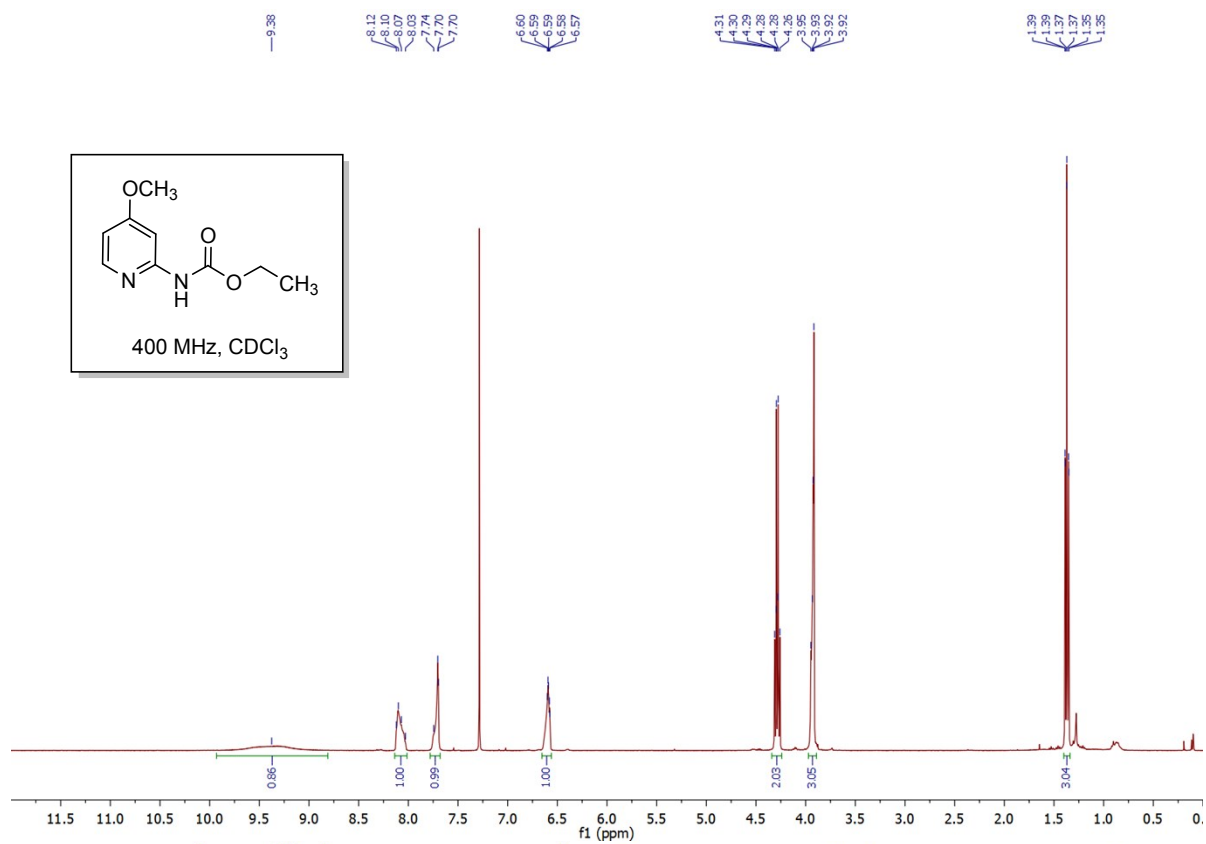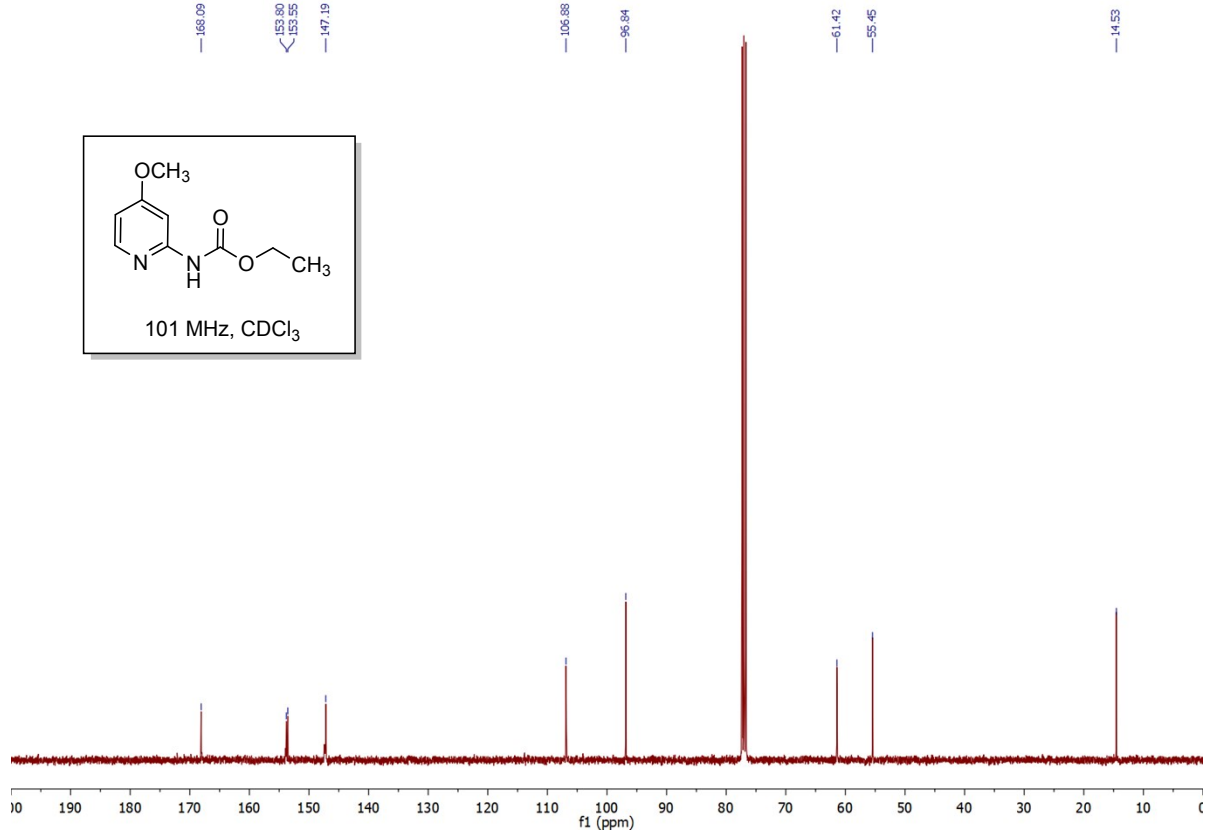

$^1\text{H}$  and  $^{13}\text{C}$  spectra of ethyl (4-nitropyridin-2-yl)carbamate **2p**.

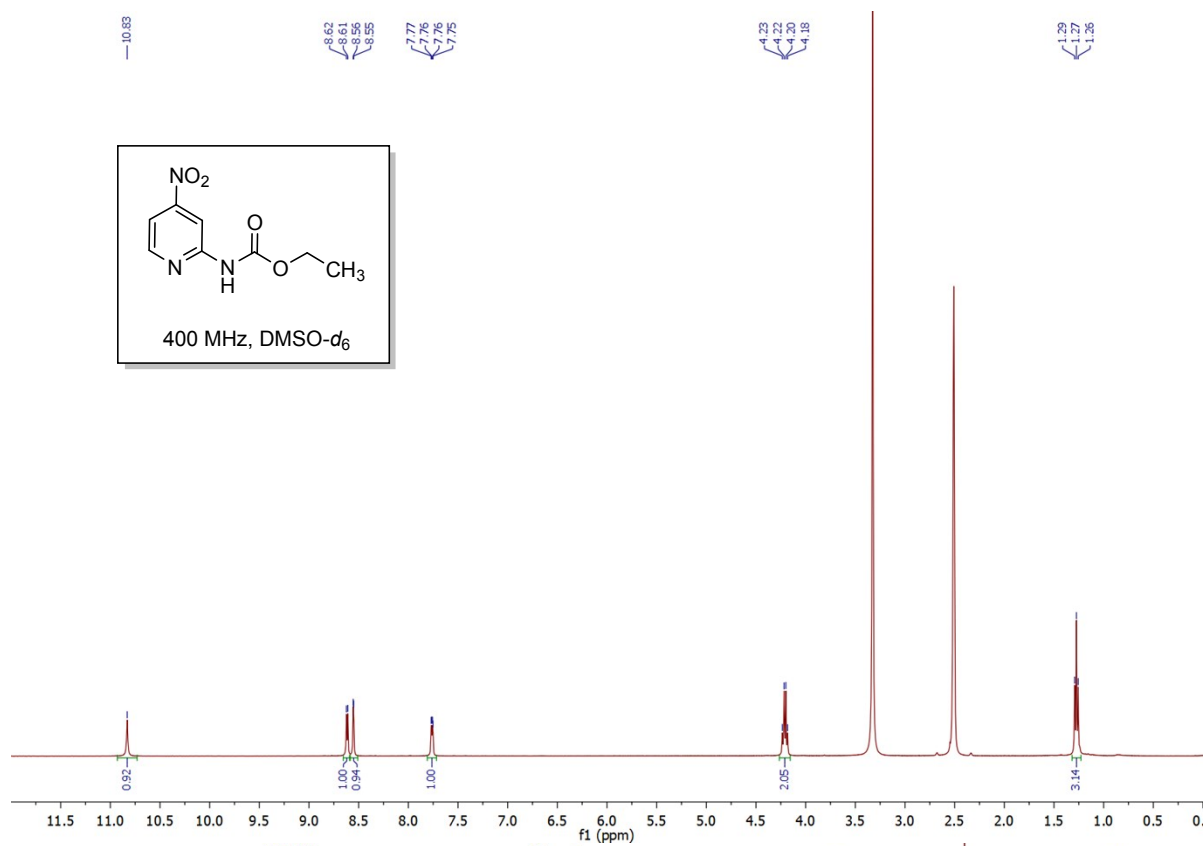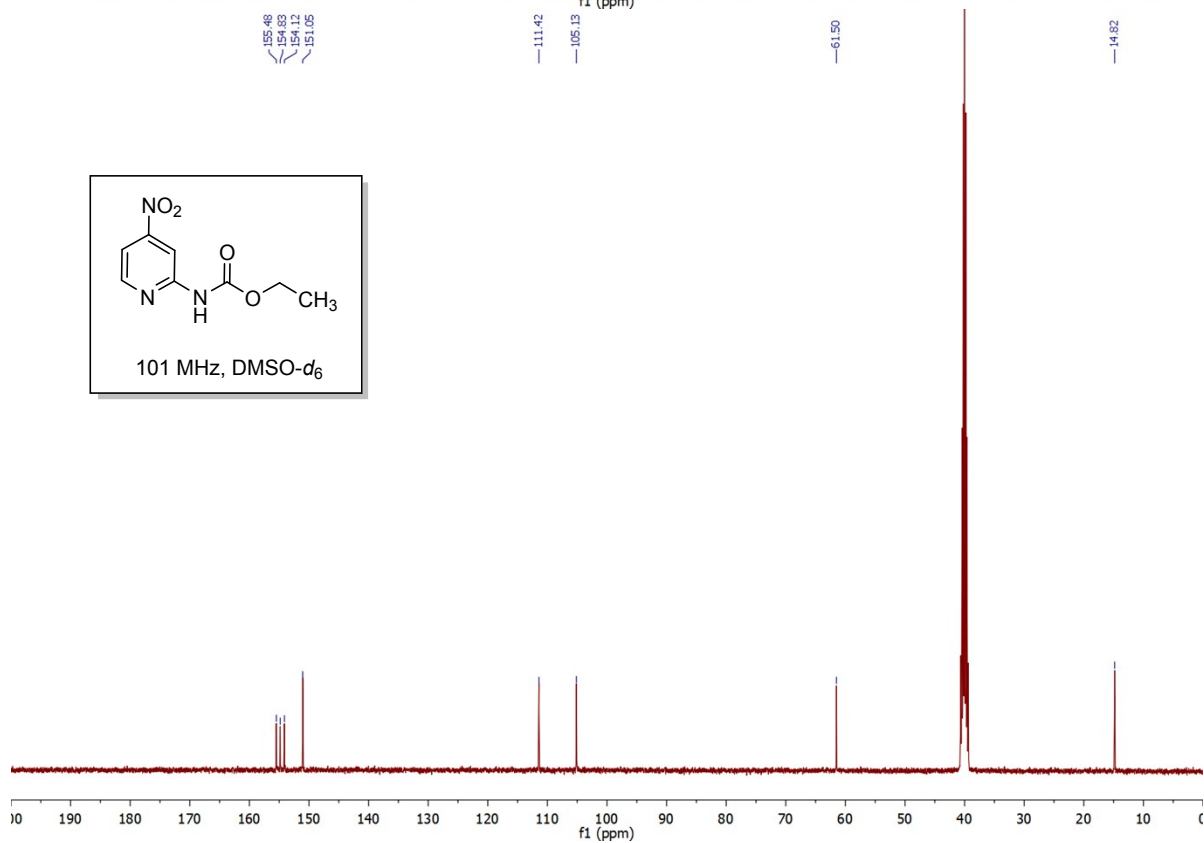

$^1\text{H}$  and  $^{13}\text{C}$  spectra ethyl (4-cyanopyridin-2-yl)carbamate **2q**.

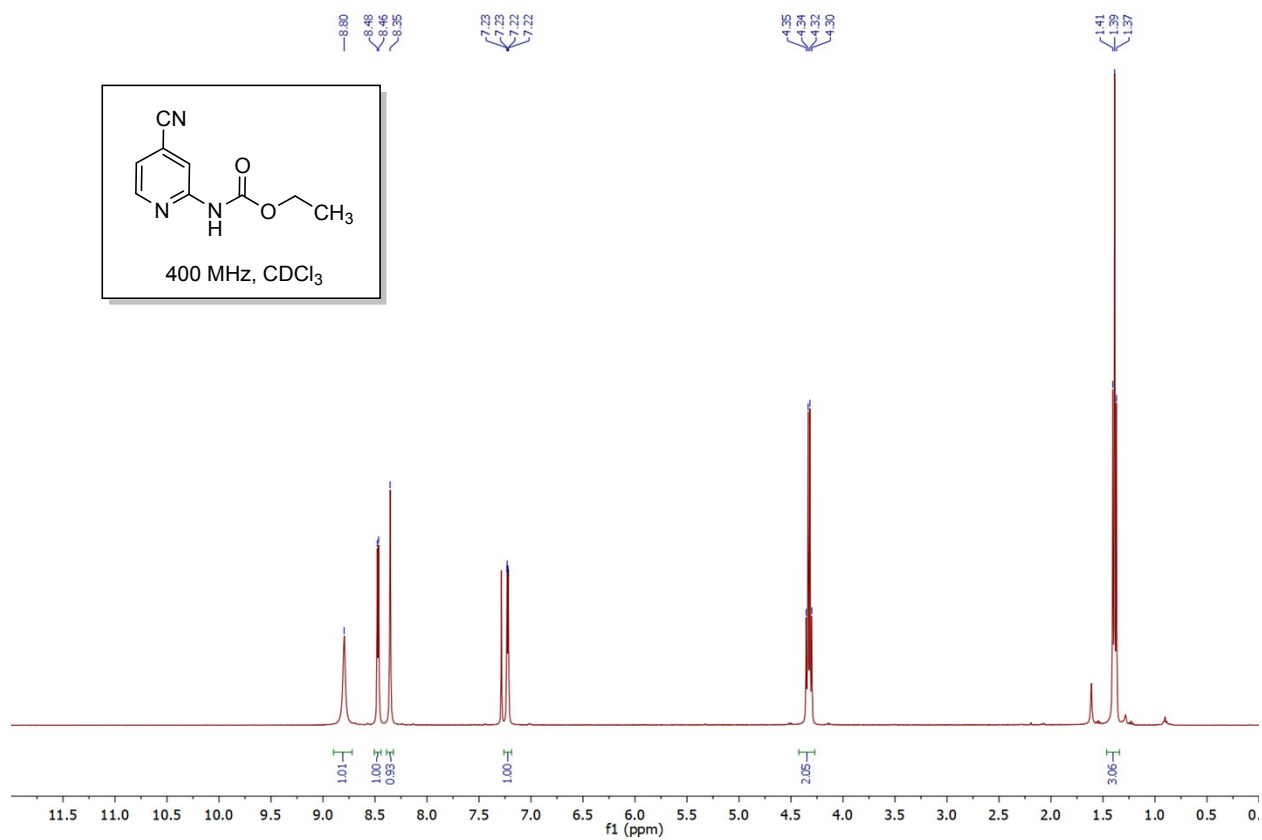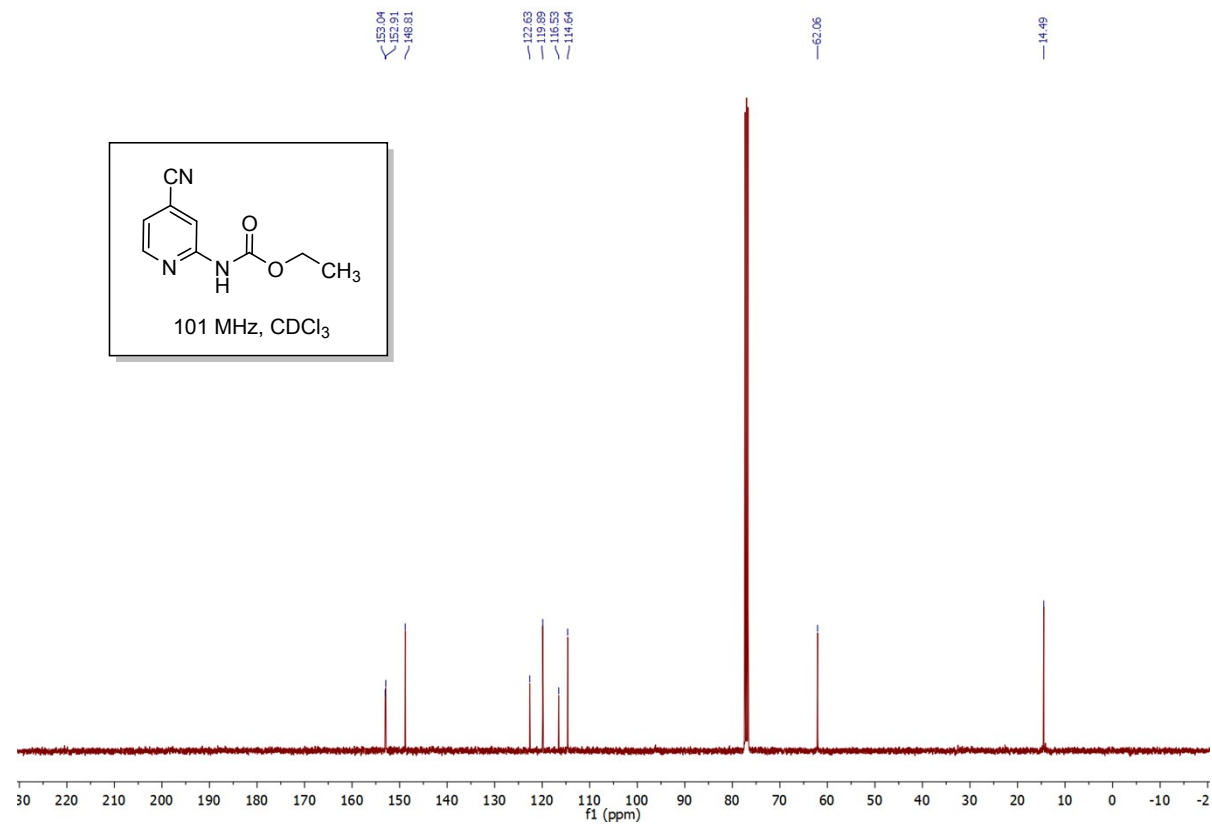



$^1\text{H}$  and  $^{13}\text{C}$  spectra of ethyl (4-(5-methyl-1,3,4-oxadiazol-2-yl)pyridin-2-yl)carbamate **2r**.

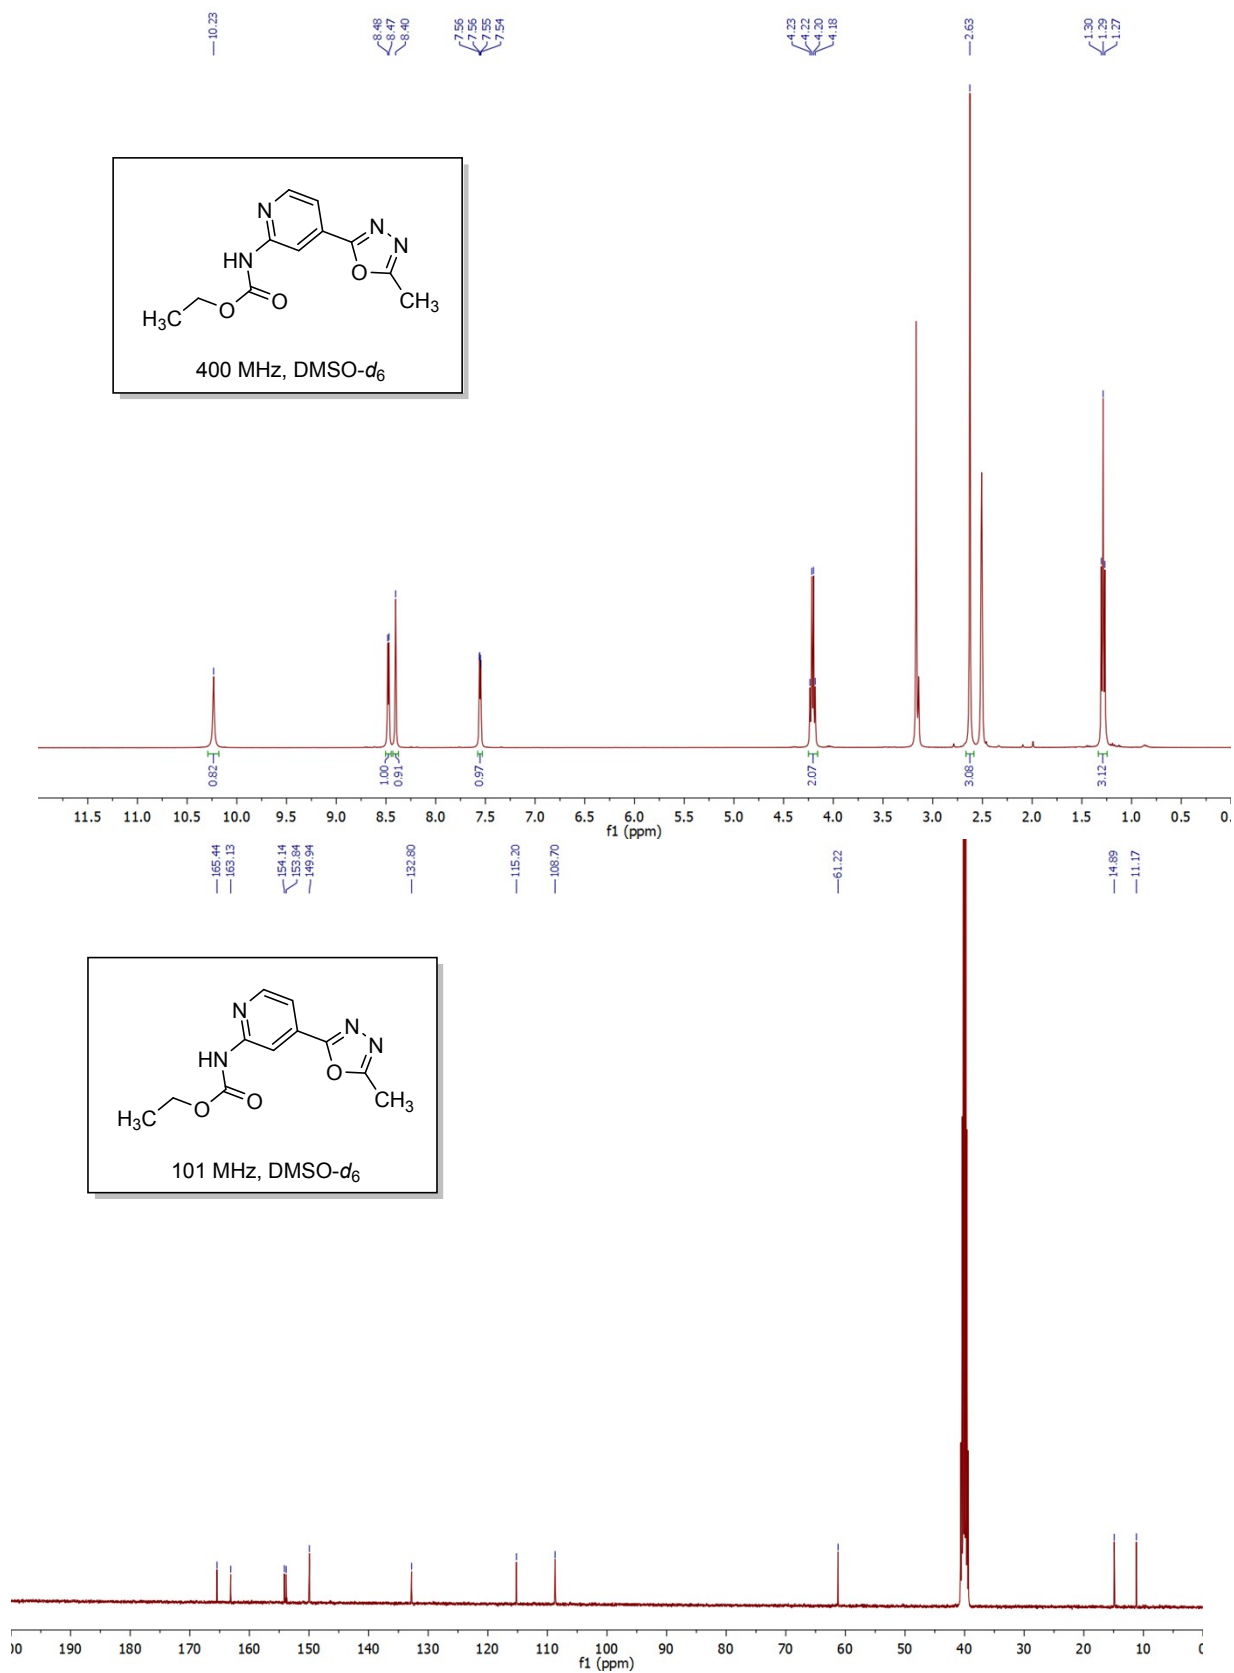

$^1\text{H}$  and  $^{13}\text{C}$  spectra of ethyl (4-(5-methyl-1,2,4-oxadiazol-3-yl)pyridin-2-yl)carbamate **2s**.

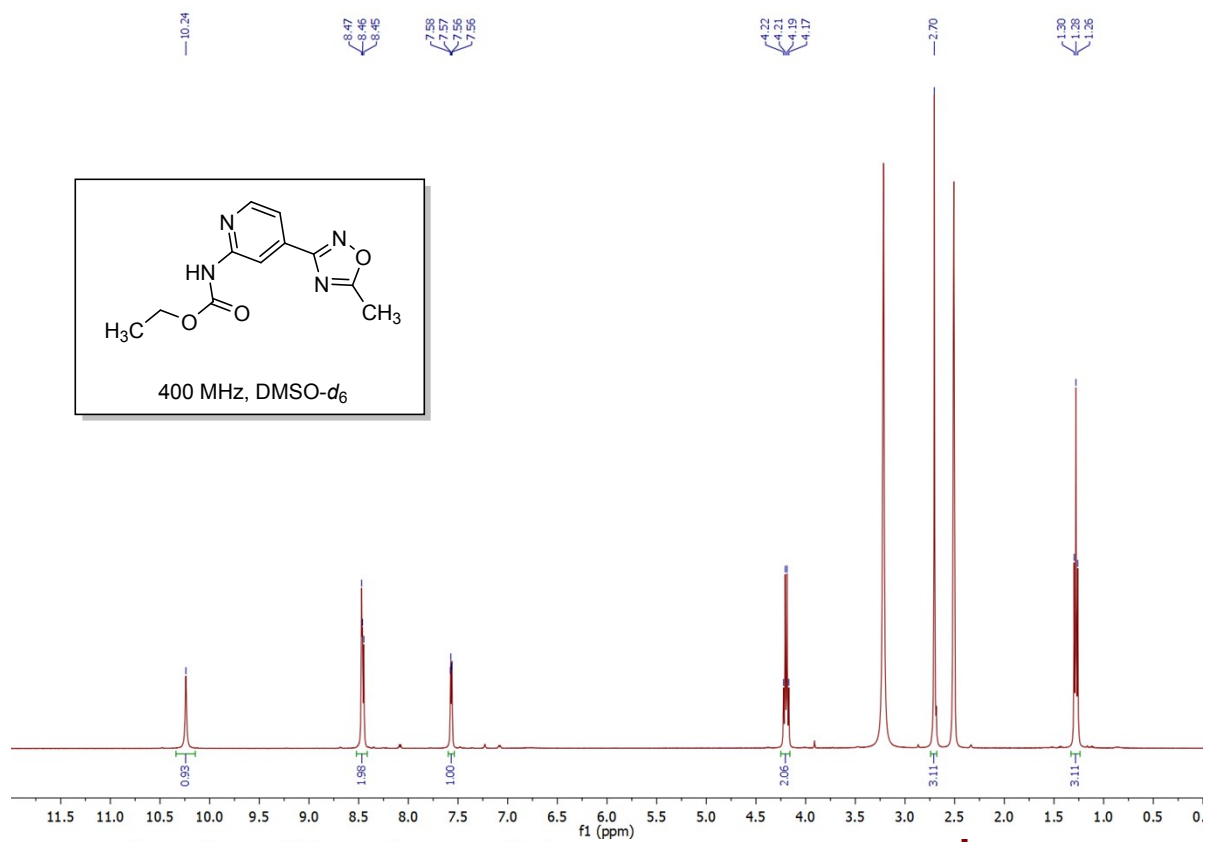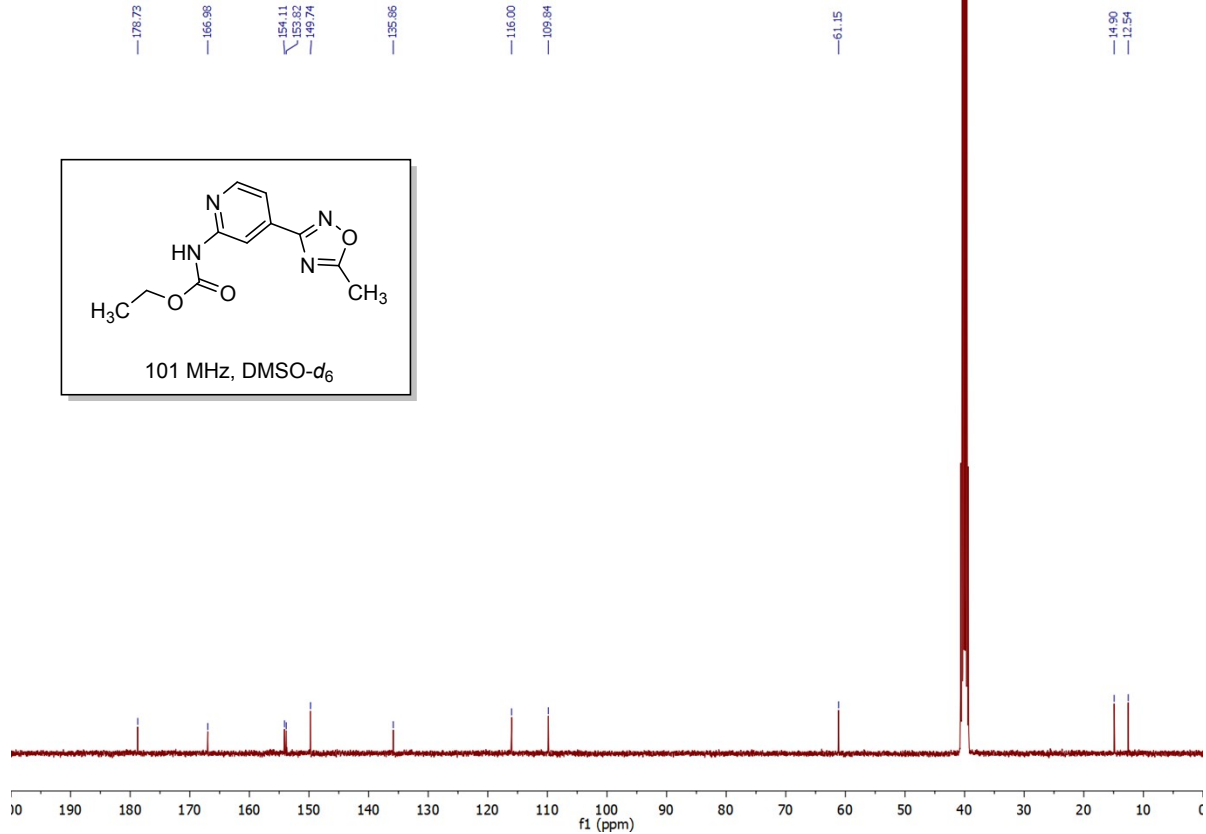

$^1\text{H}$  and  $^{13}\text{C}$  spectra of methyl 2-((ethoxycarbonyl)amino)isonicotinate **2t** and ethyl 2-((ethoxycarbonyl)amino)isonicotinate **2t'**.

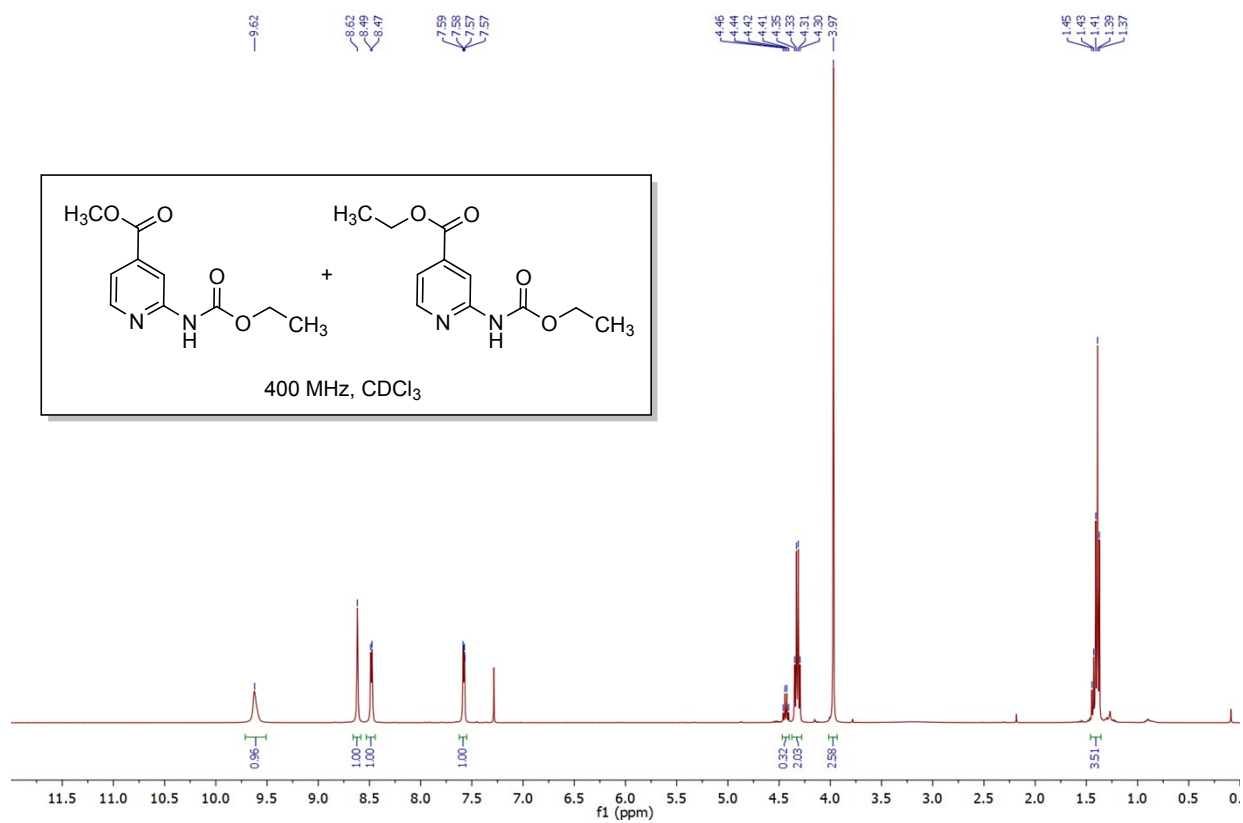

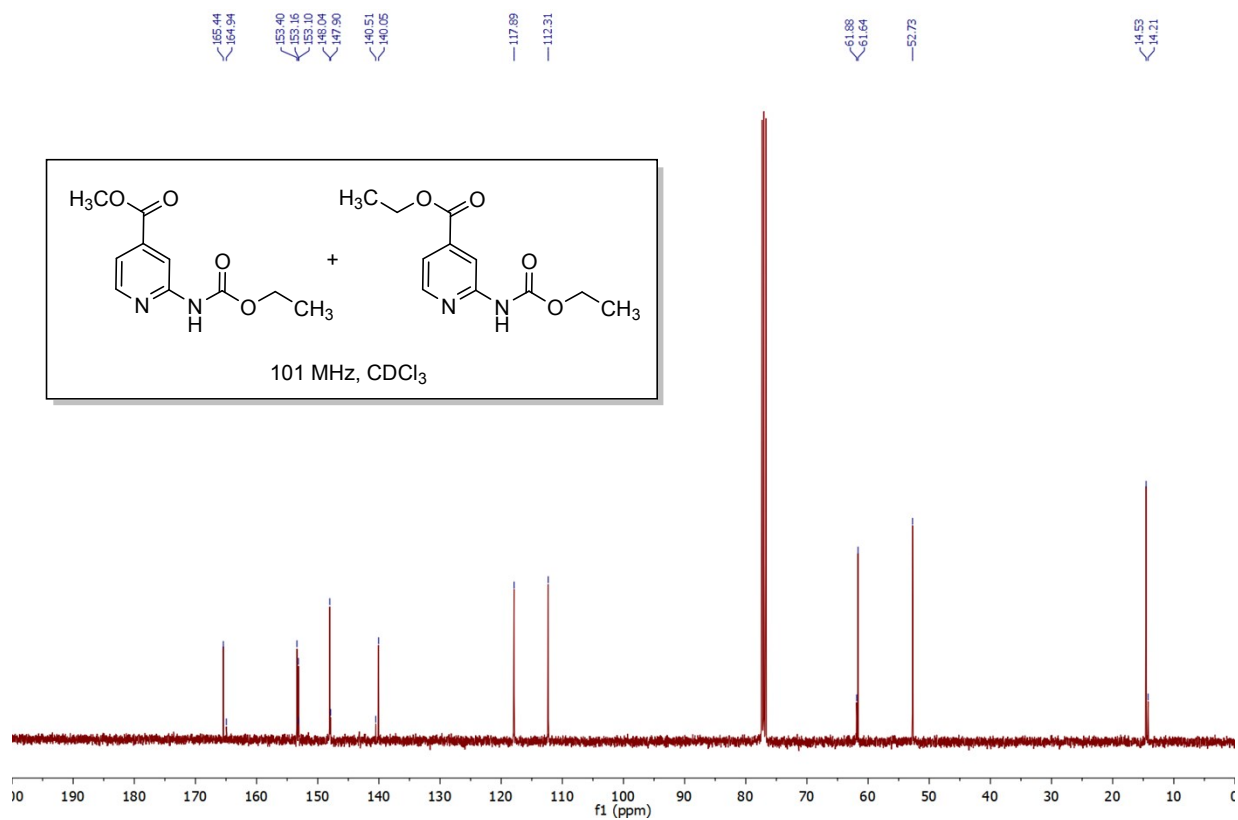

$^1\text{H}$  and  $^{13}\text{C}$  spectra of ethyl (6-methylpyridin-2-yl)carbamate **2u**.

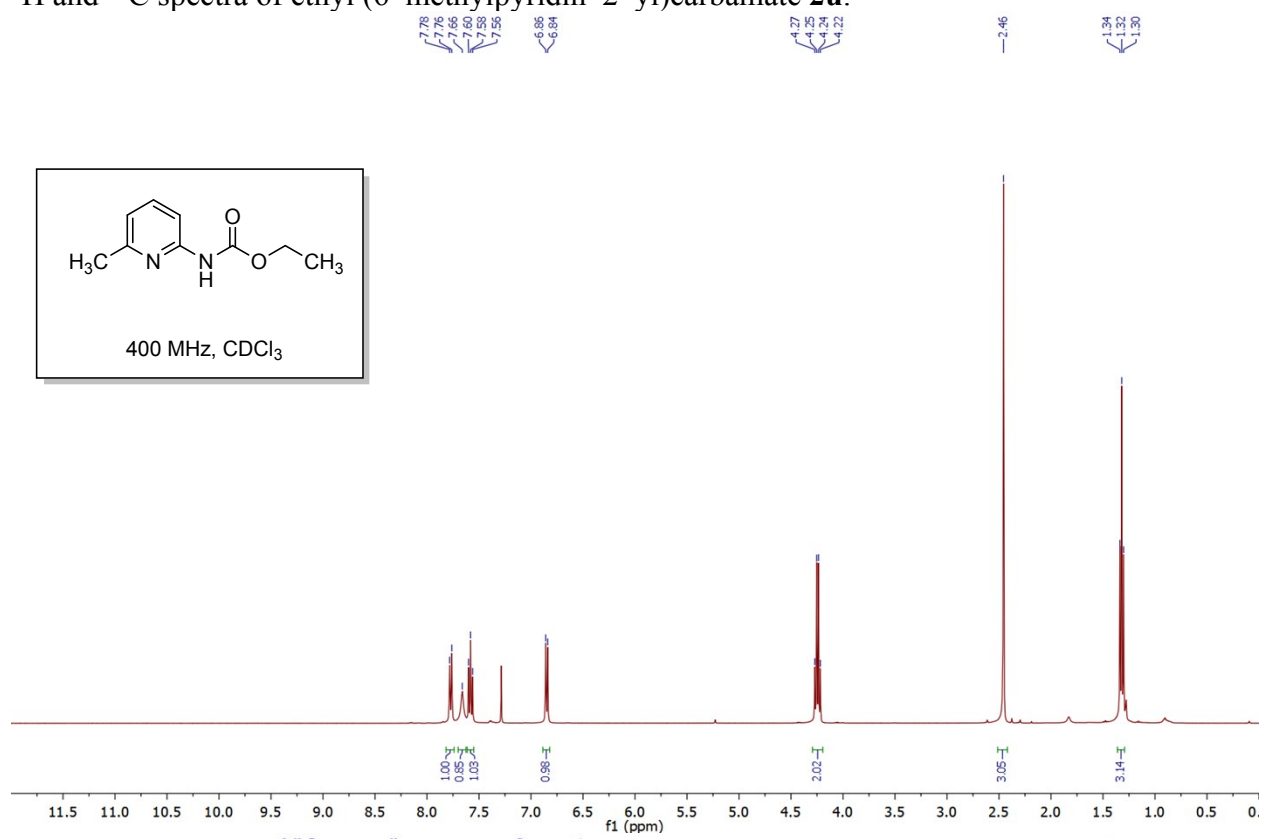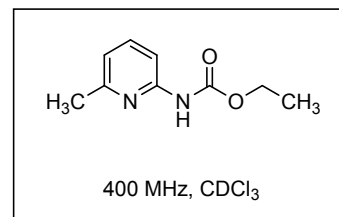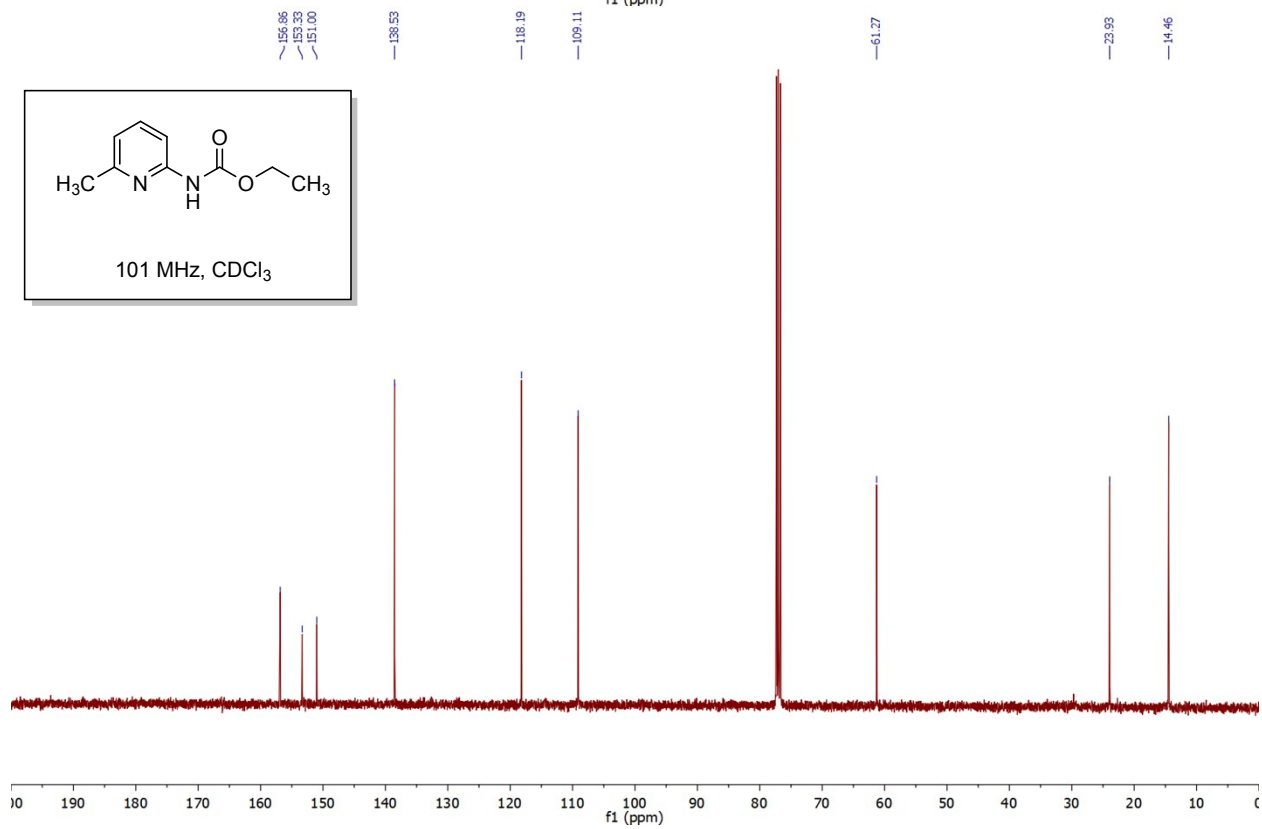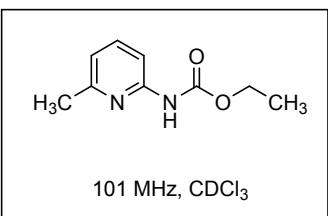

$^1\text{H}$  and  $^{13}\text{C}$  spectra of ethyl (6-cyanopyridin-2-yl)carbamate **2v**.

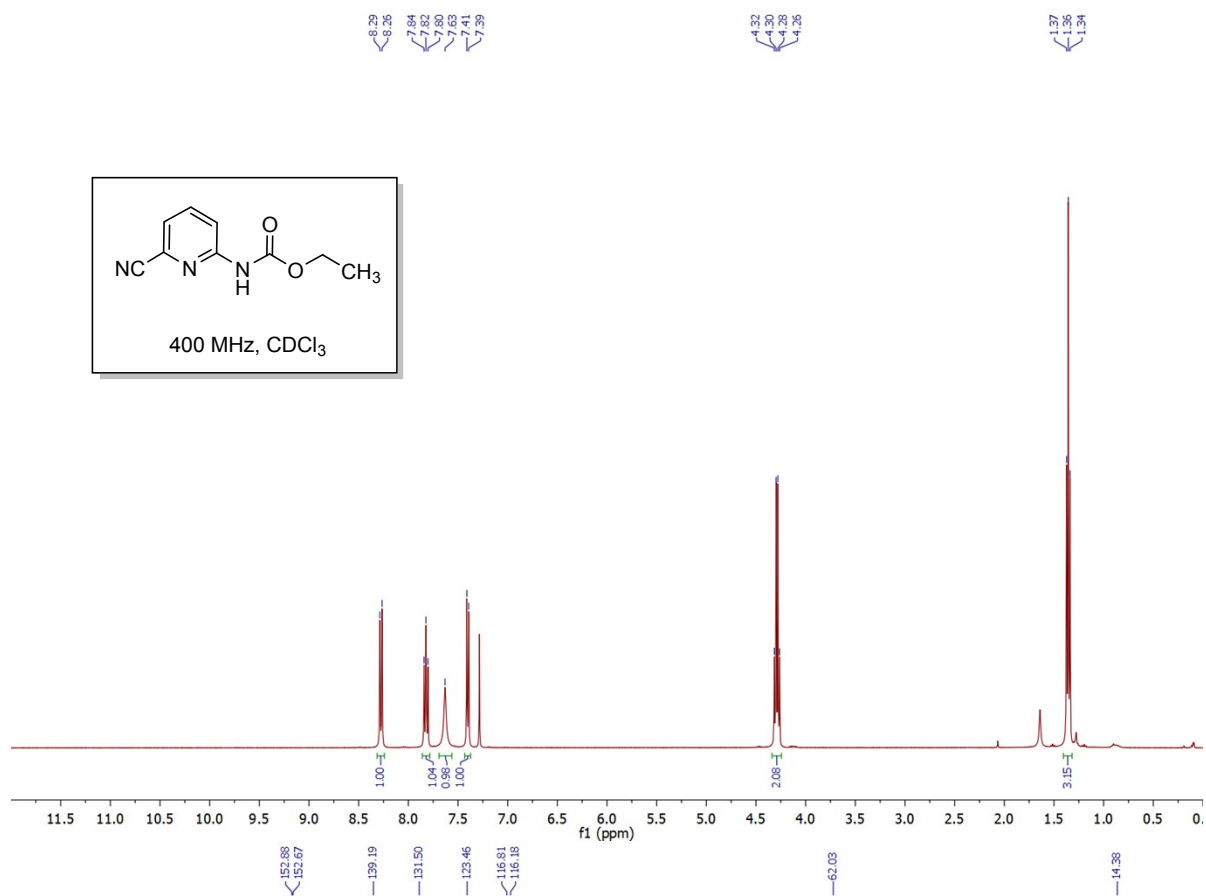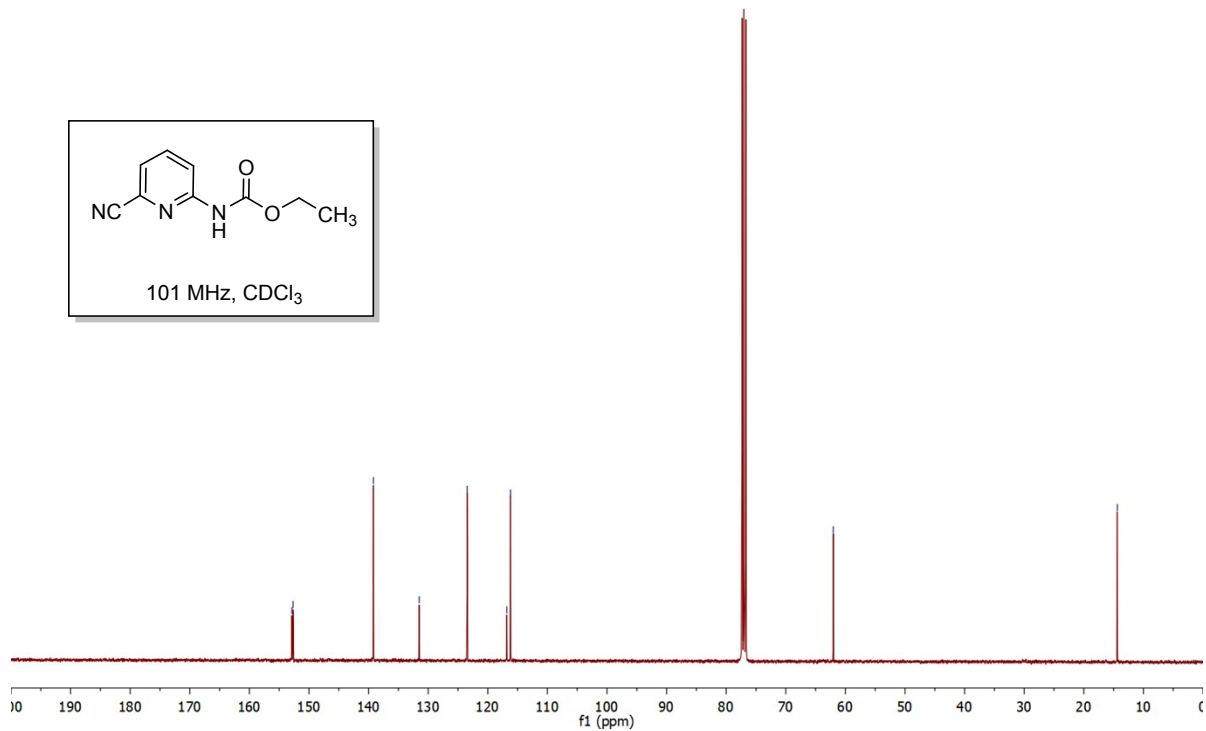

$^1\text{H}$  and  $^{13}\text{C}$  spectra ethyl (6-chloropyridin-2-yl)carbamate **2w**.

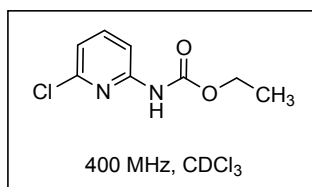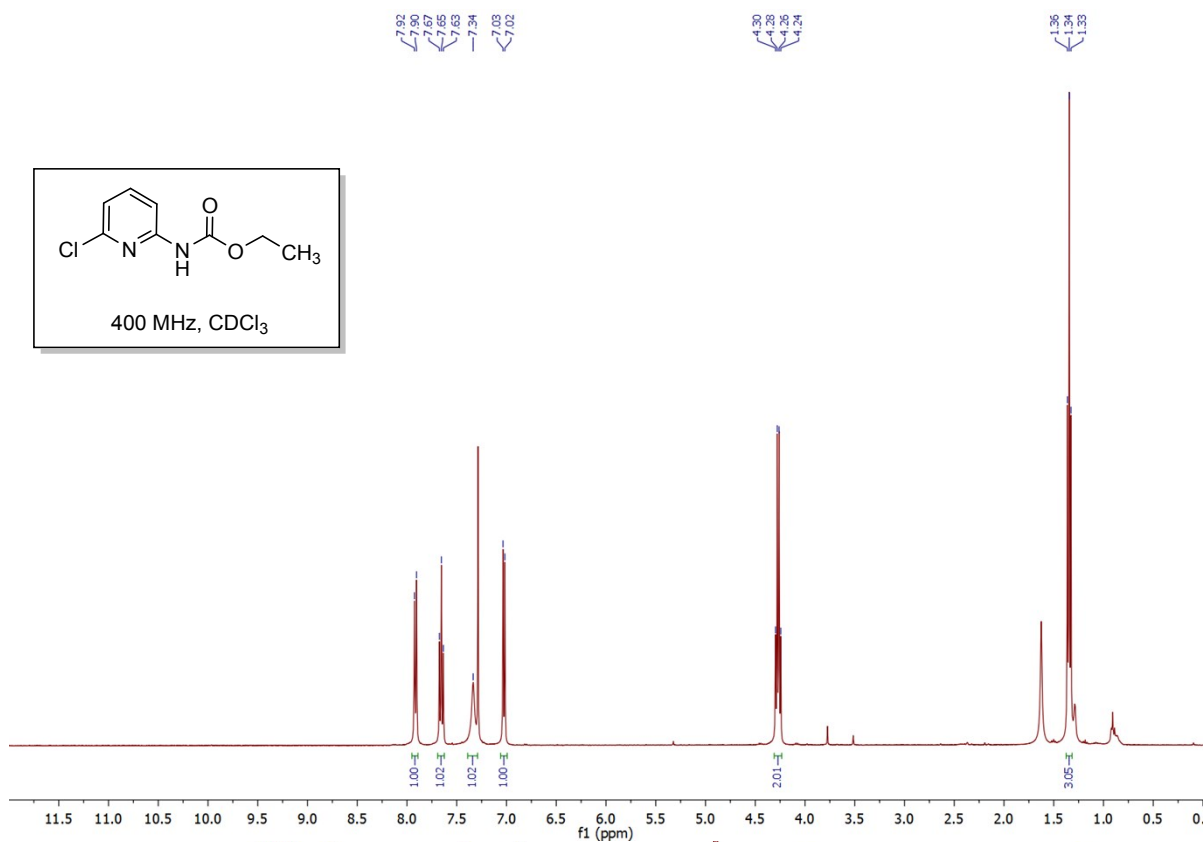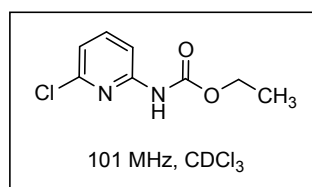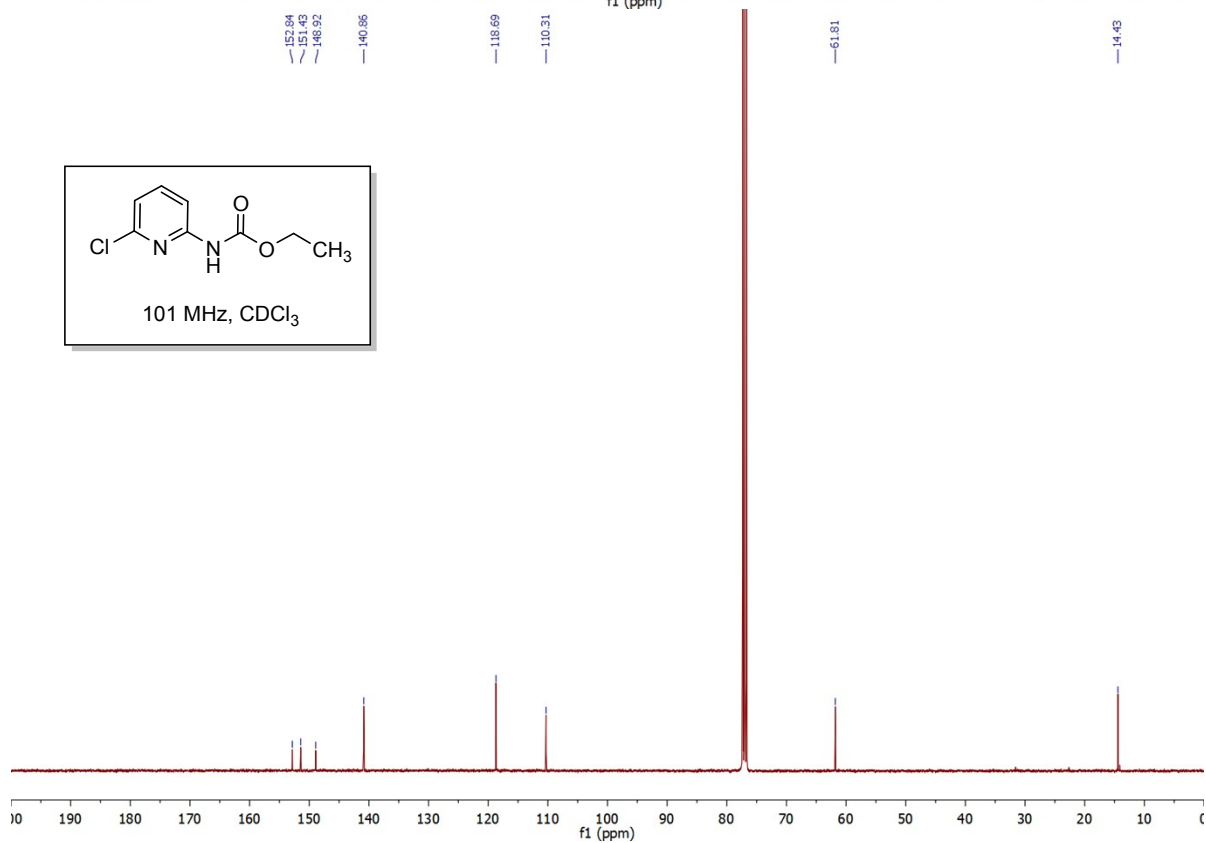

$^1\text{H}$  and  $^{13}\text{C}$  spectra of ethyl (6-phenylpyridin-2-yl)carbamate **2x**.

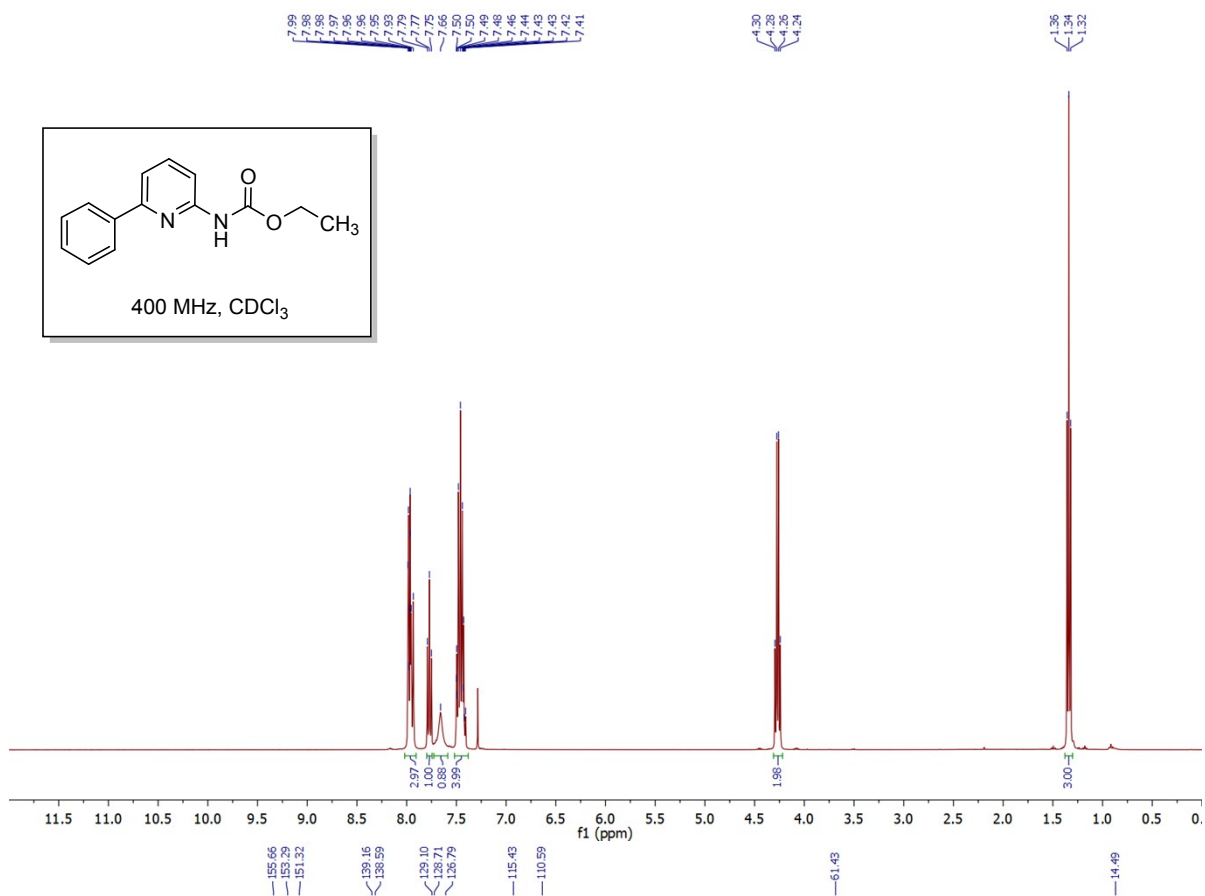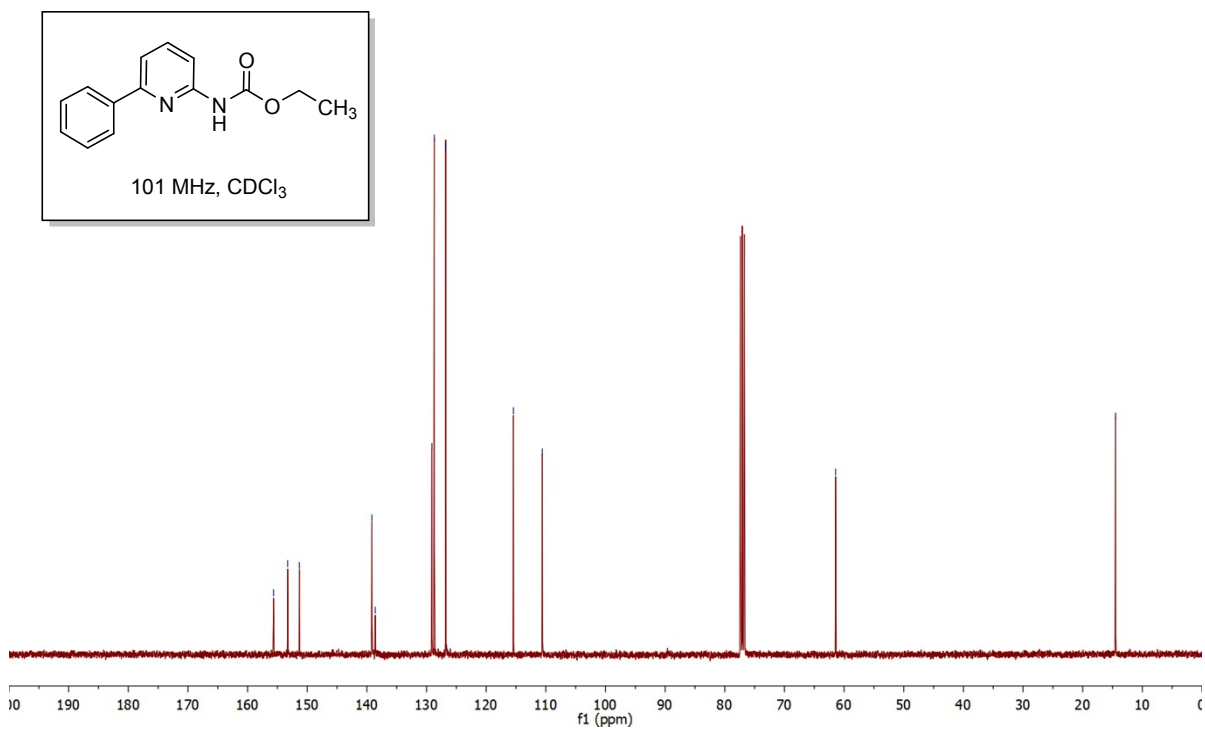



$^1\text{H}$  and  $^{13}\text{C}$  spectra of ethyl (3,5-dimethylpyridin-2-yl)carbamate **2y**.

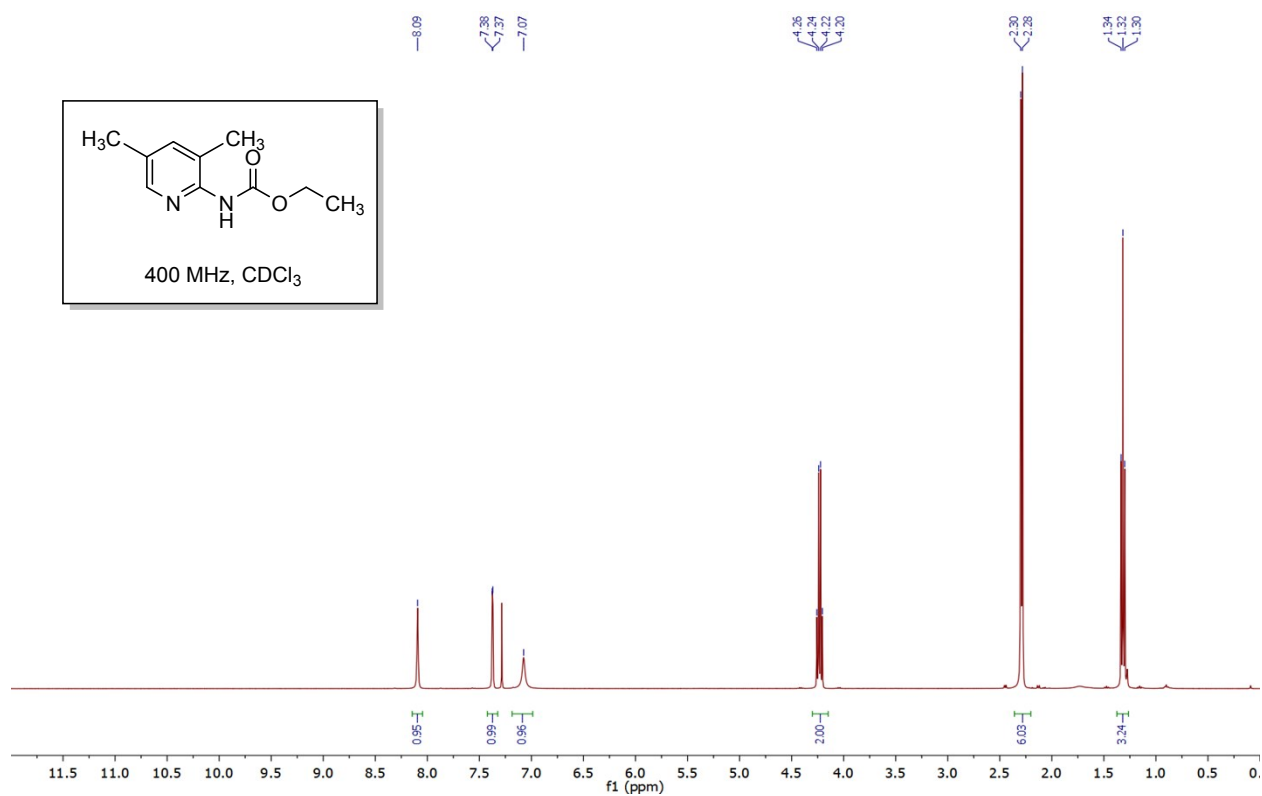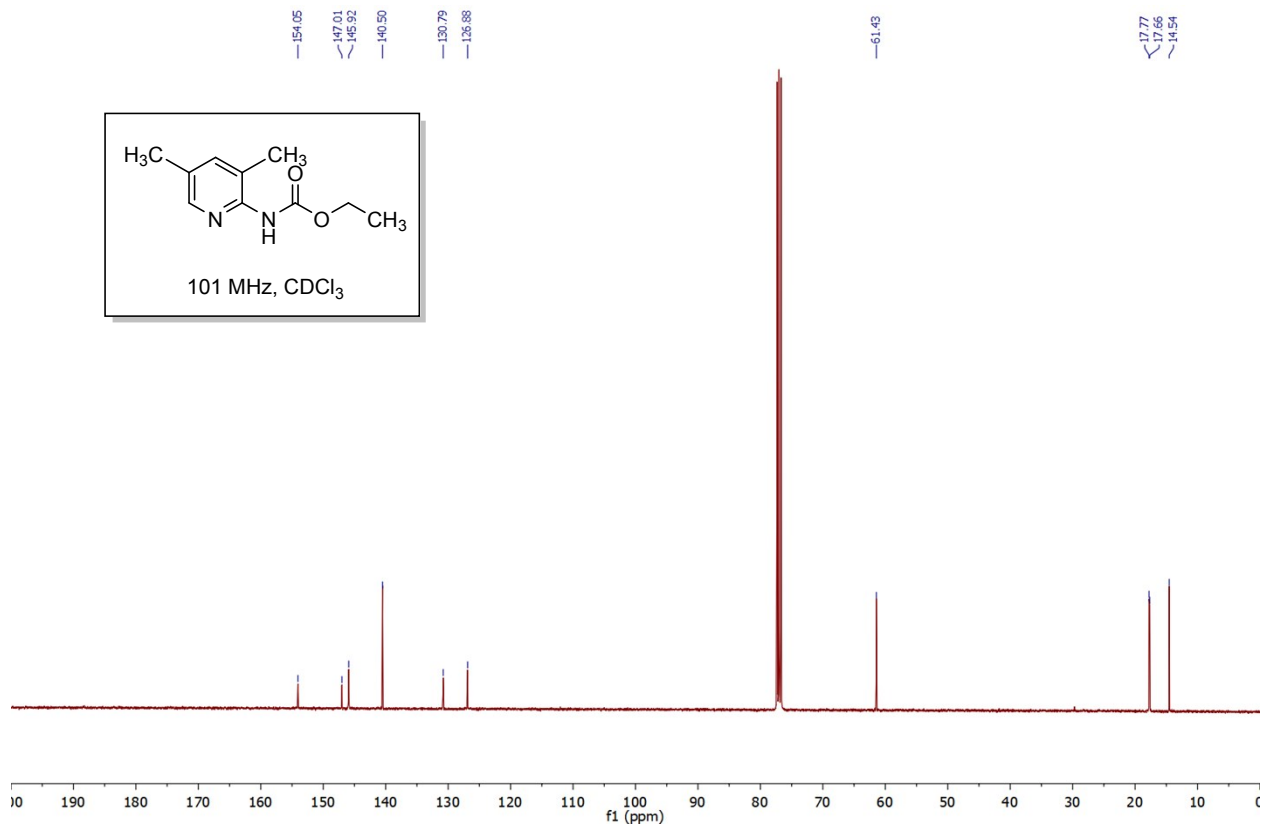

$^1\text{H}$  and  $^{13}\text{C}$  spectra of ethyl quinolin-2-ylcarbamate **3a**.

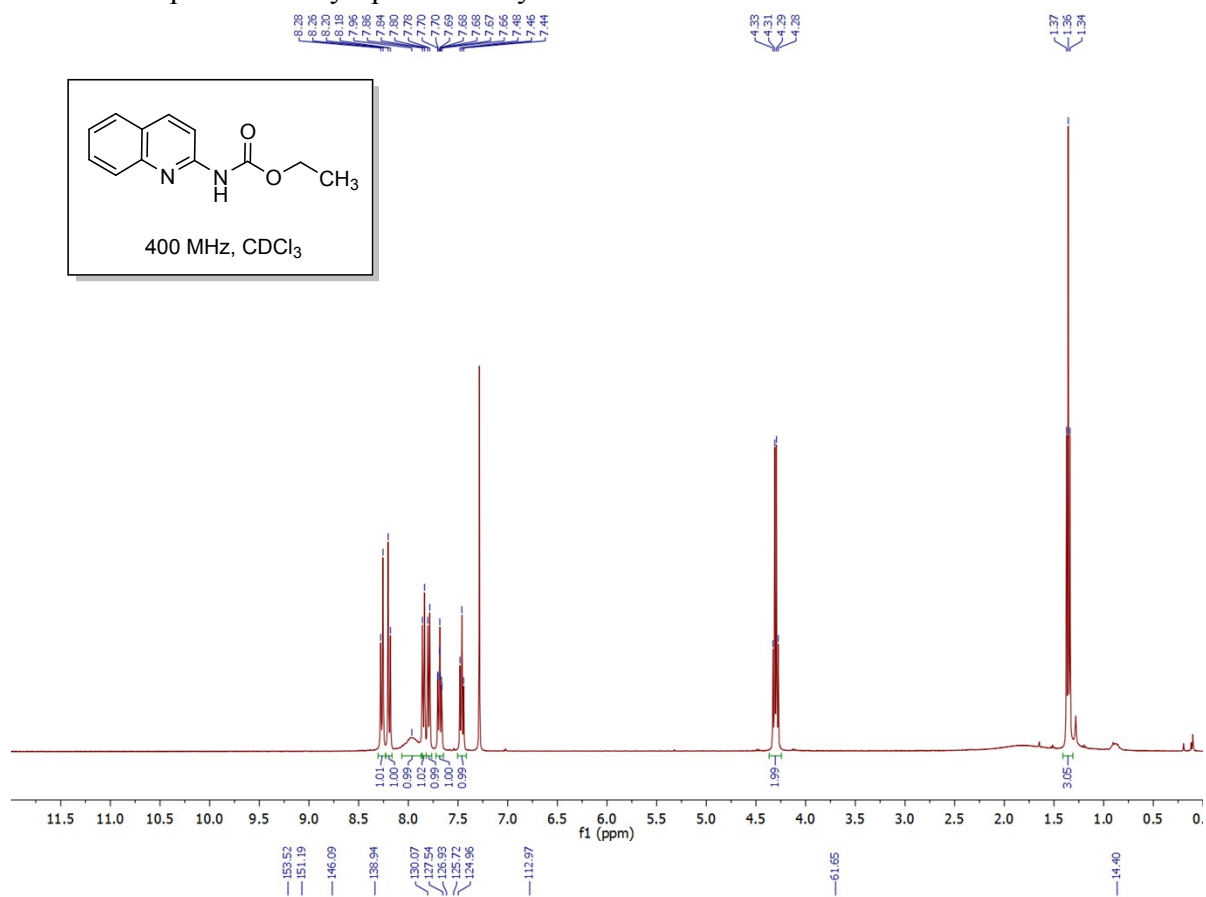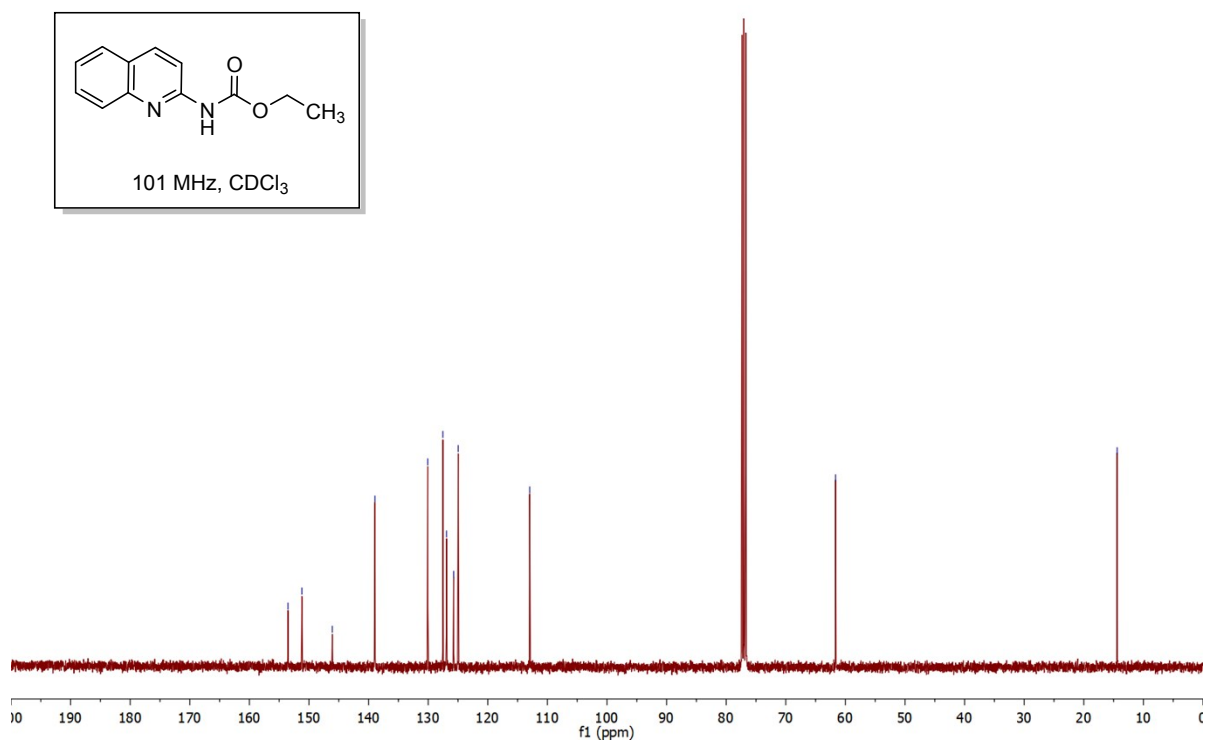

$^1\text{H}$  and  $^{13}\text{C}$  spectra of ethyl (4-methoxyquinolin-2-yl)carbamate **3b**.

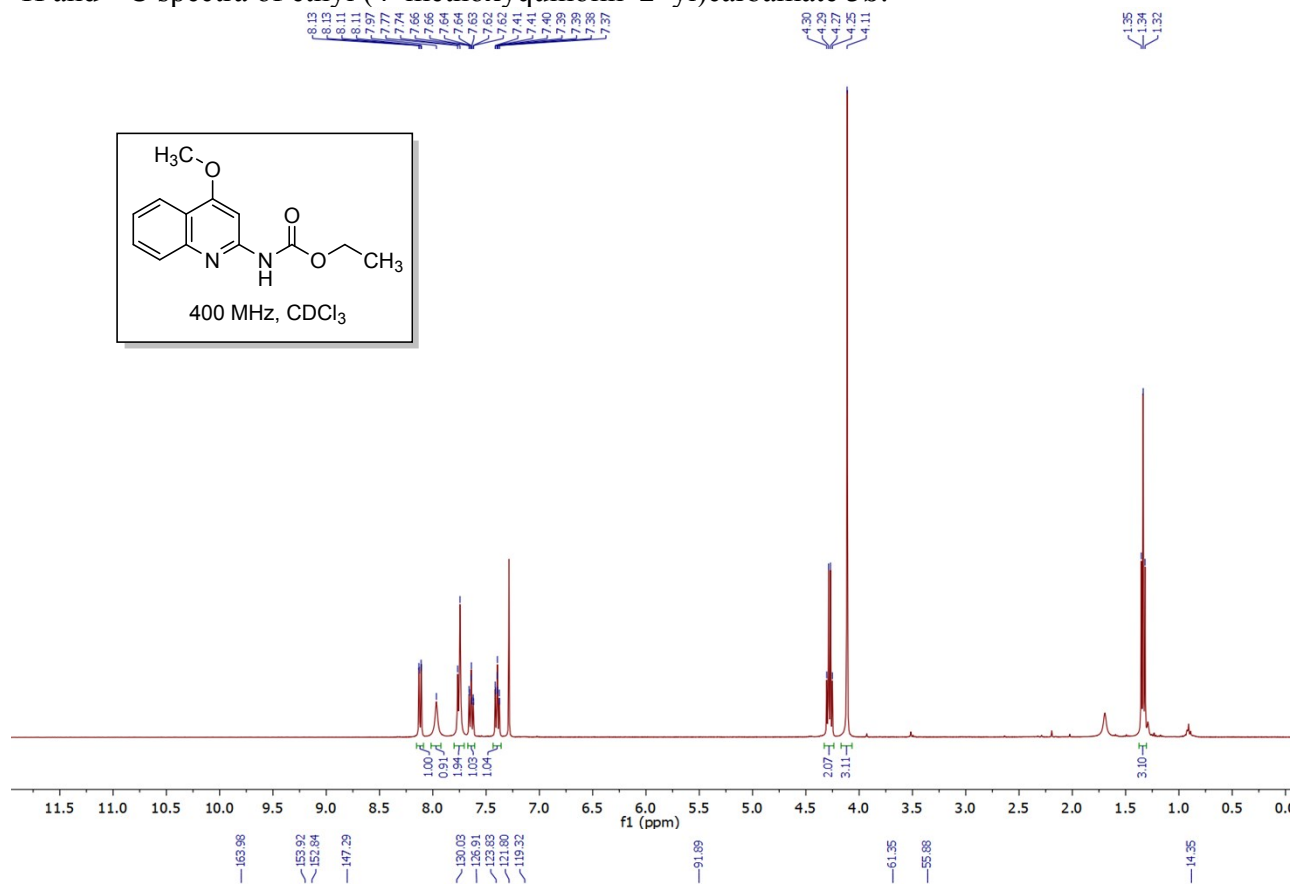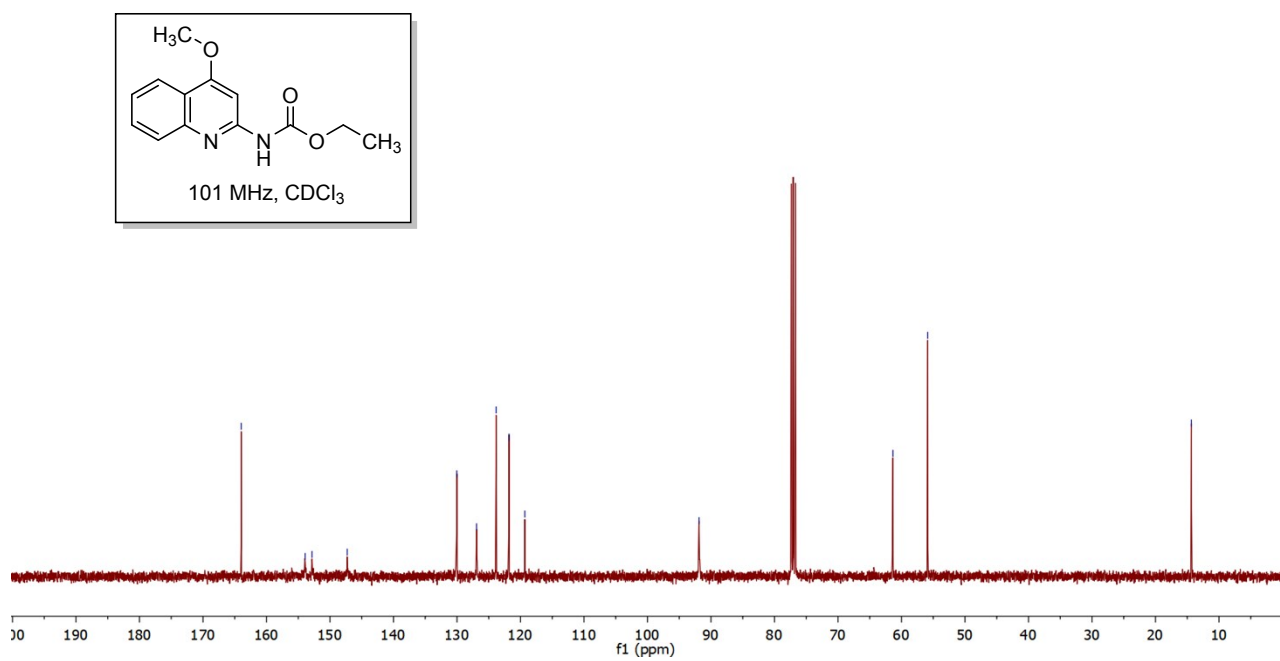



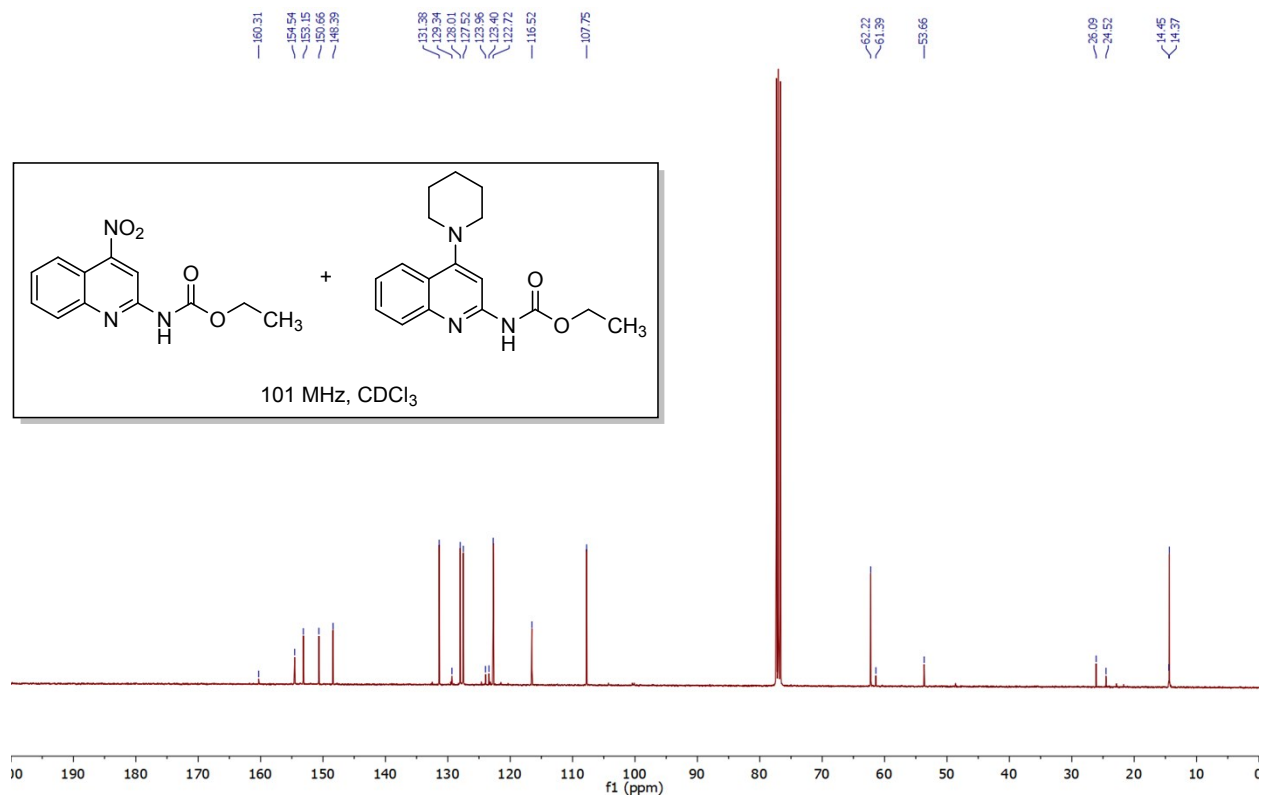

$^1\text{H}$  and  $^{13}\text{C}$  spectra of ethyl benzo[*h*]quinolin-2-ylcarbamate **3e**.

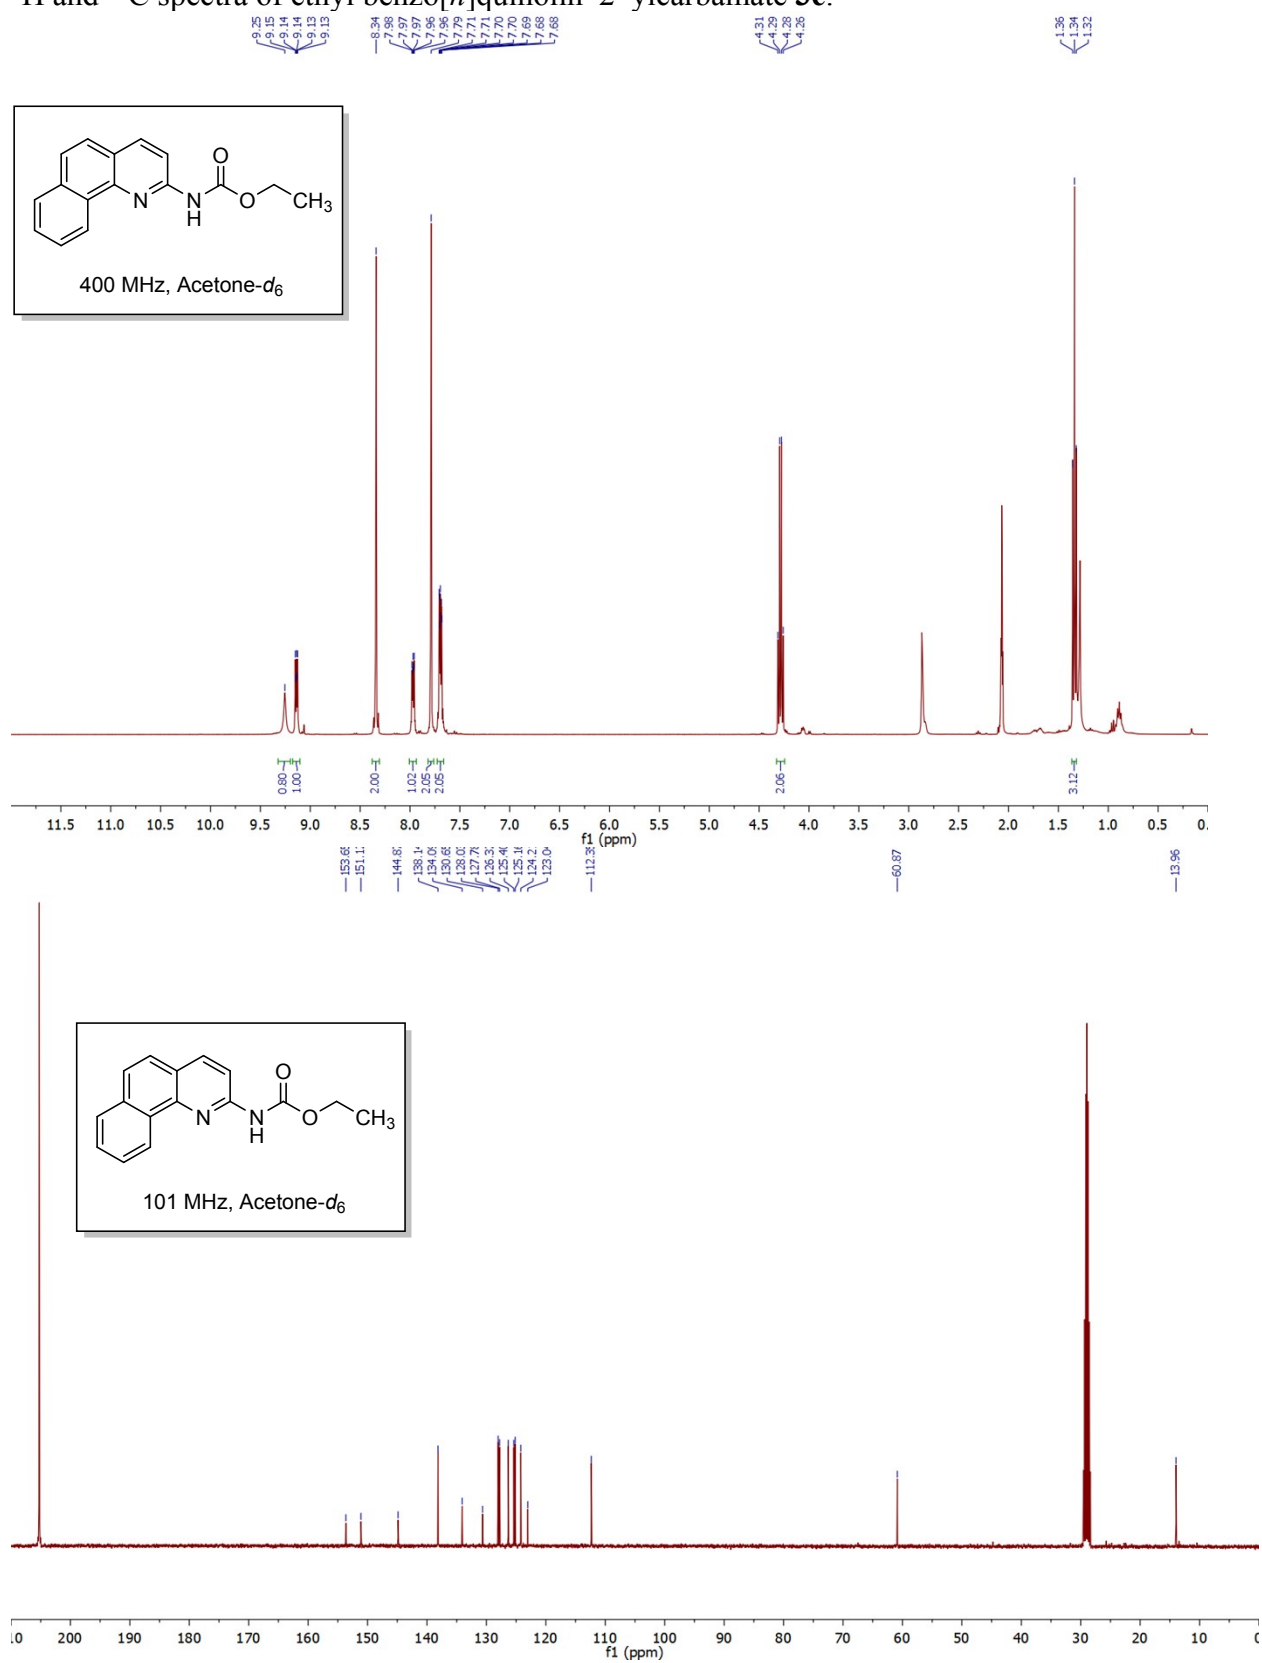

$^1\text{H}$  and  $^{13}\text{C}$  spectra of benzyl quinolin-2-ylcarbamate **3f**.

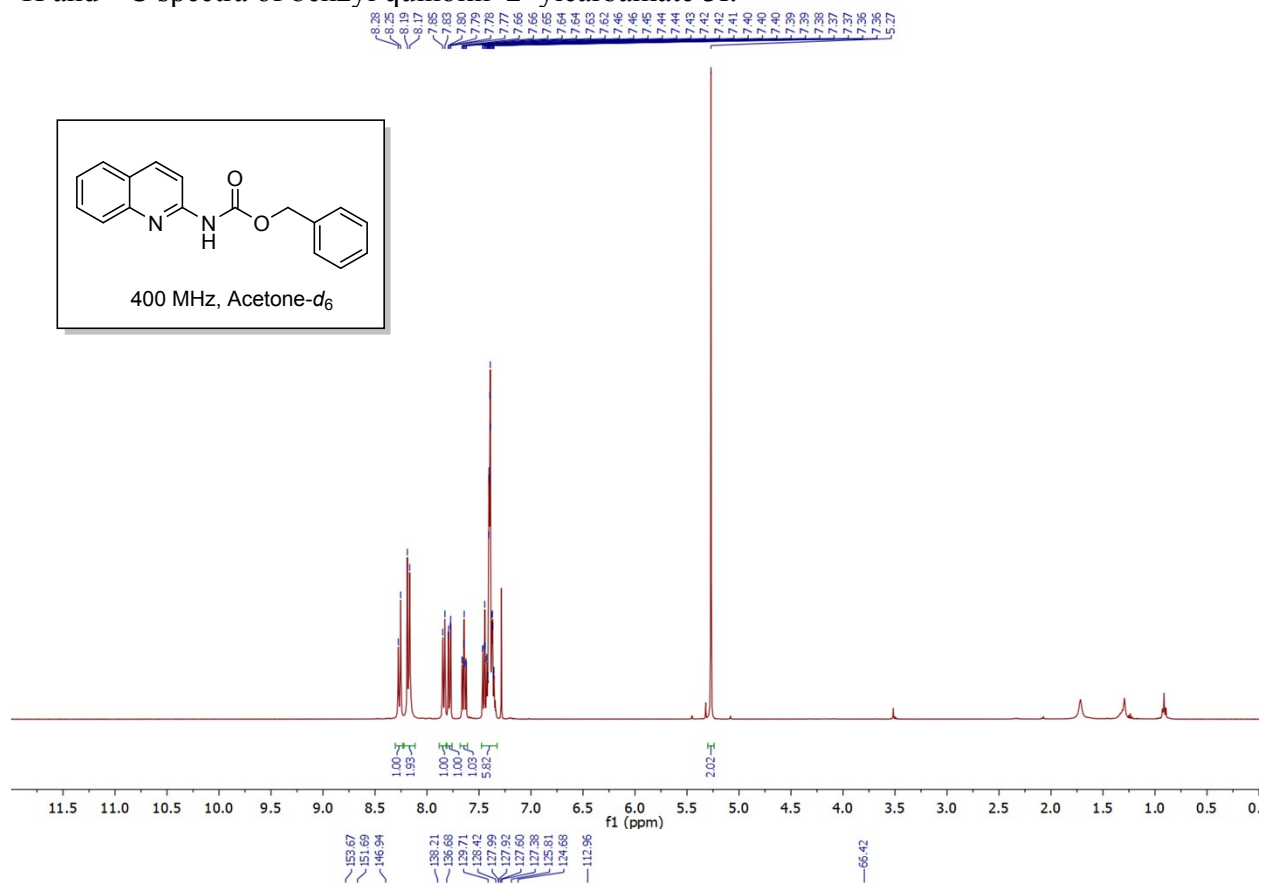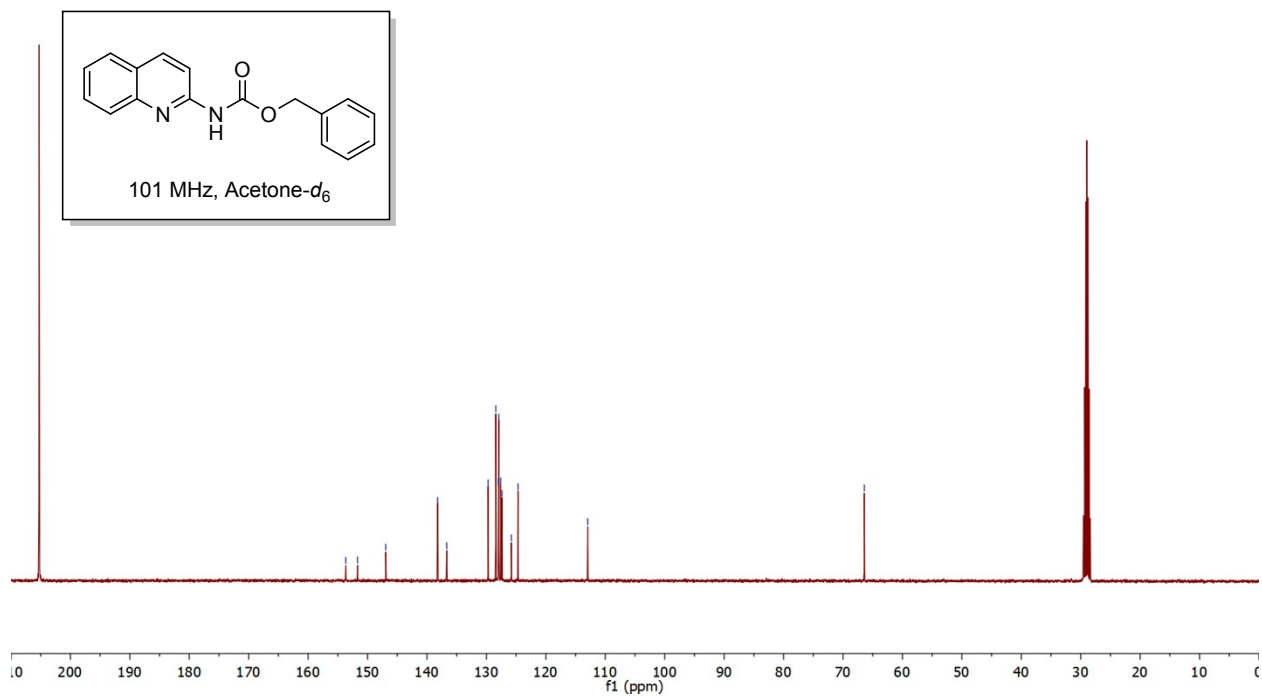

$^1\text{H}$  and  $^{13}\text{C}$  spectra of isopropyl quinolin-2-ylcarbamate **3g**.

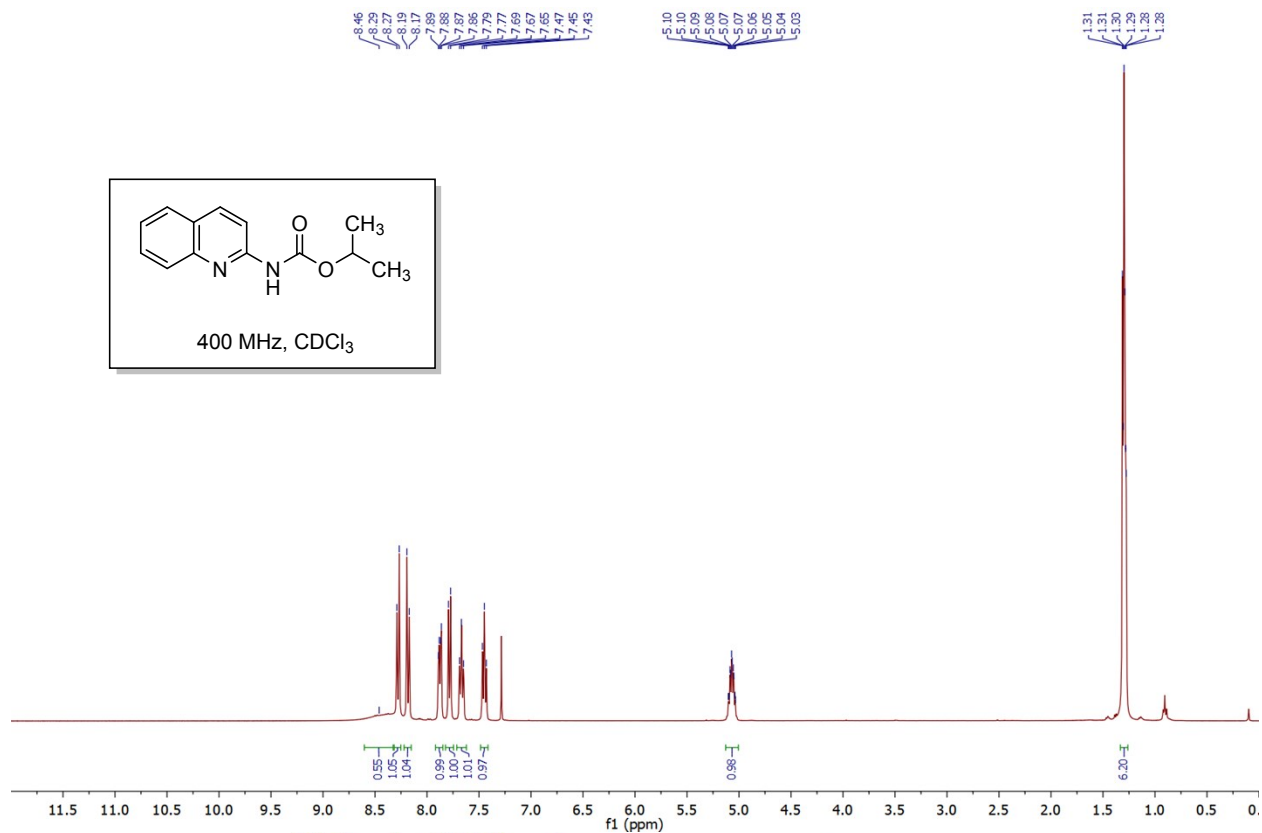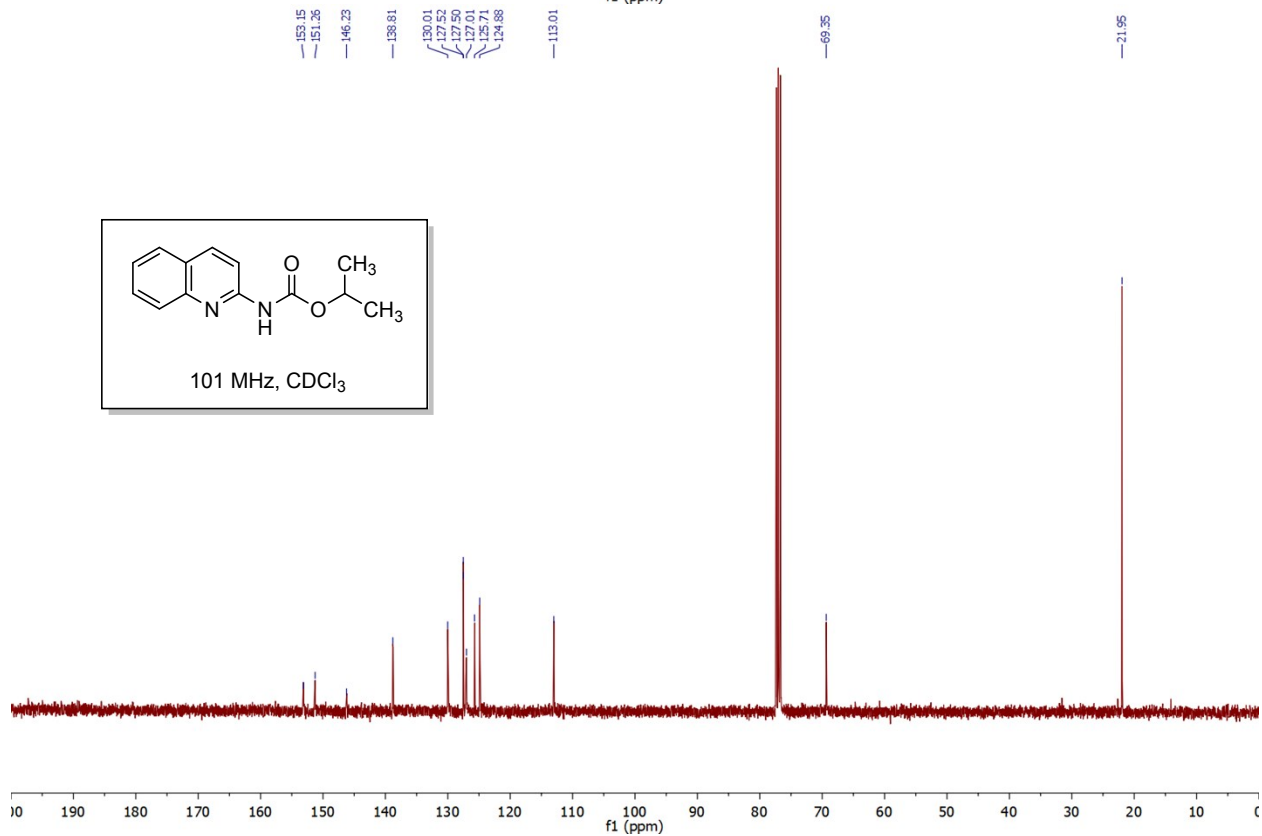



<sup>1</sup>H and <sup>13</sup>C spectra of 2-methoxyethyl quinolin-2-ylcarbamate **3h**.

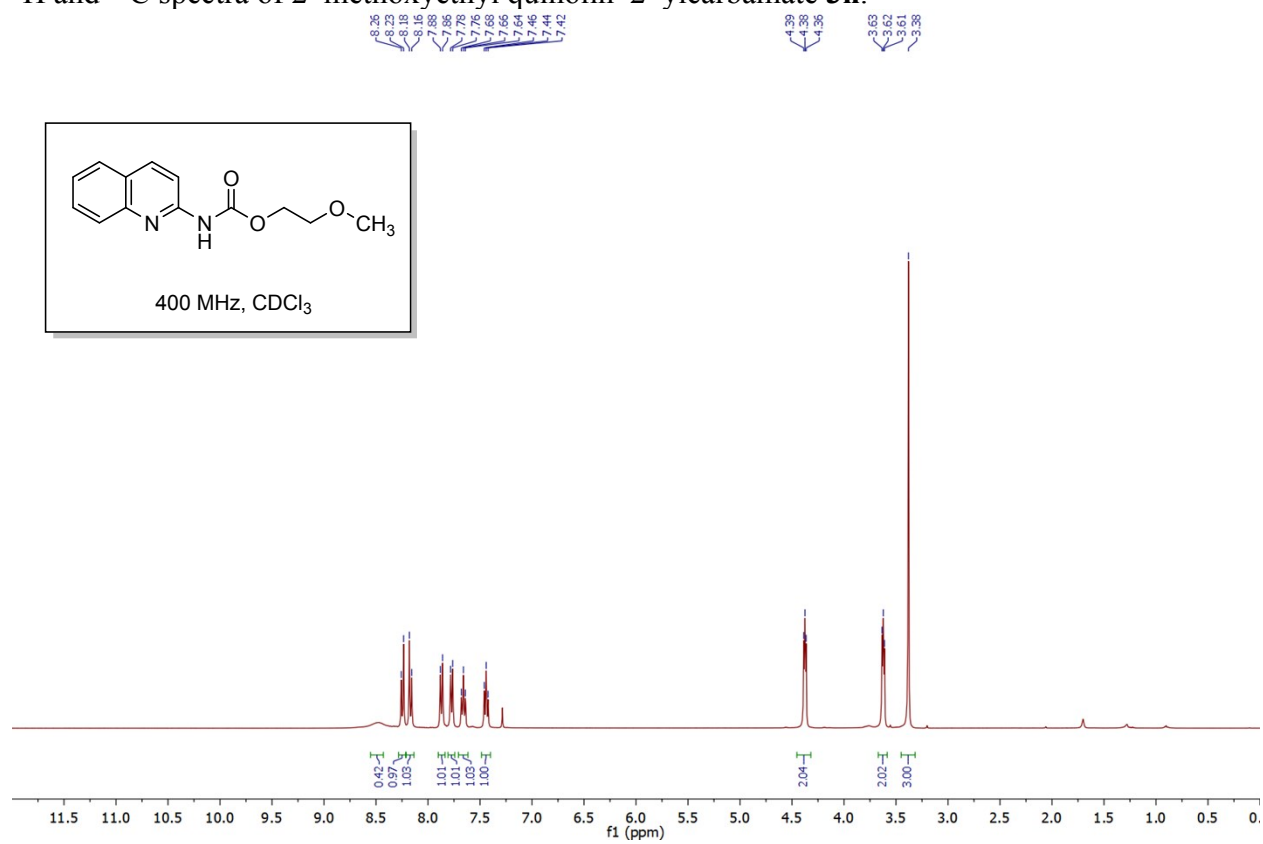

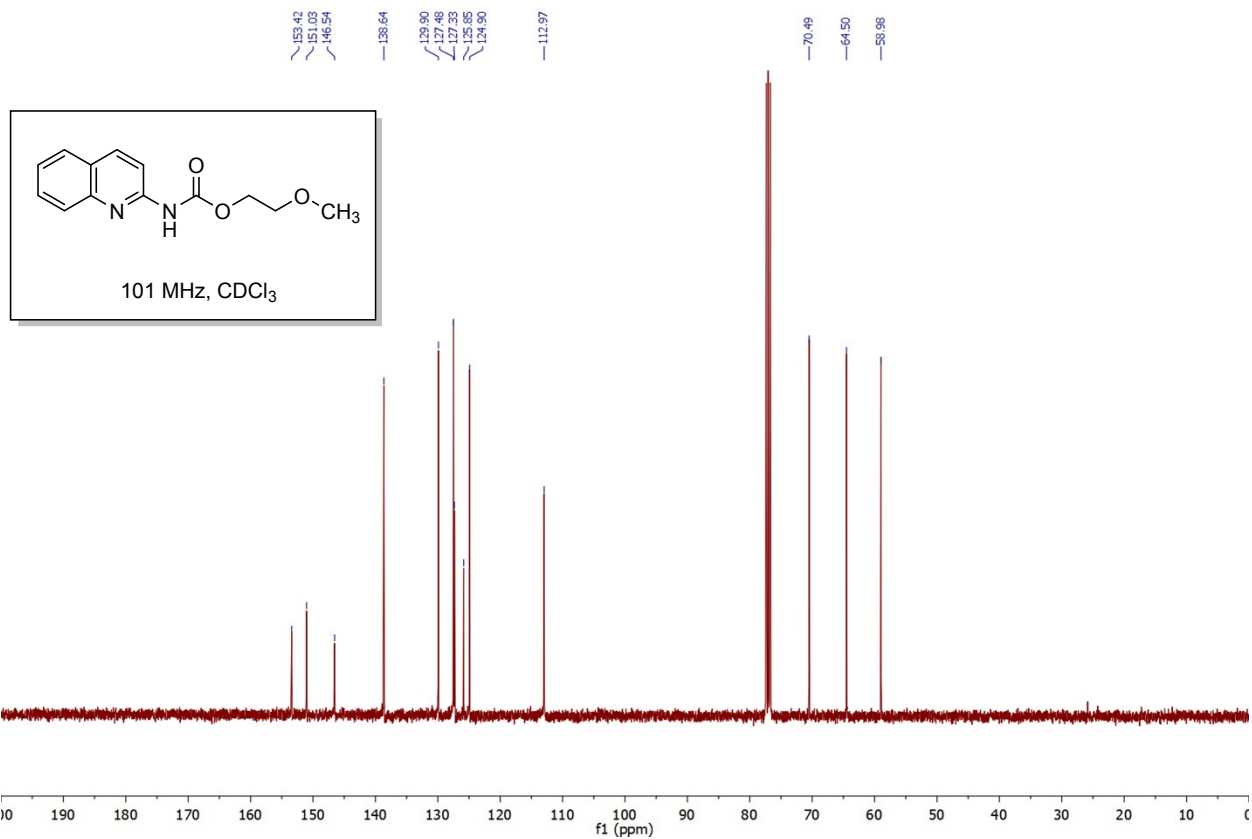

$^1\text{H}$  and  $^{13}\text{C}$  spectra of *tert*-butyl quinolin-2-ylcarbamate **3j**.

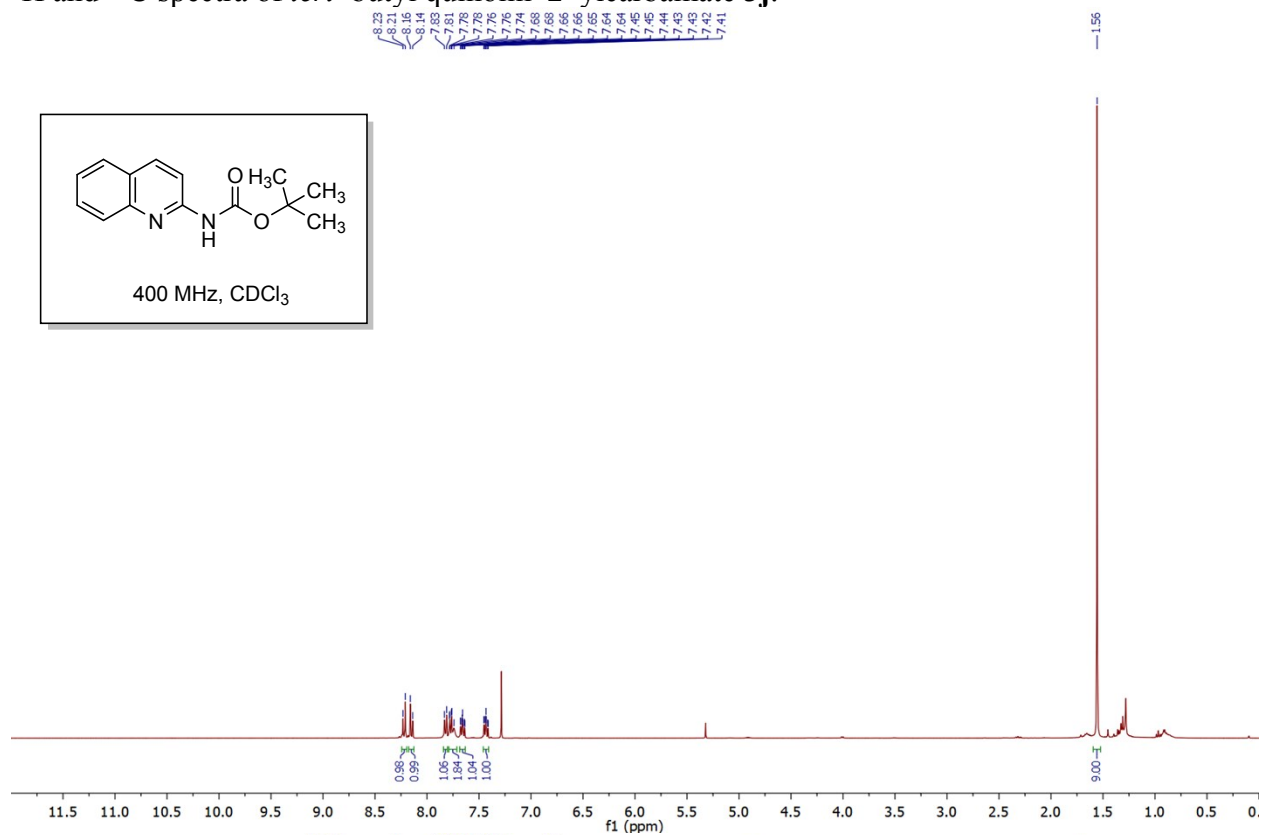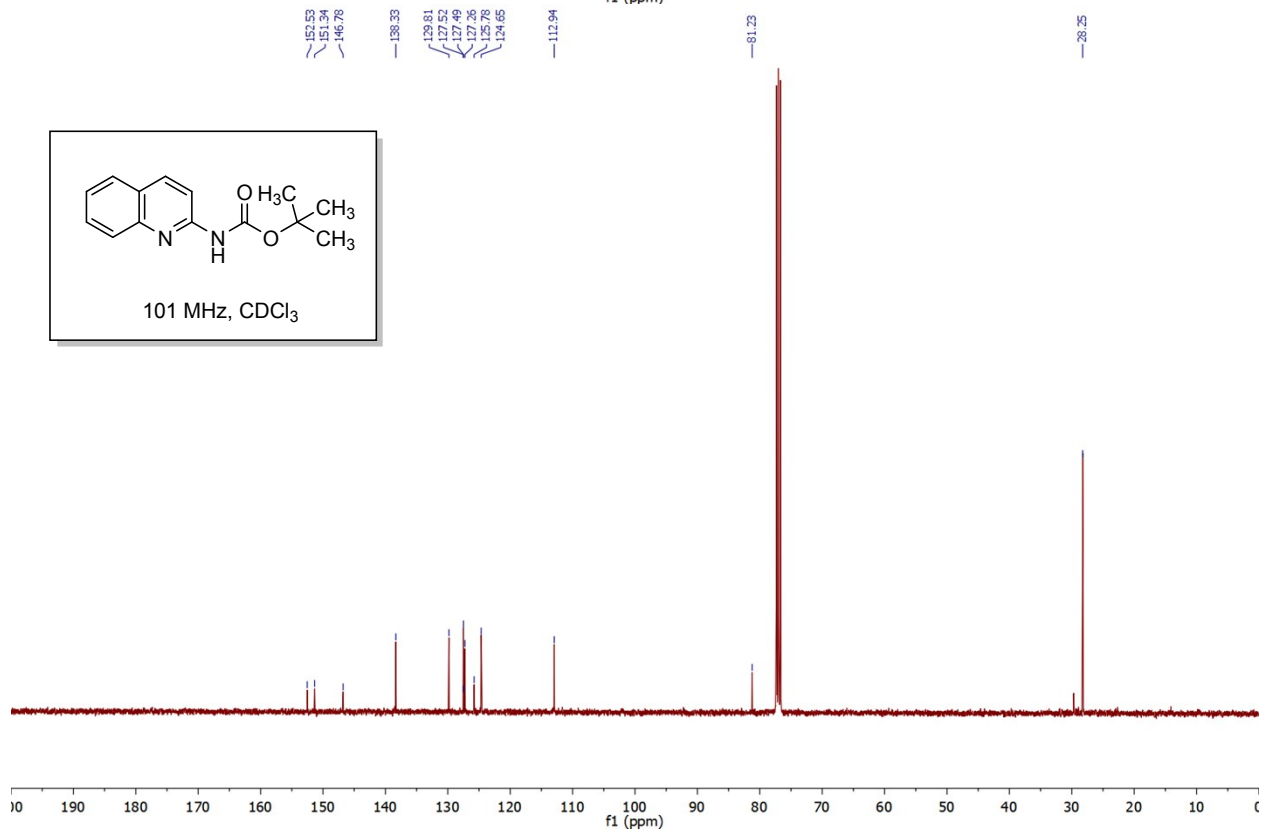

$^1\text{H}$  and  $^{13}\text{C}$  spectra of isopropyl isoquinolin-1-ylcarbamate **3k**

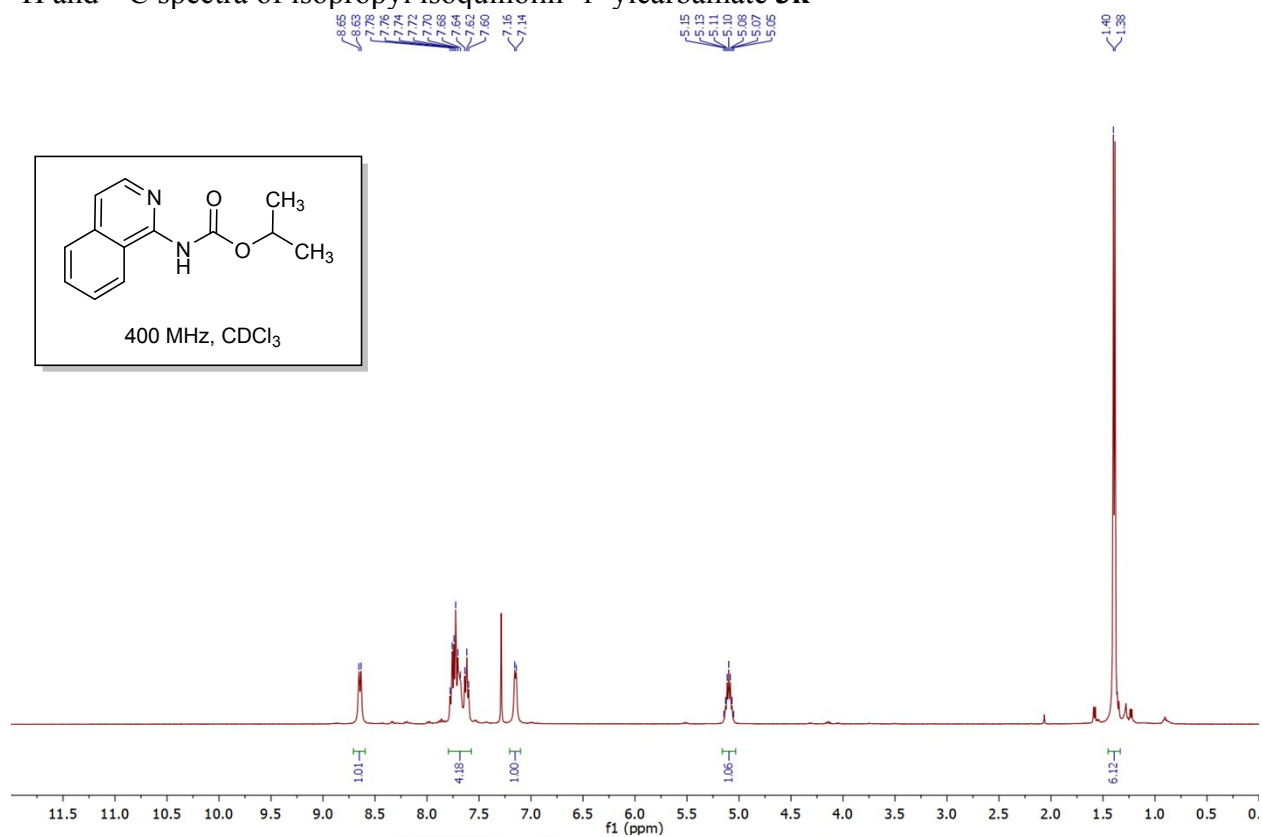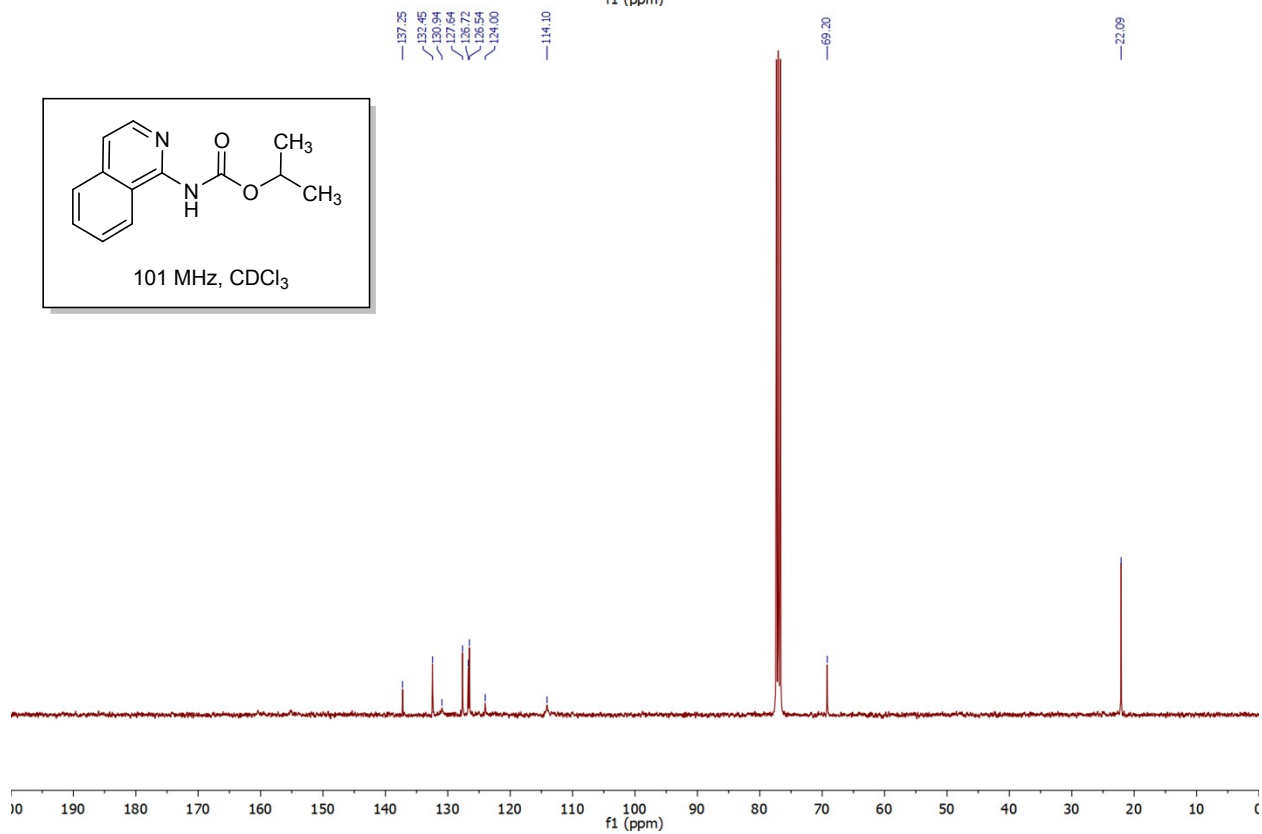

## 5. X-ray diffraction data

Sing crystals for X-ray studying were obtained by slow evaporation of solutions of corresponding carbamates in MeOH (**2a**), CDCl<sub>3</sub> (**2i** and **2k**), and 1,2-DCE (**3b** and **3h**) at RT in air. X-ray diffraction data were collected at a Rigaku SuperNova (compounds **2a**, **2i**, **3b**) and at a Rigaku XtaLAB Synergy-S (compounds **2k** and **3h**) diffractometers using Cu-K $\alpha$  ( $\lambda = 0.154184$  nm) radiation. The structures have been solved with the ShelXT<sup>14</sup> structure solution program using Intrinsic Phasing and refined with the ShelXL<sup>15</sup> refinement package incorporated in the OLEX2 program package<sup>16</sup> using Least Squares minimization. Empirical absorption correction was applied in CrysAlisPro<sup>17</sup> program complex using spherical harmonics, implemented in SCALE3 ABSPACK scaling algorithm. Supplementary crystallographic data for this paper have been deposited at Cambridge Crystallographic Data Centre and can be obtained free of charge via [www.ccdc.cam.ac.uk/data\\_request/cif](http://www.ccdc.cam.ac.uk/data_request/cif). CCDC numbers 2050683 (**2a**), 2050680 (**2i**), 2050682 (**2k**), 2050687 (**3b**), 2050685 (**3h**).

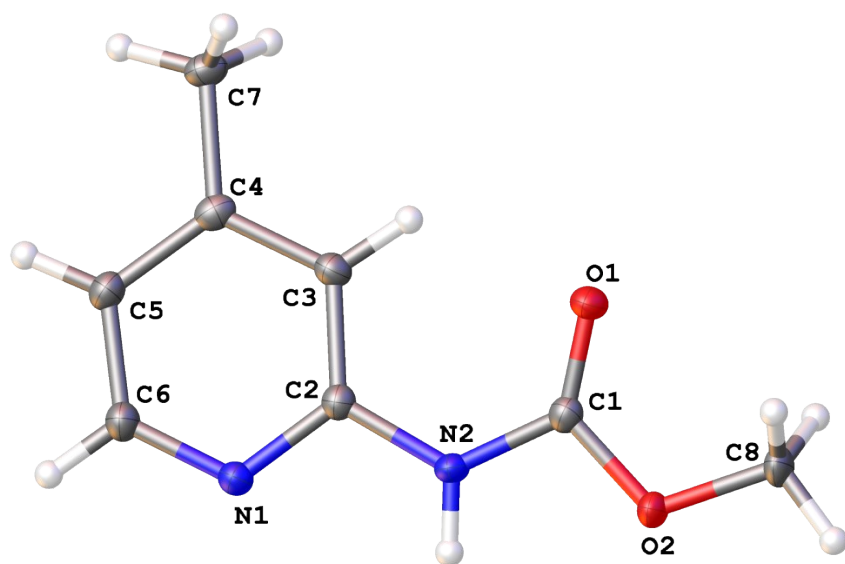

**Figure S1.** View of the molecular structure of **2a**. Thermal ellipsoids are drawn at the 50% probability level.

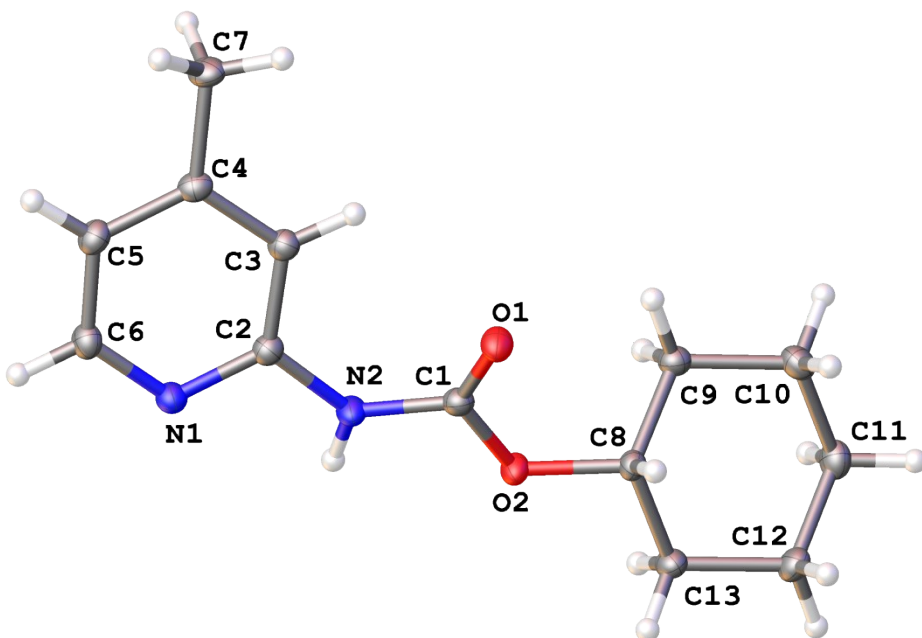

**Figure S2.** View of the molecular structure of **2i**. Thermal ellipsoids are drawn at the 50% probability level.

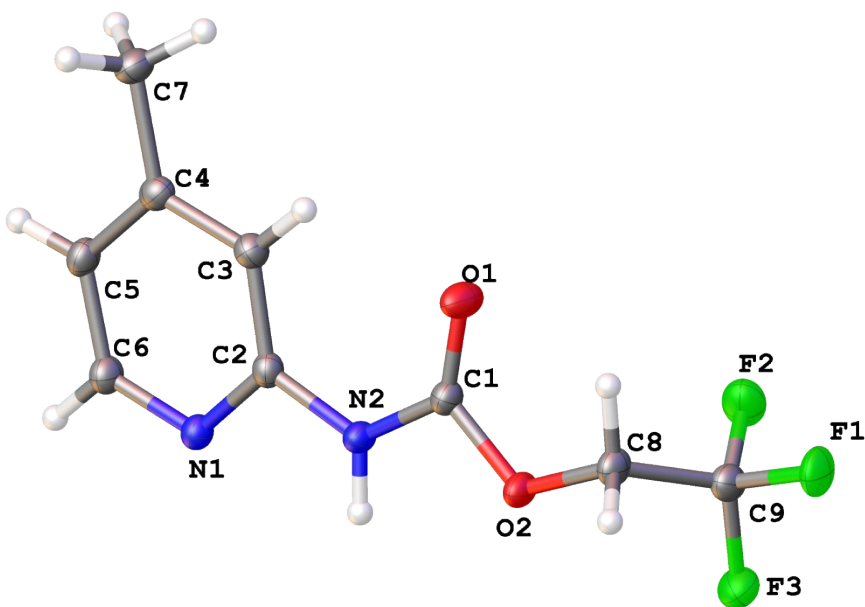

**Figure S3.** View of the molecular structure of **2k**. Thermal ellipsoids are drawn at the 50% probability level.

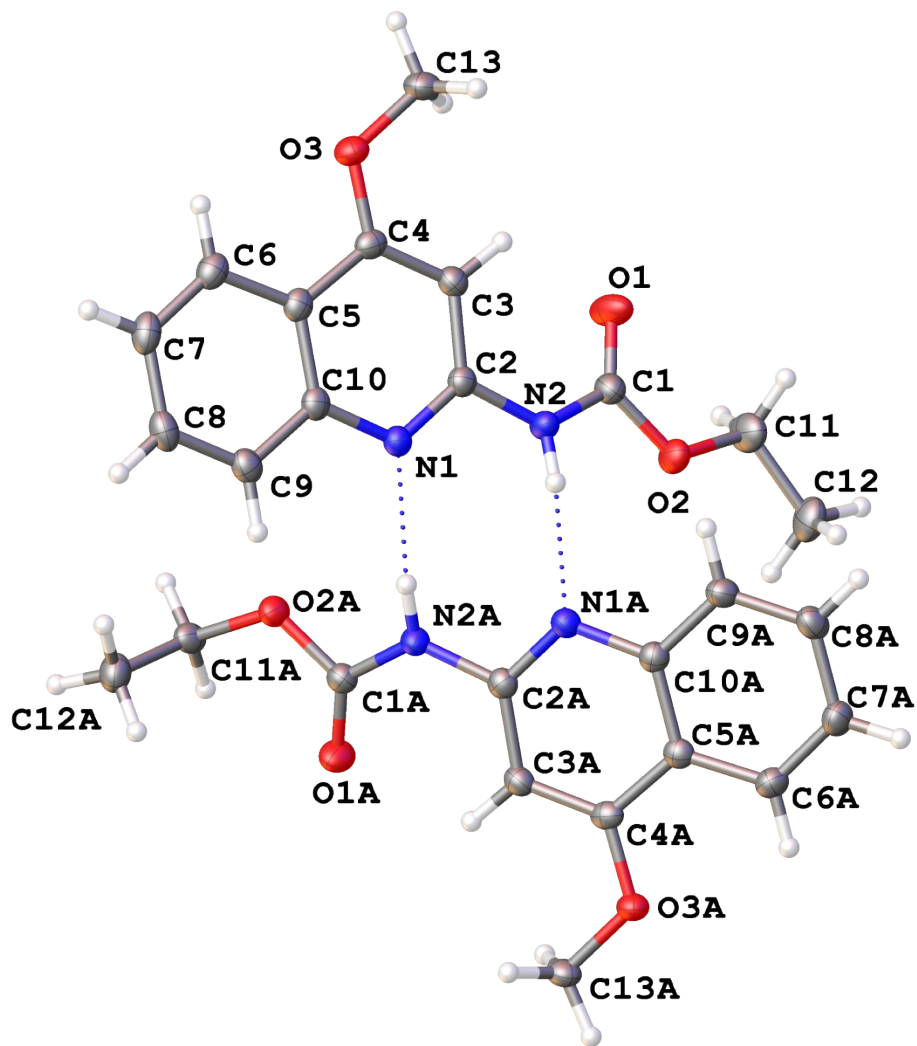

**Figure S4.** View of the molecular structure of **3b**. Thermal ellipsoids are drawn at the 50% probability level.

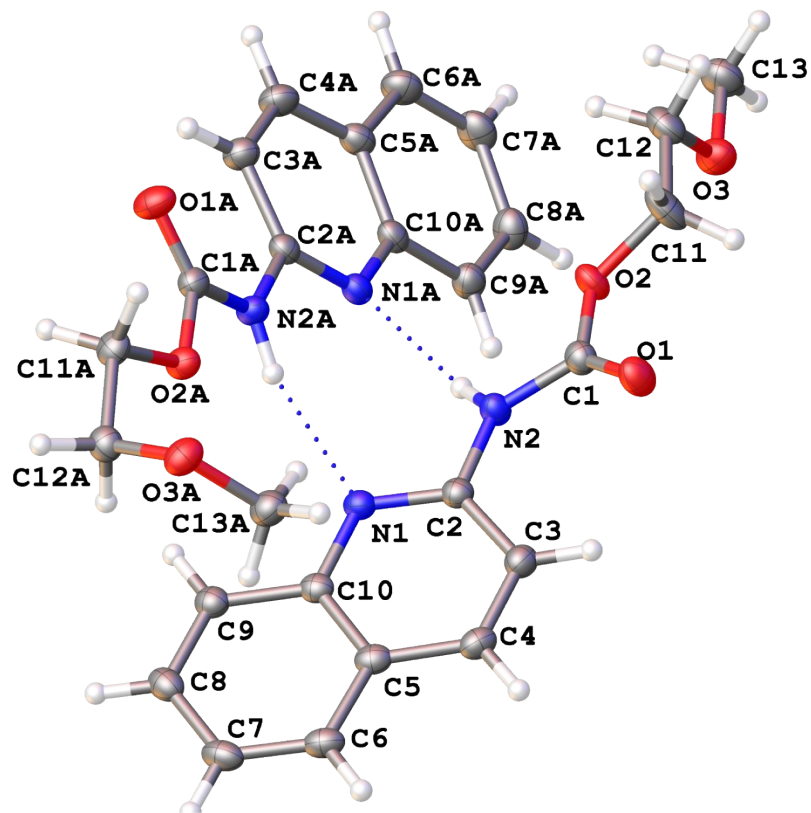

**Figure S5.** View of the molecular structure of **3h**. Thermal ellipsoids are drawn at the 50% probability level.



**Table S1.** Crystal data and structure refinement parameters for **2a**, **2i**, and **2k**.

| Compound                                     | <b>2a</b>                                                        | <b>2i</b>                                                        | <b>2k</b>                                                                  |
|----------------------------------------------|------------------------------------------------------------------|------------------------------------------------------------------|----------------------------------------------------------------------------|
| Identification code                          | KKG-167                                                          | BSC-296                                                          | BSC-297                                                                    |
| CCDC number                                  | 2050683                                                          | 2050680                                                          | 2050682                                                                    |
| Empirical formula                            | C <sub>8</sub> H <sub>10</sub> N <sub>2</sub> O <sub>2</sub>     | C <sub>13</sub> H <sub>18</sub> N <sub>2</sub> O <sub>2</sub>    | C <sub>9</sub> H <sub>9</sub> F <sub>3</sub> N <sub>2</sub> O <sub>2</sub> |
| Formula weight                               | 166.18                                                           | 234.29                                                           | 234.18                                                                     |
| Temperature, K                               | 100(2)                                                           | 100(2)                                                           | 100(2)                                                                     |
| Crystal system                               | monoclinic                                                       | monoclinic                                                       | triclinic                                                                  |
| Space group                                  | P2 <sub>1</sub> /c                                               | P2 <sub>1</sub> /n                                               | P-1                                                                        |
| a, Å                                         | 5.9064(3)                                                        | 8.3092(2)                                                        | 4.8119(2)                                                                  |
| b, Å                                         | 18.7809(8)                                                       | 12.0788(4)                                                       | 10.5336(4)                                                                 |
| c, Å                                         | 7.4306(4)                                                        | 11.8379(3)                                                       | 10.7314(4)                                                                 |
| α, °                                         | 90                                                               | 90                                                               | 114.870(4)                                                                 |
| β, °                                         | 97.589(5)                                                        | 92.429(3)                                                        | 94.157(4)                                                                  |
| γ, °                                         | 90                                                               | 90                                                               | 90.003(3)                                                                  |
| Volume, Å <sup>3</sup>                       | 817.04(7)                                                        | 1187.05(6)                                                       | 491.92(4)                                                                  |
| Z                                            | 4                                                                | 4                                                                | 2                                                                          |
| ρ <sub>calc</sub> , g, cm <sup>3</sup>       | 1.351                                                            | 1.311                                                            | 1.581                                                                      |
| μ, mm <sup>-1</sup>                          | 0.822                                                            | 0.719                                                            | 1.327                                                                      |
| F(000)                                       | 352.0                                                            | 504.0                                                            | 240.0                                                                      |
| Crystal size, mm <sup>3</sup>                | 0.18 × 0.13 × 0.12                                               | 0.17 × 0.15 × 0.12                                               | 0.17 × 0.17 × 0.11                                                         |
| Radiation                                    | CuKα (λ = 1.54184)                                               | CuKα (λ = 1.54184)                                               | CuKα (λ = 1.54184)                                                         |
| 2θ range for data collection, °              | 9.418 to 152.132                                                 | 10.468 to 152.298                                                | 9.112 to 154.646                                                           |
| Index ranges                                 | -7 ≤ h ≤ 6,<br>-23 ≤ k ≤ 22,<br>-9 ≤ l ≤ 8                       | -8 ≤ h ≤ 10,<br>-15 ≤ k ≤ 15,<br>-14 ≤ l ≤ 14                    | -6 ≤ h ≤ 5,<br>-12 ≤ k ≤ 13,<br>-13 ≤ l ≤ 13                               |
| Reflections collected                        | 3366                                                             | 10645                                                            | 6782                                                                       |
| Independent reflections                      | 1661 [R <sub>int</sub> = 0.0232,<br>R <sub>sigma</sub> = 0.0304] | 2462 [R <sub>int</sub> = 0.0425,<br>R <sub>sigma</sub> = 0.0317] | 2033 [R <sub>int</sub> = 0.0372,<br>R <sub>sigma</sub> = 0.0310]           |
| Data/restraints/parameters                   | 1661/0/111                                                       | 2462/0/155                                                       | 2033/0/146                                                                 |
| Goodness-of-fit on F <sup>2</sup>            | 1.093                                                            | 1.048                                                            | 1.096                                                                      |
| Final R indexes [I >= 2σ (I)]                | R <sub>1</sub> = 0.0411,<br>wR <sub>2</sub> = 0.1095             | R <sub>1</sub> = 0.0382,<br>wR <sub>2</sub> = 0.0975             | R <sub>1</sub> = 0.0366,<br>wR <sub>2</sub> = 0.1021                       |
| Final R indexes [all data]                   | R <sub>1</sub> = 0.0501,<br>wR <sub>2</sub> = 0.1159             | R <sub>1</sub> = 0.0465,<br>wR <sub>2</sub> = 0.1032             | R <sub>1</sub> = 0.0385,<br>wR <sub>2</sub> = 0.1041                       |
| Largest diff. peak/hole/<br>eÅ <sup>-3</sup> | 0.23/-0.27                                                       | 0.35/-0.20                                                       | 0.25/-0.29                                                                 |

**Table S2.** Crystal data and structure refinement parameters for **3b** and **3h**.

| Compound                                     | <b>3b</b>                                                     | <b>3h</b>                                                     |
|----------------------------------------------|---------------------------------------------------------------|---------------------------------------------------------------|
| Identification code                          | 16831_UCM-32                                                  | 16831_UCM-26                                                  |
| CCDC number                                  | 2050687                                                       | 2050685                                                       |
| Empirical formula                            | C <sub>13</sub> H <sub>14</sub> N <sub>2</sub> O <sub>3</sub> | C <sub>13</sub> H <sub>14</sub> N <sub>2</sub> O <sub>3</sub> |
| Formula weight                               | 246.26                                                        | 246.26                                                        |
| Temperature, K                               | 100(2)                                                        | 100(2)                                                        |
| Crystal system                               | Triclinic                                                     | monoclinic                                                    |
| Space group                                  | P-1                                                           | P2 <sub>1</sub> /n                                            |
| a, Å                                         | 7.9429(2)                                                     | 11.9095(2)                                                    |
| b, Å                                         | 12.4375(2)                                                    | 7.96230(10)                                                   |
| c, Å                                         | 12.8747(3)                                                    | 25.3411(4)                                                    |
| α, °                                         | 87.653(2)                                                     | 90                                                            |
| β, °                                         | 74.488(2)                                                     | 95.9570(10)                                                   |
| γ, °                                         | 87.068(2)                                                     | 90                                                            |
| Volume, Å <sup>3</sup>                       | 1223.46(5)                                                    | 2390.04(6)                                                    |
| Z                                            | 4                                                             | 8                                                             |
| ρ <sub>calc</sub> , g, cm <sup>3</sup>       | 1.337                                                         | 1.369                                                         |
| μ, mm <sup>-1</sup>                          | 0.796                                                         | 0.815                                                         |
| F(000)                                       | 520.0                                                         | 1040.0                                                        |
| Crystal size, mm <sup>3</sup>                | 0.15 × 0.14 × 0.11                                            | 0.19 × 0.12 × 0.1                                             |
| Radiation                                    | Cu Kα (λ = 1.54184)                                           | Cu Kα (λ = 1.54184)                                           |
| 2θ range for data collection, °              | 7.12 to 141.658                                               | 7.014 to 155.682                                              |
| Index ranges                                 | -9 ≤ h ≤ 8,<br>-15 ≤ k ≤ 15,<br>-15 ≤ l ≤ 15                  | -15 ≤ h ≤ 14,<br>-10 ≤ k ≤ 8,<br>-32 ≤ l ≤ 31                 |
| Reflections collected                        | 24817                                                         | 48959                                                         |
| Independent reflections                      | 4672 [R <sub>int</sub> = 0.0374, R <sub>sigma</sub> = 0.0230] | 4990 [R <sub>int</sub> = 0.0473, R <sub>sigma</sub> = 0.0228] |
| Data/restraints/parameters                   | 4672/0/330                                                    | 4990/0/327                                                    |
| Goodness-of-fit on F <sup>2</sup>            | 1.085                                                         | 1.068                                                         |
| Final R indexes [I ≥ 2σ (I)]                 | R <sub>1</sub> = 0.0368,<br>wR <sub>2</sub> = 0.0985          | R <sub>1</sub> = 0.0383,<br>wR <sub>2</sub> = 0.0968          |
| Final R indexes [all data]                   | R <sub>1</sub> = 0.0404,<br>wR <sub>2</sub> = 0.1021          | R <sub>1</sub> = 0.0415,<br>wR <sub>2</sub> = 0.0992          |
| Largest diff. peak/hole/<br>eÅ <sup>-3</sup> | 0.24/-0.22                                                    | 0.27/-0.33                                                    |

## 6. DFT calculations

All computations were carried out at the DFT/HF hybrid level of theory using hybrid exchange functional B3LYP by using GAUSSIAN2003 program packages.<sup>18</sup> The geometries optimization were performed using the 6–311+G(2d,2p) basis set (standard 6–311G basis set added with polarization (d,p) and diffuse functions). Optimizations were performed on all degrees of freedom and solvent phase optimized structures were verified as true minima with no imaginary frequencies. The Hessian matrix was calculated analytically for the optimized structures in order to prove the location of correct minima and to estimate the thermodynamic parameters. Solvent–phase calculations used the Polarizable Continuum Model (PCM, solvent – ethanol).

Calculated energy for starting urea **1d**:  $E(\text{B3LYP}) = -667.937981796 \text{ h}$ ,  $G^{298} = -667.725729 \text{ h}$ ,  $\mu=3.93 \text{ D}$ .

**Table S3.** Cartesian coordinates for the optimized structure of urea **1d**, Å.

| N  | atom | x         | y         | z         |
|----|------|-----------|-----------|-----------|
| 1  | N    | 2.787914  | -1.196915 | -0.532415 |
| 2  | C    | 2.009452  | -0.214563 | -0.062091 |
| 3  | C    | 2.527871  | 0.900541  | 0.609958  |
| 4  | C    | 3.900672  | 0.983354  | 0.774111  |
| 5  | C    | 4.720819  | -0.030424 | 0.282563  |
| 6  | C    | 4.110701  | -1.099187 | -0.356021 |
| 7  | N    | 0.640989  | -0.443122 | -0.241921 |
| 8  | C    | -0.347700 | 0.534195  | -0.352591 |
| 9  | O    | -0.066139 | 1.733816  | -0.411153 |
| 10 | N    | -1.632298 | 0.076972  | -0.379639 |
| 11 | C    | -2.061010 | -1.307088 | -0.153687 |
| 12 | C    | -3.212506 | -1.367662 | 0.856268  |
| 13 | C    | -4.367847 | -0.446720 | 0.457522  |
| 14 | C    | -3.858018 | 0.978651  | 0.229336  |
| 15 | C    | -2.708091 | 0.993042  | -0.777340 |
| 16 | H    | 4.328233  | 1.835809  | 1.290942  |
| 17 | H    | 1.871107  | 1.668970  | 0.985229  |
| 18 | H    | 4.703074  | -1.918991 | -0.752076 |
| 19 | H    | 5.797308  | 0.003600  | 0.394675  |
| 20 | H    | 0.461875  | -1.357160 | -0.644728 |

|    |   |           |           |           |
|----|---|-----------|-----------|-----------|
| 21 | H | -1.229996 | -1.895625 | 0.222440  |
| 22 | H | -2.378998 | -1.744262 | -1.107396 |
| 23 | H | -3.549858 | -2.403275 | 0.933052  |
| 24 | H | -2.832673 | -1.077051 | 1.839585  |
| 25 | H | -5.142937 | -0.458962 | 1.225761  |
| 26 | H | -4.828492 | -0.818812 | -0.463509 |
| 27 | H | -4.658399 | 1.621690  | -0.142368 |
| 28 | H | -3.512157 | 1.405142  | 1.175123  |
| 29 | H | -2.282821 | 1.985370  | -0.877042 |
| 30 | H | -3.078457 | 0.679655  | -1.760805 |

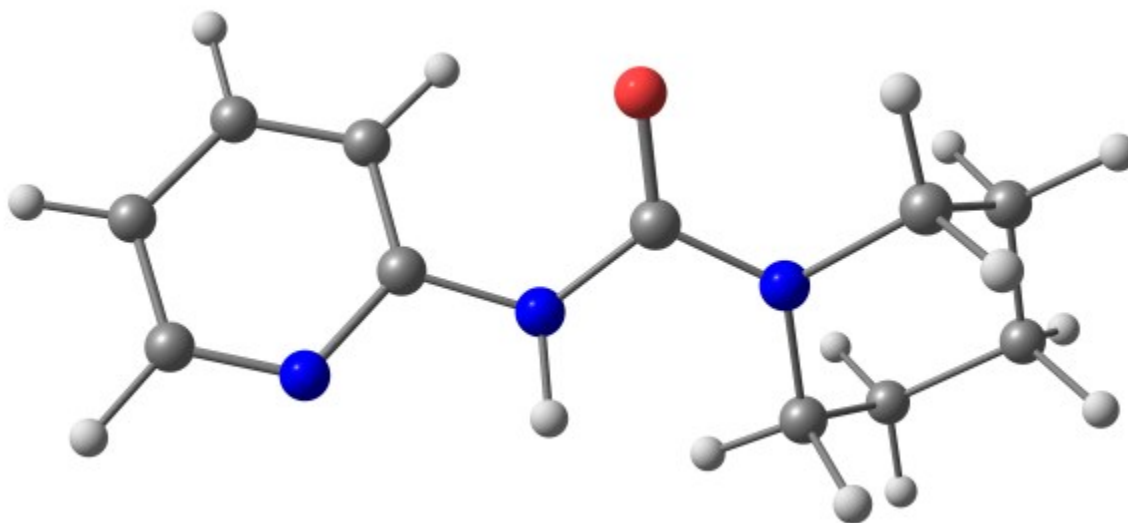

**Figure S6.** Optimized structure of urea **1d**.

Calculated energy for intermediate **II** (Scheme 6):  $E(\text{B3LYP}) = -415.911526522$  h,  $G^{298} = -415.852726$  h,  $\mu=5.24$  D.

**Table S4.** Cartesian coordinates for the optimized structure of intermediate **II**, Å.

| N | atom | x         | y         | z         |
|---|------|-----------|-----------|-----------|
| 1 | C    | -2.238653 | -0.893526 | 0.000349  |
| 2 | C    | -2.537870 | 0.465559  | 0.000256  |
| 3 | C    | -1.484504 | 1.371348  | -0.000077 |
| 4 | N    | -0.197022 | 1.005570  | -0.000379 |
| 5 | C    | 0.069596  | -0.300996 | -0.000322 |
| 6 | C    | -0.910333 | -1.292436 | 0.000073  |
| 7 | H    | -3.029584 | -1.635391 | 0.000623  |
| 8 | H    | -3.561664 | 0.819212  | 0.000439  |
| 9 | H    | -1.674349 | 2.440612  | -0.000138 |

|    |   |           |           |           |
|----|---|-----------|-----------|-----------|
| 10 | H | -0.625593 | -2.337214 | 0.000126  |
| 11 | N | 1.414851  | -0.697345 | -0.000731 |
| 12 | C | 2.458165  | -0.091088 | -0.000099 |
| 13 | O | 3.528498  | 0.375255  | 0.000705  |

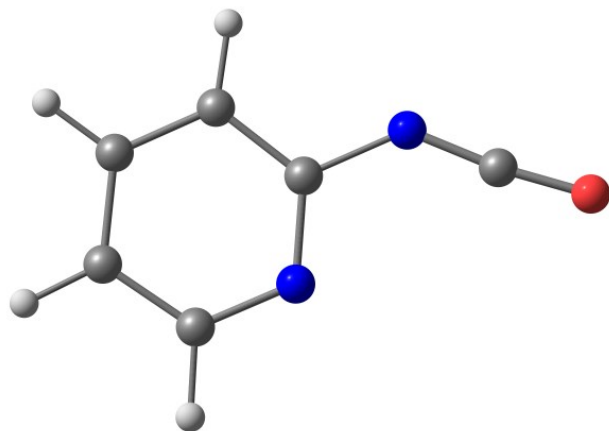

**Figure S7.** Optimized structure of intermediate **I1**.

Calculated energy for intermediate **I2** (Scheme 6):  $E(\text{B3LYP}) = -822.998020007$  h,  $G^{298} = -822.709797$  h,  $\mu = 6.43$  D.

**Table S5.** Cartesian coordinates for the optimized structure of intermediate **I2**, Å.

| N  | atom | x         | y         | z         |
|----|------|-----------|-----------|-----------|
| 1  | C    | -1.738352 | -0.920327 | -0.812177 |
| 2  | C    | -1.817140 | -0.468522 | 0.528639  |
| 3  | N    | -2.961345 | -0.525434 | 1.213615  |
| 4  | C    | -4.043019 | -1.052204 | 0.621639  |
| 5  | C    | -4.056793 | -1.531602 | -0.675168 |
| 6  | C    | -2.867212 | -1.450546 | -1.404060 |
| 7  | N    | -0.776363 | 0.103829  | 1.248320  |
| 8  | C    | 0.592930  | 0.532758  | 1.136822  |
| 9  | O    | 0.929258  | 1.360110  | 2.000362  |
| 10 | N    | 1.575652  | -0.242495 | 0.534346  |
| 11 | C    | 2.962397  | 0.212130  | 0.635691  |
| 12 | C    | 3.781747  | -0.238228 | -0.576268 |
| 13 | C    | 3.678128  | -1.753183 | -0.785272 |
| 14 | C    | 2.209389  | -2.174222 | -0.874394 |
| 15 | C    | 1.425390  | -1.685027 | 0.347840  |
| 16 | O    | 0.136786  | 1.696862  | -0.536959 |
| 17 | C    | -0.271756 | 3.073242  | -0.310018 |

|    |   |           |           |           |
|----|---|-----------|-----------|-----------|
| 18 | C | -0.786136 | 3.711065  | -1.586487 |
| 19 | H | -2.826259 | -1.795308 | -2.431678 |
| 20 | H | -0.828070 | -0.827986 | -1.375313 |
| 21 | H | -4.943273 | -1.080405 | 1.228795  |
| 22 | H | -4.962442 | -1.941686 | -1.103411 |
| 23 | H | -1.056804 | 0.380427  | 2.189446  |
| 24 | H | 0.380904  | -1.918393 | 0.226392  |
| 25 | H | 1.808356  | -2.206786 | 1.238202  |
| 26 | H | 2.115536  | -3.260292 | -0.946458 |
| 27 | H | 1.761775  | -1.748320 | -1.778193 |
| 28 | H | 4.225438  | -2.054660 | -1.680311 |
| 29 | H | 4.147267  | -2.265091 | 0.061349  |
| 30 | H | 4.821110  | 0.065250  | -0.435757 |
| 31 | H | 3.415518  | 0.278905  | -1.468977 |
| 32 | H | 2.968510  | 1.294063  | 0.736587  |
| 33 | H | 3.420483  | -0.192823 | 1.549433  |
| 34 | H | 0.569409  | 3.619954  | 0.113498  |
| 35 | H | -1.058127 | 3.004996  | 0.431597  |
| 36 | H | -1.110460 | 4.735629  | -1.390994 |
| 37 | H | -0.005206 | 3.750216  | -2.347128 |
| 38 | H | -1.634338 | 3.154036  | -1.981683 |
| 39 | H | 0.979268  | 1.669193  | -0.997315 |

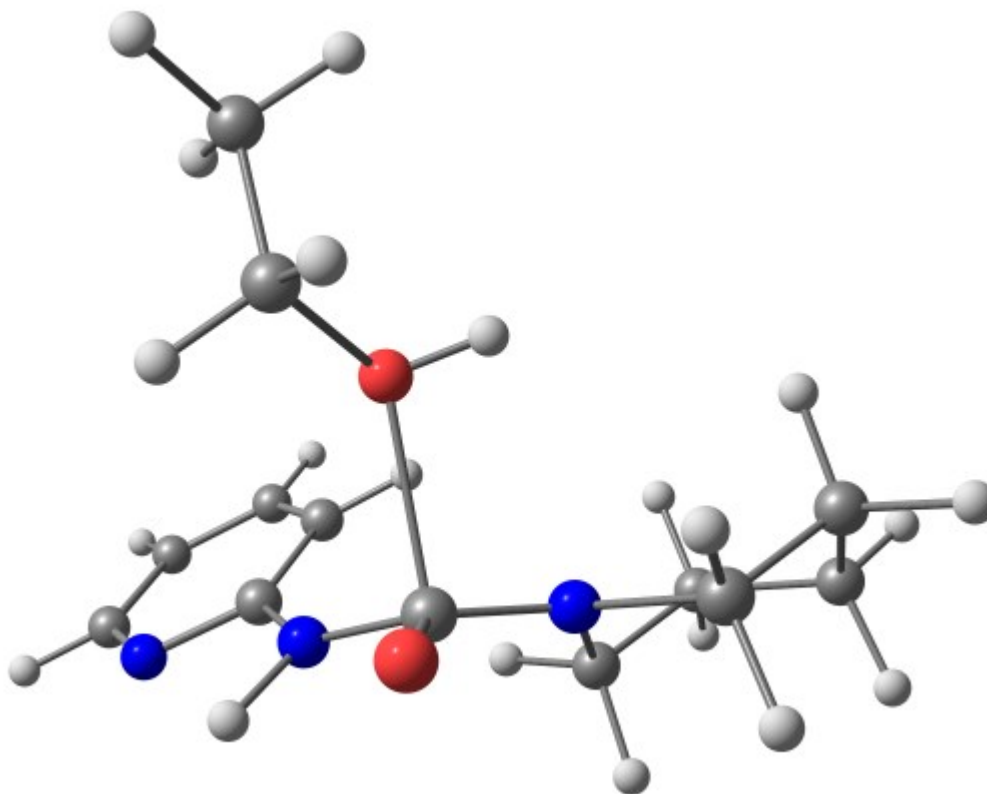

**Figure S8.** Optimized structure of intermediate **I2**.

Calculated energy for intermediate **I3** (Scheme 6):  $E(\text{B3LYP}) = -822.998020007$  h,  $G^{298} = -822.709797$  h,  $\mu=6.43$  D.

**Table S6.** Cartesian coordinates for the optimized structure of intermediate **I3**, Å.

| N  | atom | x         | y         | z         |
|----|------|-----------|-----------|-----------|
| 1  | C    | -2.228857 | -0.782101 | 0.901647  |
| 2  | C    | -1.974992 | 0.014289  | -0.232347 |
| 3  | N    | -2.930478 | 0.249840  | -1.152139 |
| 4  | C    | -4.145093 | -0.276684 | -0.967776 |
| 5  | C    | -4.491526 | -1.059064 | 0.123294  |
| 6  | C    | -3.497290 | -1.309456 | 1.067630  |
| 7  | N    | -0.766814 | 0.612856  | -0.524479 |
| 8  | C    | 0.489287  | 0.686396  | 0.194897  |
| 9  | O    | 0.278412  | 0.670682  | 1.590340  |
| 10 | N    | 1.416507  | -0.365562 | -0.174570 |
| 11 | C    | 2.722444  | -0.274674 | 0.506764  |
| 12 | C    | 3.740133  | -1.197313 | -0.162671 |
| 13 | C    | 3.242174  | -2.644327 | -0.184896 |
| 14 | C    | 1.840563  | -2.711487 | -0.796001 |
| 15 | C    | 0.884805  | -1.733080 | -0.110826 |
| 16 | O    | 1.131851  | 1.875240  | -0.232030 |
| 17 | C    | 0.590186  | 3.114312  | 0.246279  |
| 18 | C    | 1.351176  | 4.243863  | -0.419032 |
| 19 | H    | -3.707130 | -1.922630 | 1.937795  |
| 20 | H    | -1.455220 | -0.979128 | 1.625391  |
| 21 | H    | -4.875768 | -0.054248 | -1.740762 |
| 22 | H    | -5.492304 | -1.458626 | 0.224728  |
| 23 | H    | -0.725399 | 1.021671  | -1.455414 |
| 24 | H    | -0.079076 | -1.761285 | -0.610332 |
| 25 | H    | 0.731092  | -2.049297 | 0.931899  |
| 26 | H    | 1.431244  | -3.720822 | -0.713830 |
| 27 | H    | 1.890706  | -2.468501 | -1.861018 |
| 28 | H    | 3.933727  | -3.283083 | -0.738191 |
| 29 | H    | 3.207540  | -3.029245 | 0.839650  |
| 30 | H    | 4.690238  | -1.124080 | 0.371321  |
| 31 | H    | 3.916313  | -0.851766 | -1.185155 |
| 32 | H    | 3.059903  | 0.756141  | 0.463057  |
| 33 | H    | 2.625610  | -0.550779 | 1.566486  |
| 34 | H    | 0.701013  | 3.168839  | 1.331766  |
| 35 | H    | -0.475032 | 3.174357  | 0.004789  |

|    |   |           |          |           |
|----|---|-----------|----------|-----------|
| 36 | H | 0.971872  | 5.202862 | -0.064529 |
| 37 | H | 2.414072  | 4.188144 | -0.183820 |
| 38 | H | 1.234523  | 4.208182 | -1.502217 |
| 39 | H | -0.452587 | 1.261941 | 1.848452  |

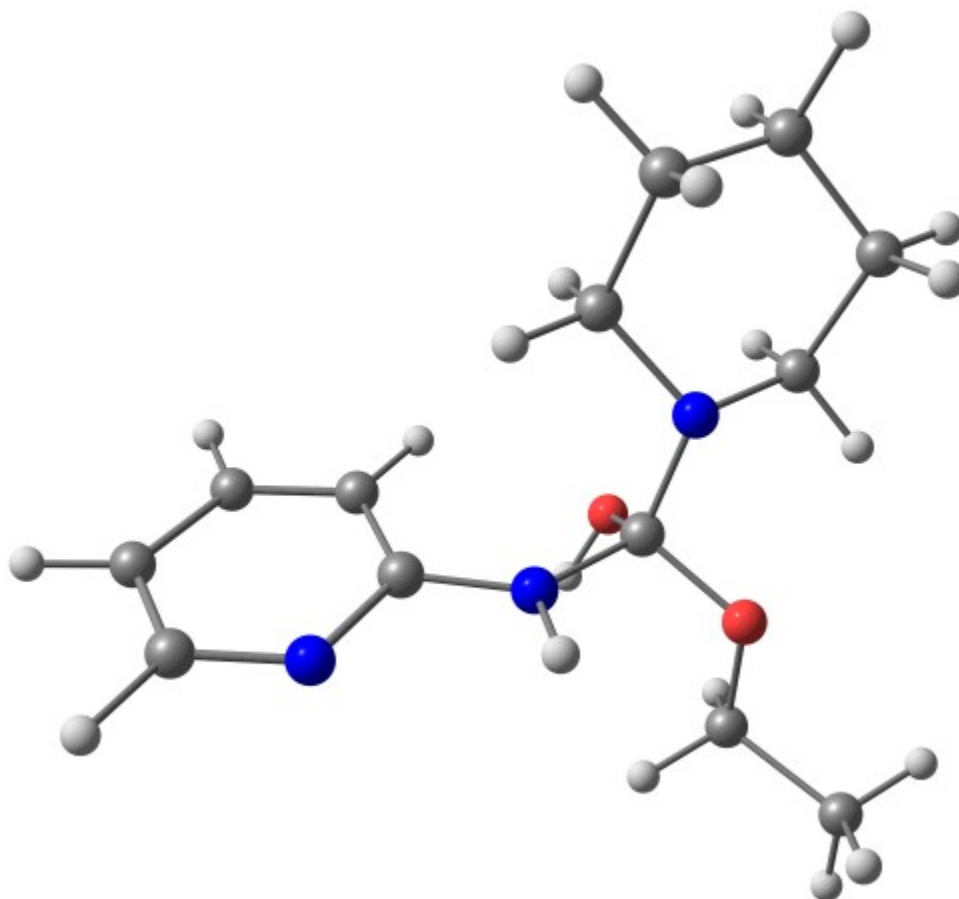

**Figure S9.** Optimized structure of intermediate **I3**.

Calculated energy for carbamate **2n** (Scheme 6):  $E(\text{B3LYP}) = -571.054236896$  h,  $G^{298} = -570.917572$  h,  $\mu=0.59$  D.

**Table S7.** Cartesian coordinates for the optimized structure of intermediate **2n**, Å.

| N | atom | x         | y         | z         |
|---|------|-----------|-----------|-----------|
| 1 | C    | -3.953419 | 0.050140  | 0.001754  |
| 2 | C    | -3.136428 | 1.177112  | -0.000264 |
| 3 | C    | -1.757252 | 1.032267  | -0.001961 |
| 4 | C    | -1.236604 | -0.267166 | -0.001317 |
| 5 | N    | -2.011022 | -1.358519 | 0.000115  |



|    |   |           |           |           |
|----|---|-----------|-----------|-----------|
| 6  | C | -3.337346 | -1.193181 | 0.001507  |
| 7  | N | 0.130262  | -0.566907 | -0.003574 |
| 8  | C | 1.193227  | 0.290940  | -0.000224 |
| 9  | O | 2.339873  | -0.419021 | 0.000456  |
| 10 | C | 3.570981  | 0.352168  | 0.001242  |
| 11 | C | 4.721672  | -0.628475 | 0.000147  |
| 12 | O | 1.140523  | 1.506953  | 0.001510  |
| 13 | H | -3.569144 | 2.171670  | -0.000540 |
| 14 | H | -1.101518 | 1.886840  | -0.003870 |
| 15 | H | -3.928731 | -2.104228 | 0.003155  |
| 16 | H | -5.033396 | 0.129484  | 0.003251  |
| 17 | H | 0.347317  | -1.565119 | -0.002356 |
| 18 | H | 3.580445  | 0.987710  | 0.886095  |
| 19 | H | 3.580370  | 0.989602  | -0.882256 |
| 20 | H | 4.697539  | -1.262017 | -0.886255 |
| 21 | H | 4.697373  | -1.264163 | 0.885016  |
| 22 | H | 5.662914  | -0.078078 | 0.000936  |

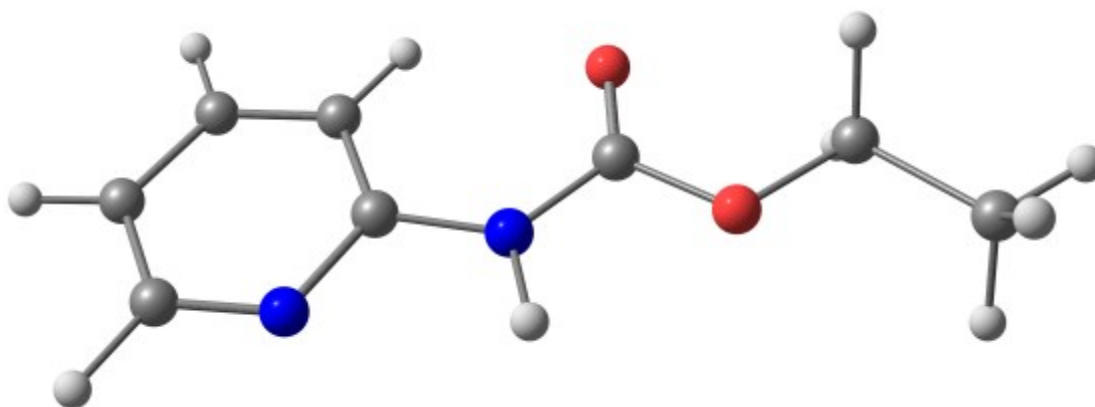

**Figure S10.** Optimized structure of carbamate **2n**.

## **7. The reaction mechanism experimental study**

Urea 1c (10 mg, 1 eq) and phenyl isocyanate (0.02 mL, 4 eq) were mixed in toluene (1 mL) and stirred at 120 °C for 1 hour. A white precipitate formed. The reaction mixture was cooled to room temperature and the precipitate was filtered off. The filtrate was evaporated with a rotary evaporator, dissolved in CDCl<sub>3</sub>, and analyzed by <sup>1</sup>H NMR spectroscopy and high-resolution mass spectrometry.

## 8. References

- 1 V. A. Rassadin, D. P. Zimin, G. Z. Raskil'dina, A. Y. Ivanov, V. P. Boyarskiy, S. S. Zlotskii and V. Y. Kukushkin, *Green Chem.*, 2016, **18**, 6630–6636.
- 2 S. E. Wengryniuk, A. Weickgenannt, C. Reiher, N. A. Strotman, K. Chen, M. D. Eastgate and P. S. Baran, *Org. Lett.*, 2013, **15**, 792–795.
- 3 V. V. Romanov, Y. P. Nizhnik and A. D. Fofanov, *J. Struct. Chem.*, 2015, **56**, 365–369.
- 4 K. Inamoto, Y. Araki, S. Kikkawa, M. Yonemoto, Y. Tanaka and Y. Kondo, *Org. Biomol. Chem.*, 2013, **11**, 4438–4441.
- 5 K. Geyl, S. Baykov, M. Tarasenko, L. E. Zelenkov, V. Matveevskaya and V. P. Boyarskiy, *Tetrahedron Lett.*, 2019, **60**, 151108.
- 6 D. M. Bystrov, E. S. Zhilin, L. L. Fershtat, A. A. Romanova, I. V. Ananyev and N. N. Makhova, *Adv. Synth. Catal.*, 2018, **360**, 3157–3163.
- 7 S. Shapiro, I. Rose, F. Testa and L. Freedman, *J. Org. Chem.*, 1959, **24**, 1606–1607.
- 8 N. C. Ihle and A. E. Krause, *J. Org. Chem.*, 1996, **61**, 4810–4811.
- 9 M. P. Shewalkar, R. R. Rao, V. Reddy, S. N. Darandale and D. B. Shinde, *Lett. Org. Chem.*, 2013, **10**, 60–64.
- 10 A. R. Katritzky, *J. Chem. Soc.*, 1956, 2063–2066.
- 11 A. R. Katritzky, I. R. Beattie, A. Dyer, M. Daniels, J. Lyon, J. Weiss, P. C. Anson, J. M. Tedder, J. I. Jones, N. G. Savill, Y. Liwschitz, A. Zilkha, Y. Edlitz-Pfeffermann, Y. Shorr, R. Mirza, J. D. Cocker, T. G. Halsall, A. Campbell, S. D. Cavalla, D. T. Elmore, J. R. Ogle and S. Trippett, *J. Chem. Soc.*, 1957, 4385–4408.
- 12 B. I. Ardashev and Y. M. Popova, *Chem. Heterocycl. Compd.*, 1972, **8**, 480–481.
- 13 A. Abengózar, B. Abarca, A. M. Cuadro, D. Sucunza, J. Álvarez-Builla and J. J. Vaquero, *Eur. J. Org. Chem.*, 2015, **2015**, 4214–4223.
- 14 G. M. Sheldrick, *Acta Crystallogr. Sect. A Found. Adv.*, 2015, **71**, 3–8.
- 15 G. M. Sheldrick, *Acta Crystallogr. Sect. C Struct. Chem.*, 2015, **71**, 3–8.
- 16 O. V. Dolomanov, L. J. Bourhis, R. J. Gildea, J. A. K. Howard and H. Puschmann, *J. Appl. Crystallogr.*, 2009, **42**, 339–341.
- 17 CrysAlis PRO. Agilent Technologies Ltd: Yarnton, Oxfordshire, England 2014.
- 18 Frisch, M. J.; Trucks, G. W.; Schlegel, H. B.; Scuseria, G. E.; Robb, M. A.; Cheeseman, J. R.; Montgomery, J. A.; Vreven, Jr. T.; Kudin, K. N.; Burant, J. C.; Millam, J. M.; Iyengar,

S. S.; Tomasi, J.; Barone, V.; Mennucci, B.; Cossi, M.; Scalmani, G.; Rega, N.; Petersson, G. A.; Nakatsuji, H.; Hada, M.; Ehara, M.; Toyota, K.; Fukuda, R.; Hasegawa, J.; Ishida, M.; Nakajima, T.; Honda, Y.; Kitao, O.; Nakai, H.; Klene, M.; Li, X.; Knox, J. E.; Hratchian, H. P.; Cross, J. B.; Bakken, V.; Adamo, C.; Jaramillo, J.; Gomperts, R.; Stratmann, R. E.; Yazyev, O.; Austin, A. J.; Cammi, R.; Pomelli, C.; Ochterski, J. W.; Ayala, Y.; Morokuma, K.; Voth, G. A.; Salvador, P.; Dannenberg, J. J.; Zakrzewski, V. G.; Dapprich, S.; Daniels, A. D.; Strain, M. C.; Farkas, O.; Malick, D. K.; Rabuck, A. D.; Raghavachari, K.; Foresman, J. B.; Ortiz, J. V.; Cui, Q.; Baboul, A. G.; Clifford, S.; Cioslowski, J.; Stefanov, B. B.; Liu, G.; Liashenko, A.; Piskorz, P.; Komaromi, I.; Martin, R. L.; Fox, D. J.; Keith, T.; Al-Laham, M. A.; Peng, C. Y.; Nanayakkara, A.; Challacombe, M.; Gill, P. M. W.; Johnson, B.; Chen, W.; Wong, M. W.; Gonzalez, C.; Pople, J. A. Gaussian 03, Revision D.02, Gaussian, Inc., Wallingford CT, 2004.
